# Supplementary material for: Synthesis, characterization and in vitro cytotoxic activities of new steroidal thiosemicarbazones and thiadiazolines
Source: Royal Society of Chemistry journal article supplement (doi:10.1039/c6ra01516f), 2016-01-01

## Supplementary data

### **Synthesis, characterization and *in vitro* cytotoxic activities of new steroidal thiosemicarbazones and thiadiazolines**

Marijana B. Živković<sup>a</sup>, Ivana Z. Matic<sup>b</sup>, Marko V. Rodić<sup>c</sup>, Irena T. Novaković<sup>a</sup>, Dušan M. Sladić<sup>d</sup>, Natalija M. Krstić<sup>a</sup>

<sup>a</sup>Center for Chemistry, Institute of Chemistry, Technology and Metallurgy, University of Belgrade, Studentski trg 12-16, P. O. Box 473, 11001 Belgrade, Republic of Serbia

<sup>b</sup>Institute for Oncology and Radiology of Serbia, Pasterova 14, 11000 Belgrade, Republic of Serbia

<sup>c</sup>Faculty of Sciences, University of Novi Sad, Trg D. Obradovića 3, 21000 Novi Sad, Republic of Serbia

<sup>d</sup>Faculty of Chemistry, University of Belgrade, Studentski trg 12-16, P. O. Box 158, 11001 Belgrade, Republic of Serbia

## Compound 2a

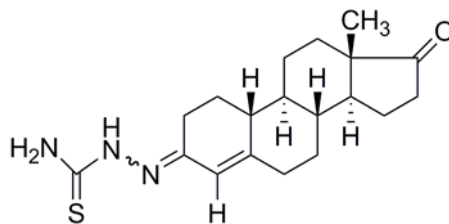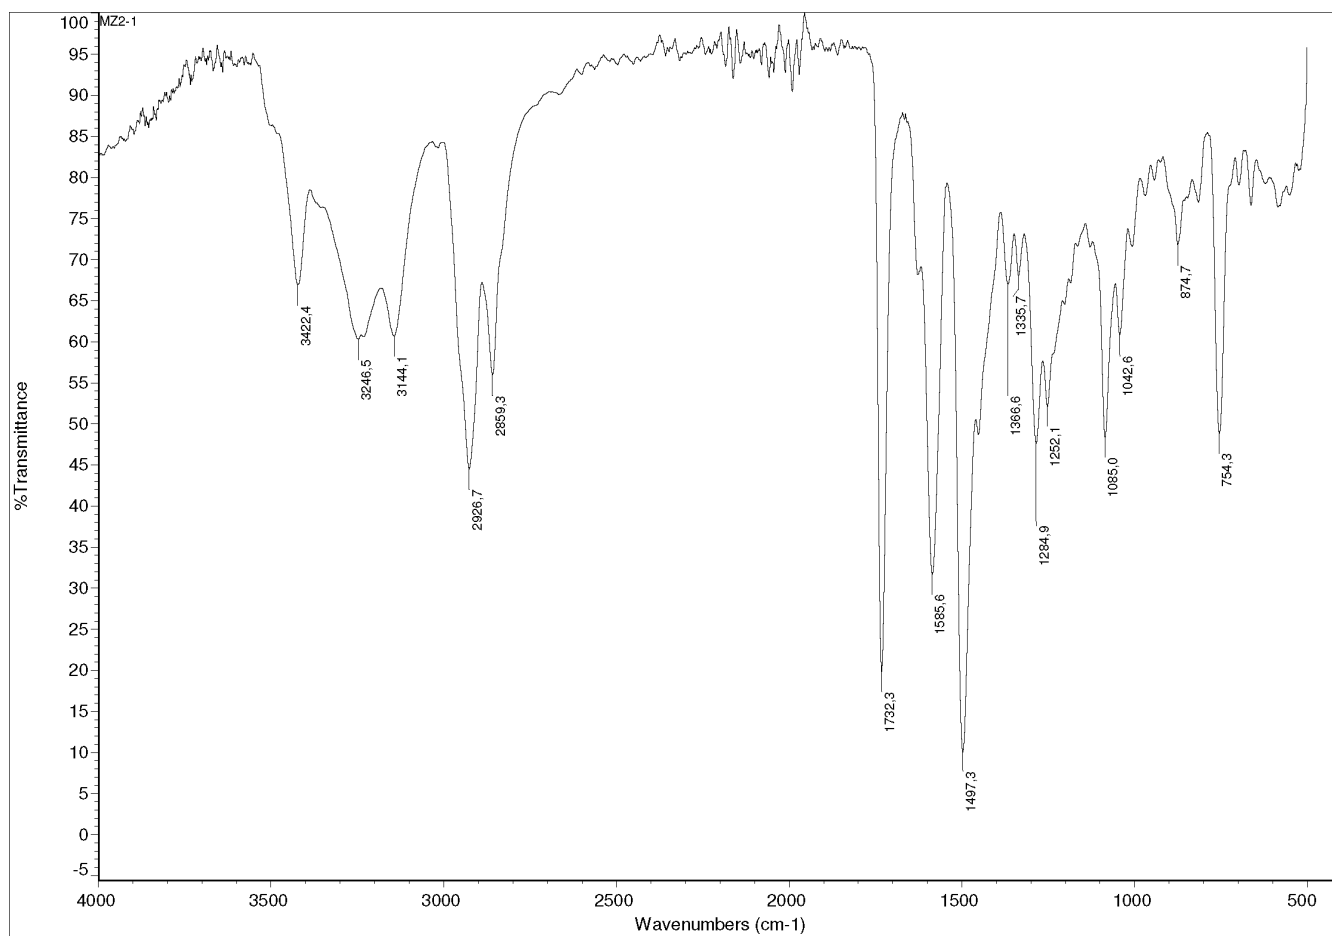

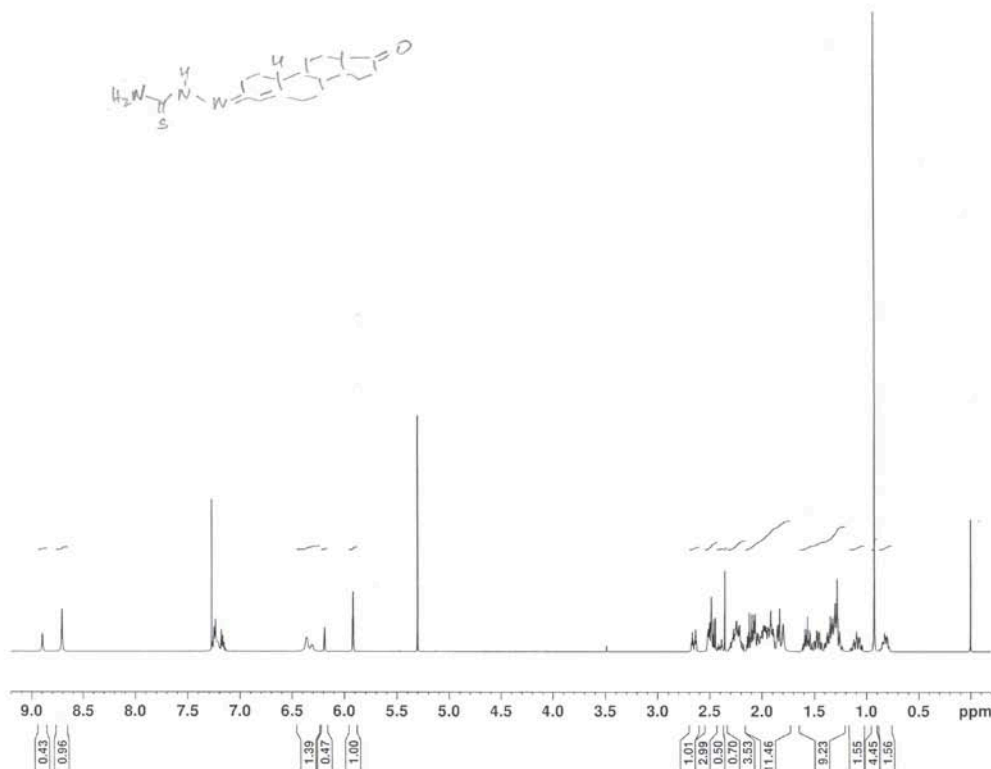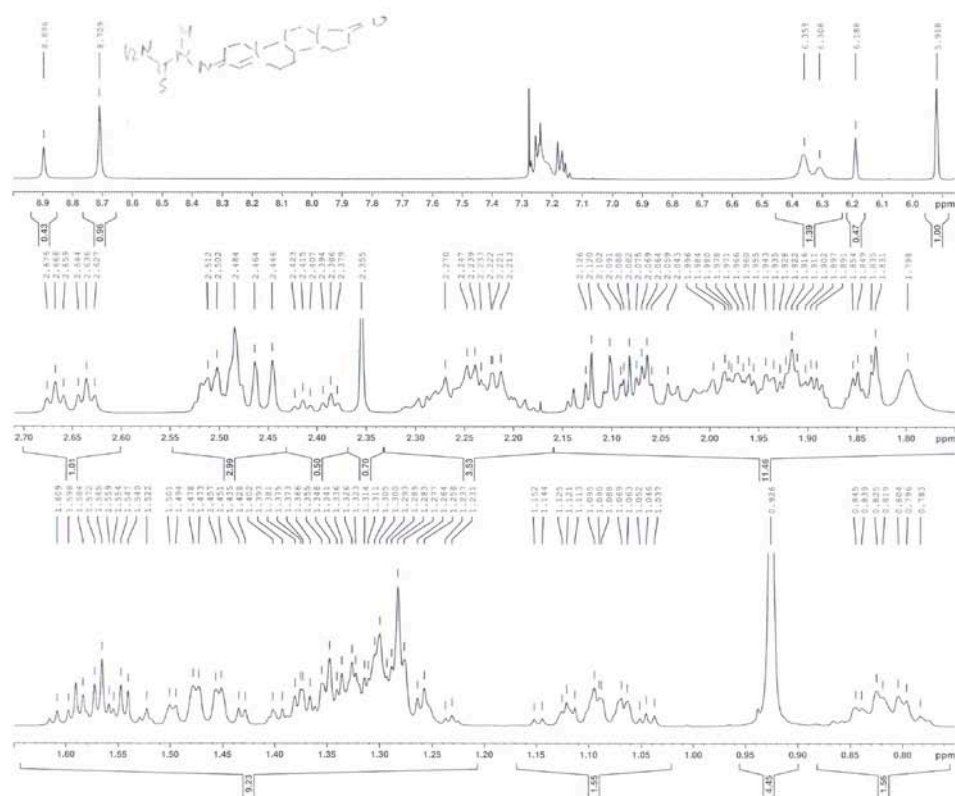

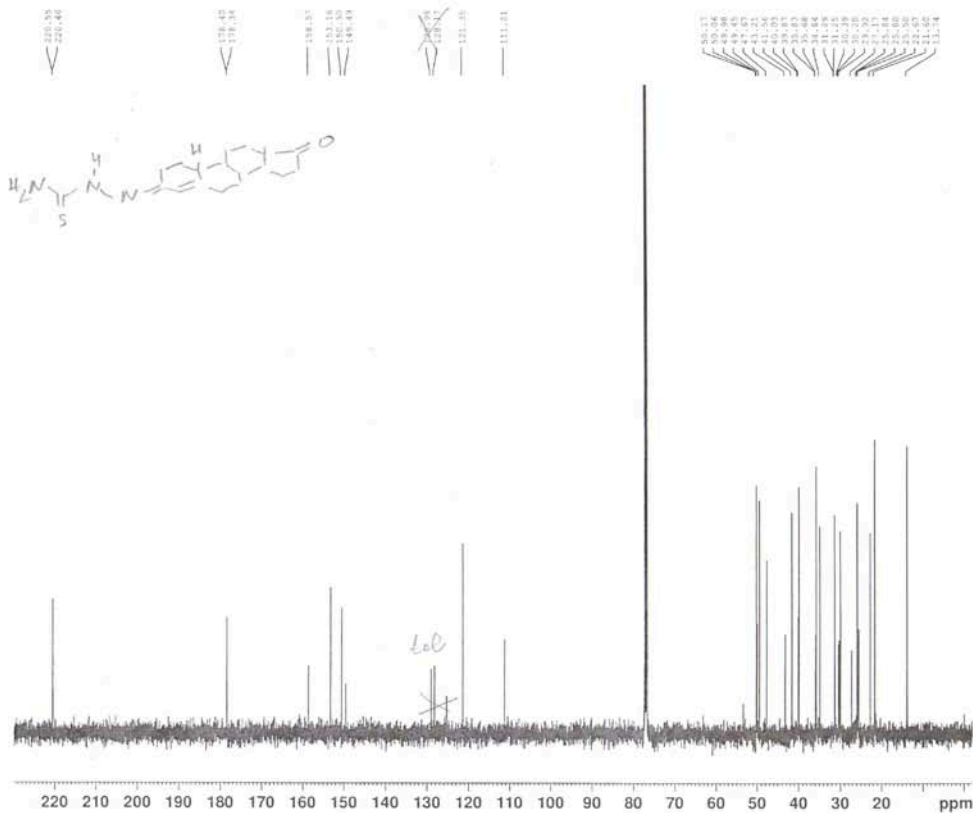

Current Data Parameters

NAME M22  
EXPNO 2  
PROCNO 1

F2 - Acquisition Parameters

Date\_ 20140602  
Time 11.52  
INSTRUM spect  
PROBHD 5 mm BBO BB-1H  
PULPROG zgpg30  
TD 32768  
SOLVENT CDCl3  
NS 257  
DS 4  
SWH 32694.738 Hz  
FIDRES 1.003868 Hz  
AQ 0.4980736 sec  
RG 1030  
DW 15.200 usec  
DE 6.50 usec  
TE 298.0 K  
D1 2.00000000 sec  
D11 0.03000000 sec  
TD0 1

===== CHANNEL f1 =====

SFO1 125.8055719 MHz  
NUC1 13C  
P1 11.50 usec  
PLM1 32.22800064 W

===== CHANNEL f2 =====

SFO2 500.2623242 MHz  
NUC2 1H  
CTDPRG12 waltz16  
PCPD2 80.00 usec  
PLM2 20.77000046 W  
PLM12 0.38267001 W  
PLM13 0.25130999 W

F2 - Processing parameters

SF 125.7904843 MHz  
WDW EM  
SSB 0  
LS 1.50 Hz  
GB 0  
PC 1.40

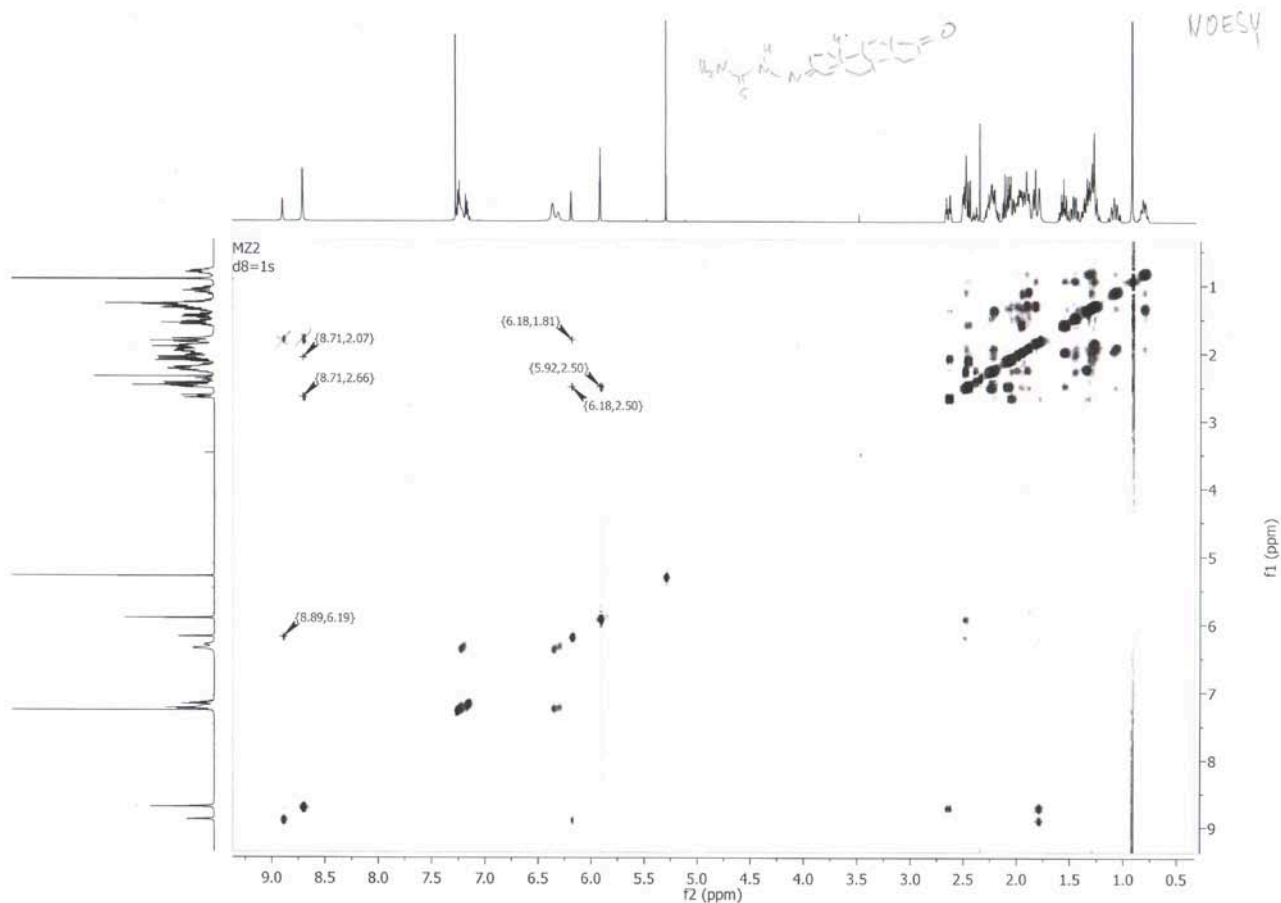

Sample Name: MZ2 Sample Location: P1-C6 Sample Id: Operator: Milka  
 Data File Name: D:\PE Sciex Data\Projects\Sladic\Data\MZ2\_Z\_E\_C18\_RRHT\_5\_MK70V\_pos1.wiff Acq Time: March 24 2014, 01:53:40 PM  
 Method: d:\TOF Data\damethods\Night\_Seq\_Comp\_Ident1.anm\efc.xml

One or more scans have failed IRM. Review the data file for details.

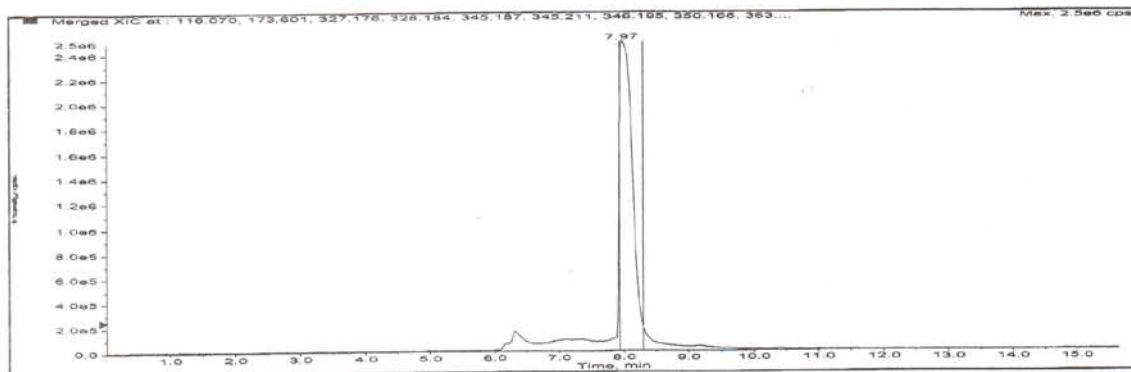

Merged XIC, Period# : 1 Experiment# : 1

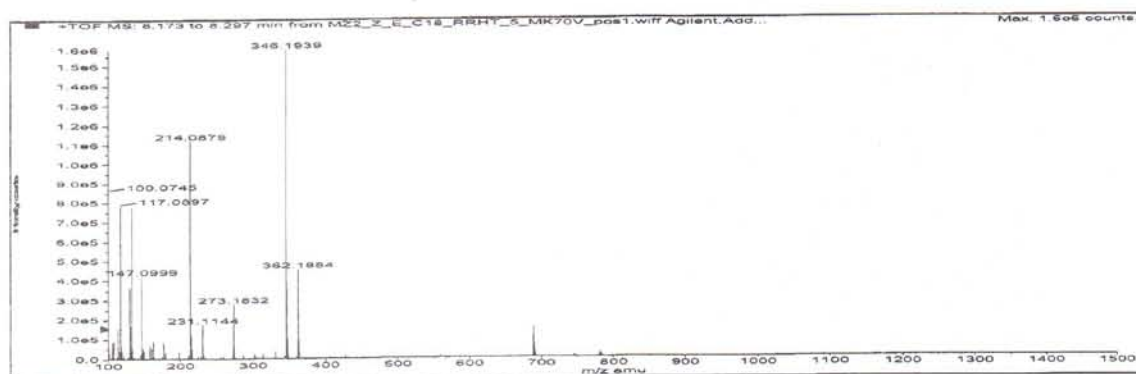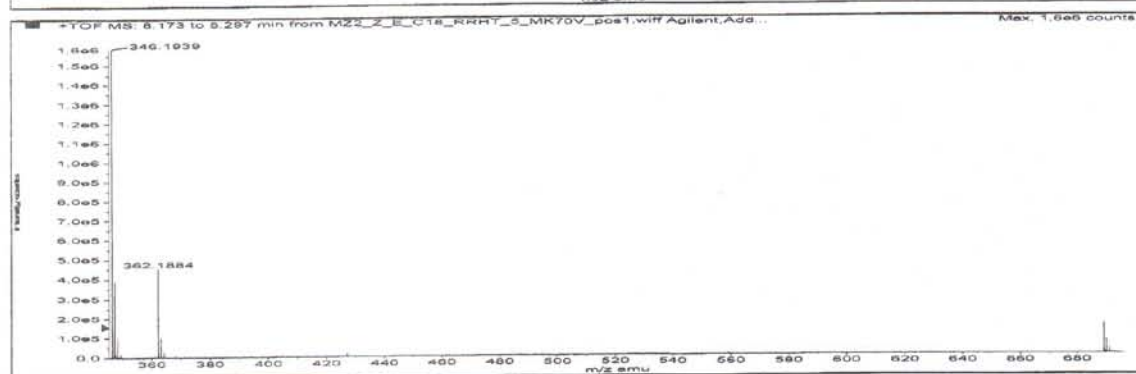

| Formula                                                       | Compound name | Mass      | Peak RT. (min) | Peak area  | Description |
|---------------------------------------------------------------|---------------|-----------|----------------|------------|-------------|
| C <sub>19</sub> H <sub>27</sub> N <sub>3</sub> O <sub>5</sub> | —             | 345.18748 | 7.97           | 3.42837 E7 | —           |

| Species                           | Abundance (counts) | Ion Mass  | Measured Mass | Error (mDa) | Error (ppm) | Ret. Time Error (min) |
|-----------------------------------|--------------------|-----------|---------------|-------------|-------------|-----------------------|
| [M+H] <sup>+</sup>                | 1592200.42         | 346.19476 | 346.19388     | -0.88163    | -2.55       | —                     |
| [M+NH <sub>4</sub> ] <sup>+</sup> | 98766.91           | 363.22131 | 363.19179     | -29.52256   | -81.20      | —                     |
| [2M+H] <sup>+</sup>               | 29112.46           | 691.38224 | 691.36763     | -14.60880   | -21.13      | —                     |

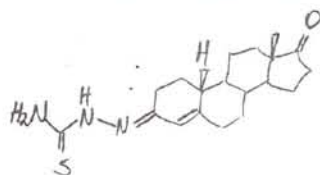

## Compound 3a

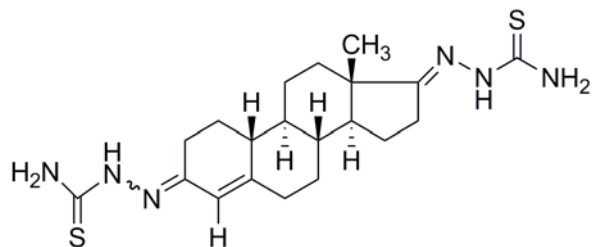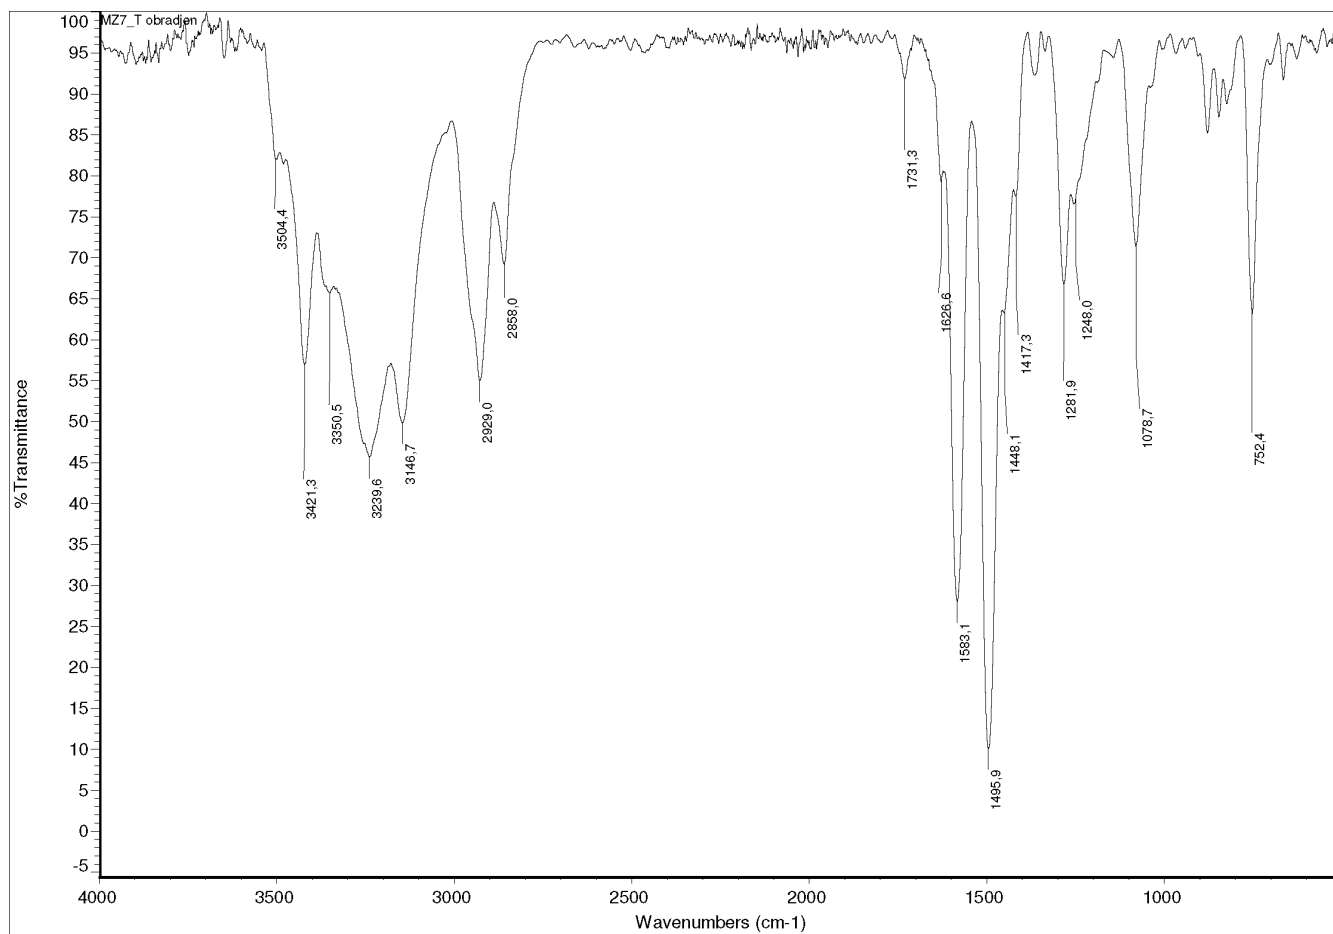

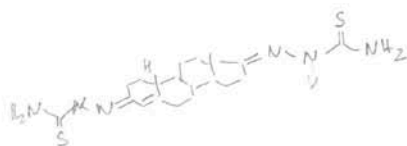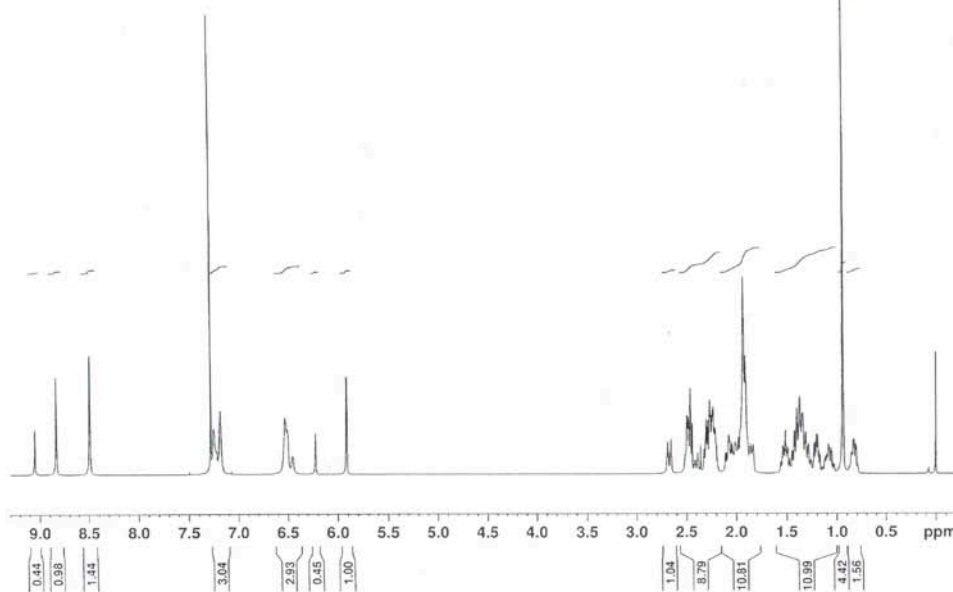

Current Data Parameters  
NAME MD7  
EXPNO 1  
PROCNO 1

F2 - Acquisition Parameters  
Date\_ 20140602  
Time 13.55  
INSTRUM spect  
PROBHD 5 mm BBO BB-1H  
PULPROG zg30  
TD 32768  
SOLVENT CDCl3  
NS 16  
DS 6  
SWH 5357.143 Hz  
FIDRES 0.163487 Hz  
AQ 3.0583467 sec  
RG 128  
DW 93.333 usec  
DE 6.50 usec  
TE 298.0 K  
D1 2.0000000 sec  
TDO 1

----- CHANNEL f1 -----  
SFO1 500.2623246 MHz  
NUC1 1H  
P1 9.35 usec  
PLW1 27.37999916 W

F2 - Processing parameters  
SI 32768  
SF 500.2600014 MHz  
WDW EM  
SSB 0  
LB 0.20 Hz  
GB 0  
PC 1.00

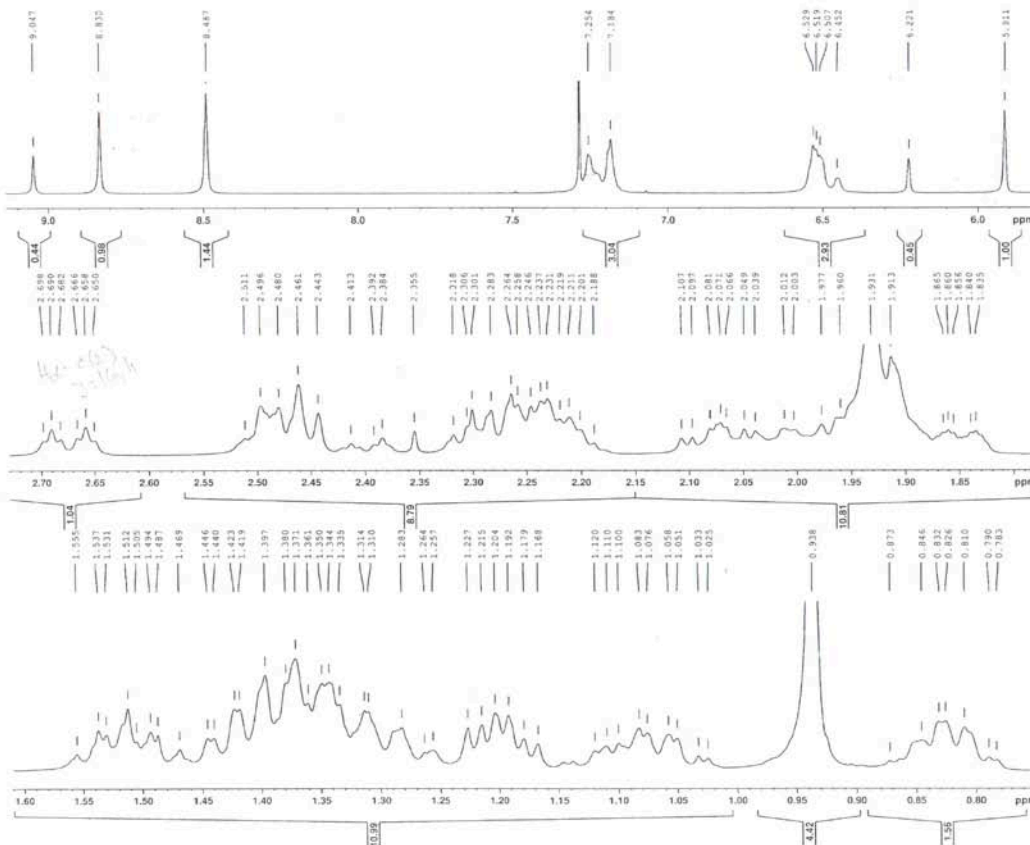

Current Data Parameters  
NAME MD7  
EXPNO 1  
PROCNO 1

F2 - Acquisition Parameters  
Date\_ 20140602  
Time 13.59  
INSTRUM spect  
PROBHD 5 mm BBO BB-1H  
PULPROG zg30  
TD 32768  
SOLVENT CDCl3  
NS 16  
DS 0  
SWH 5357.143 Hz  
FIDRES 0.163487 Hz  
AQ 3.0583467 sec  
RG 128  
DW 93.333 usec  
DE 6.50 usec  
TE 298.0 K  
D1 2.0000000 sec  
TDO 1

----- CHANNEL f1 -----  
SFO1 500.2623246 MHz  
NUC1 1H  
P1 9.35 usec  
PLW1 27.37999916 W

F2 - Processing parameters  
SI 32768  
SF 500.2600014 MHz  
WDW EM  
SSB 0  
LB 0.20 Hz  
GB 0  
PC 1.00

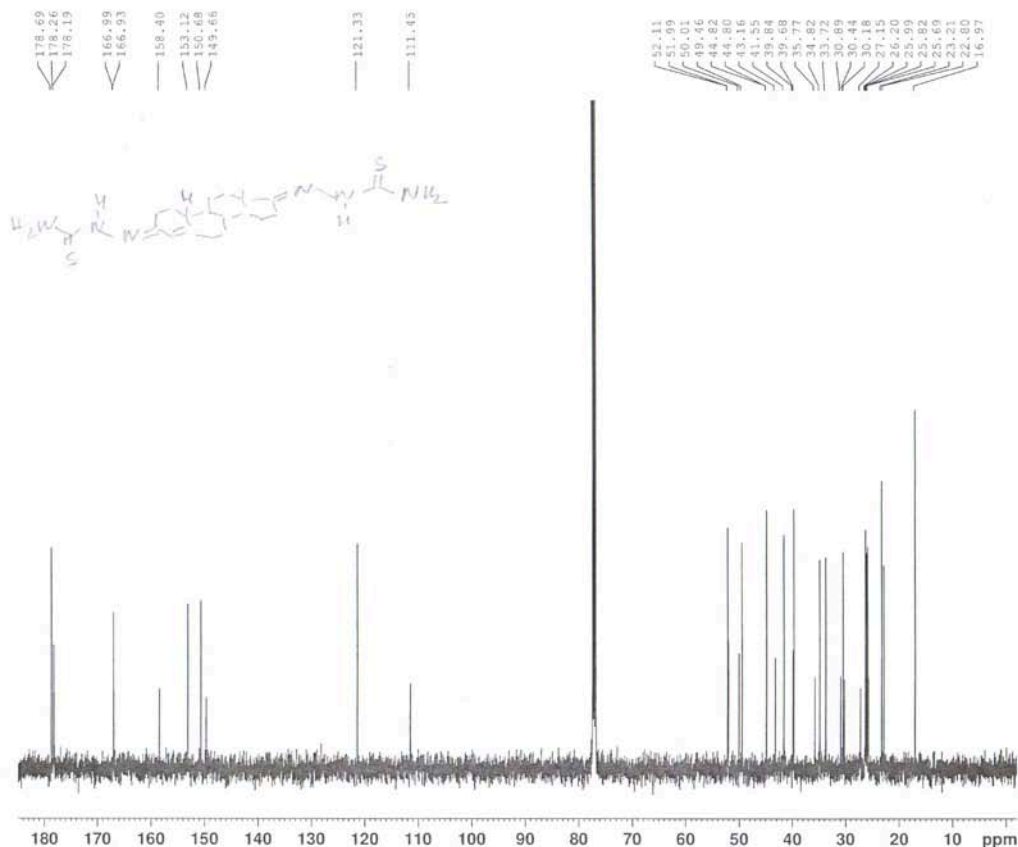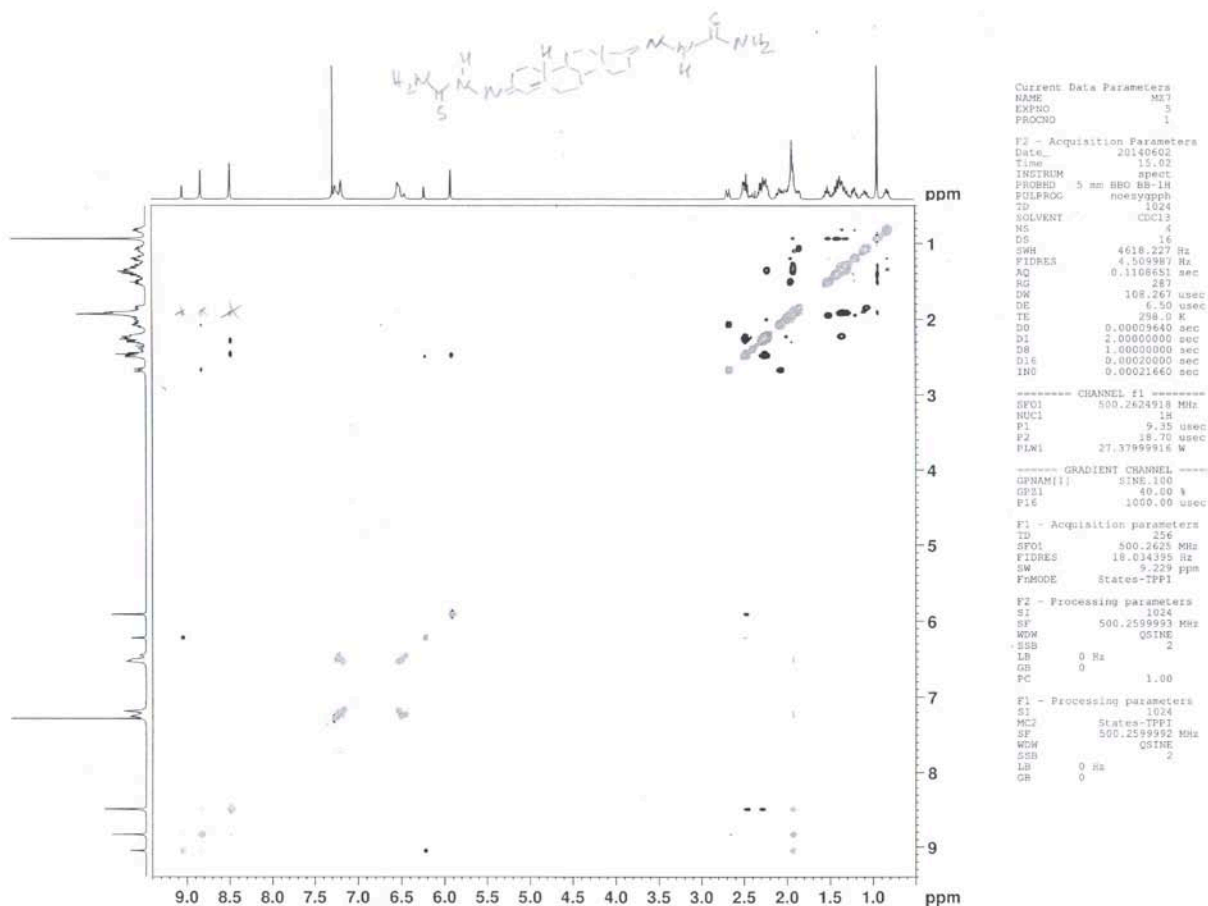

Sample Name: MZ7 Sample Location: P1-C8 Sample Id: Operator: Milka  
 Data File Name: D:\PE Sciex Data\Projects\Sladic\Data\MZ7\_Z\_E\_C18\_RRHT\_5\_MK70V\_pos1.wiff Acq Time: March 24 2014 02:33:18 PM  
 Method: d:\TOF Data\damethods\Night\_Seq\_Comp\_ident1.anm\etc.xml

One or more scans have failed IRM. Review the data file for details.

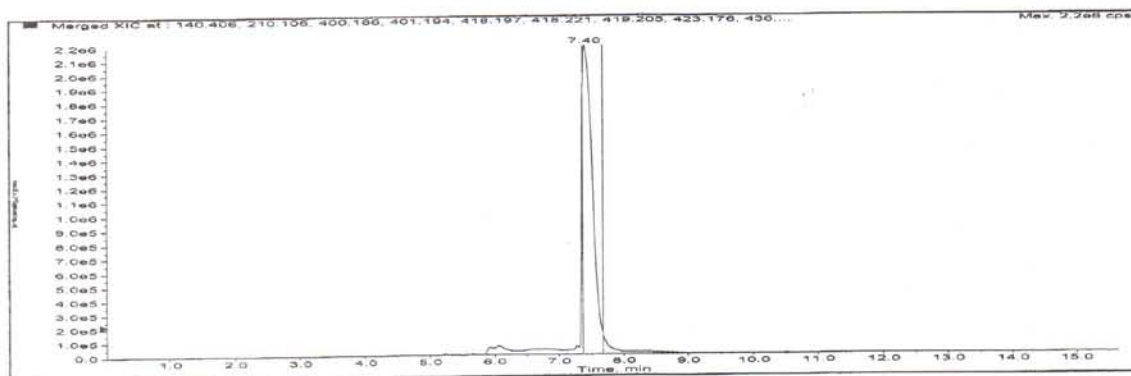

Merged XIC, Period#: 1 Experiment#: 1

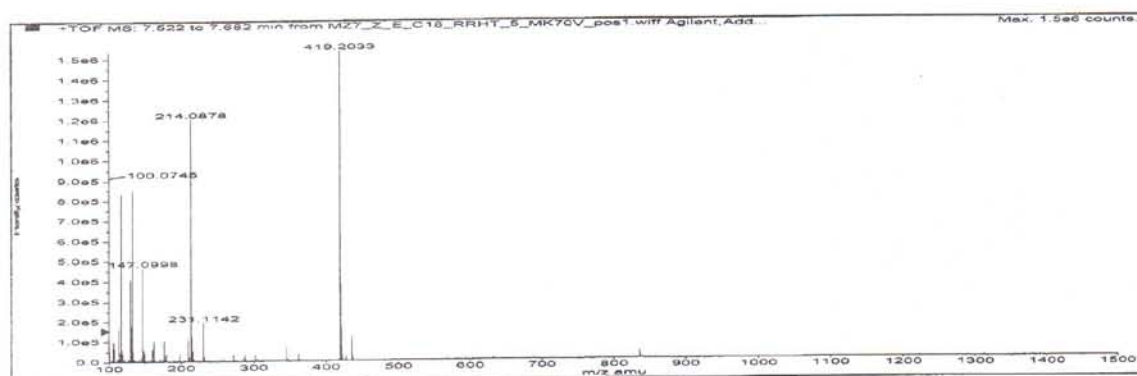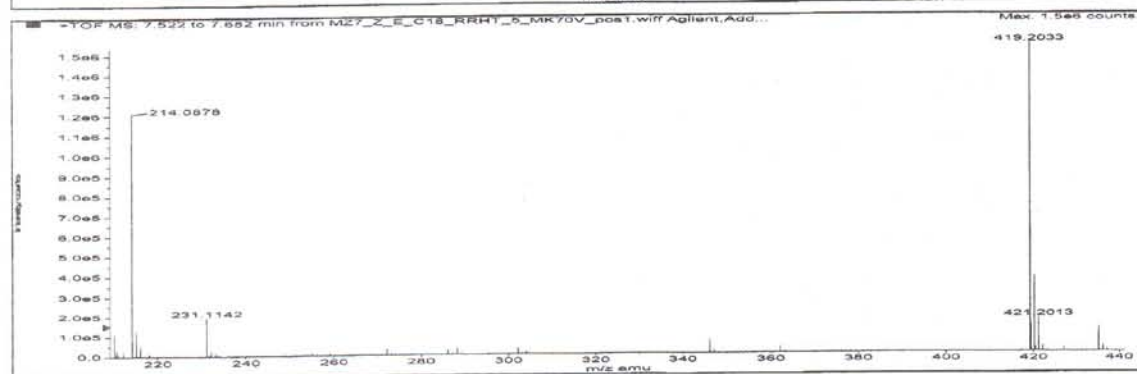

| Formula    | Compound name | Mass      | Peak RT (min) | Peak area  | Description |
|------------|---------------|-----------|---------------|------------|-------------|
| C20H30N6S2 | -             | 418.19734 | 7.40          | 2.50483 E7 | -           |

| Species              | Abundance (counts) | Ion Mass  | Measured Mass | Error (mDa) | Error (ppm) | Ret. Time Error (min) |
|----------------------|--------------------|-----------|---------------|-------------|-------------|-----------------------|
| [M+2H] <sup>2+</sup> | 110876.65          | 210.10594 | 210.10428     | -1.66827    | -7.94       |                       |
| [M+H] <sup>+</sup>   | 1536715.77         | 419.20461 | 419.20335     | -1.26756    | -3.02       |                       |
| [M+NH4] <sup>+</sup> | 29241.75           | 436.23116 | 436.20049     | -30.67147   | -70.32      |                       |

OK, MZ

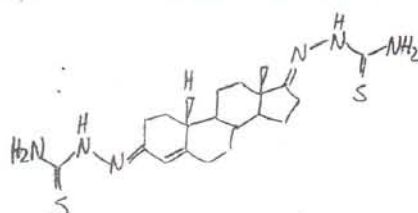

## Compound 4a

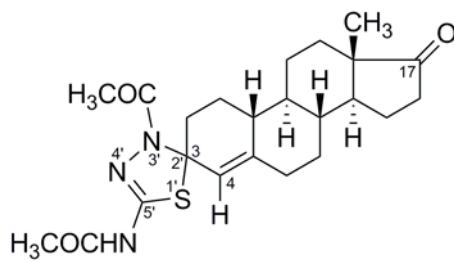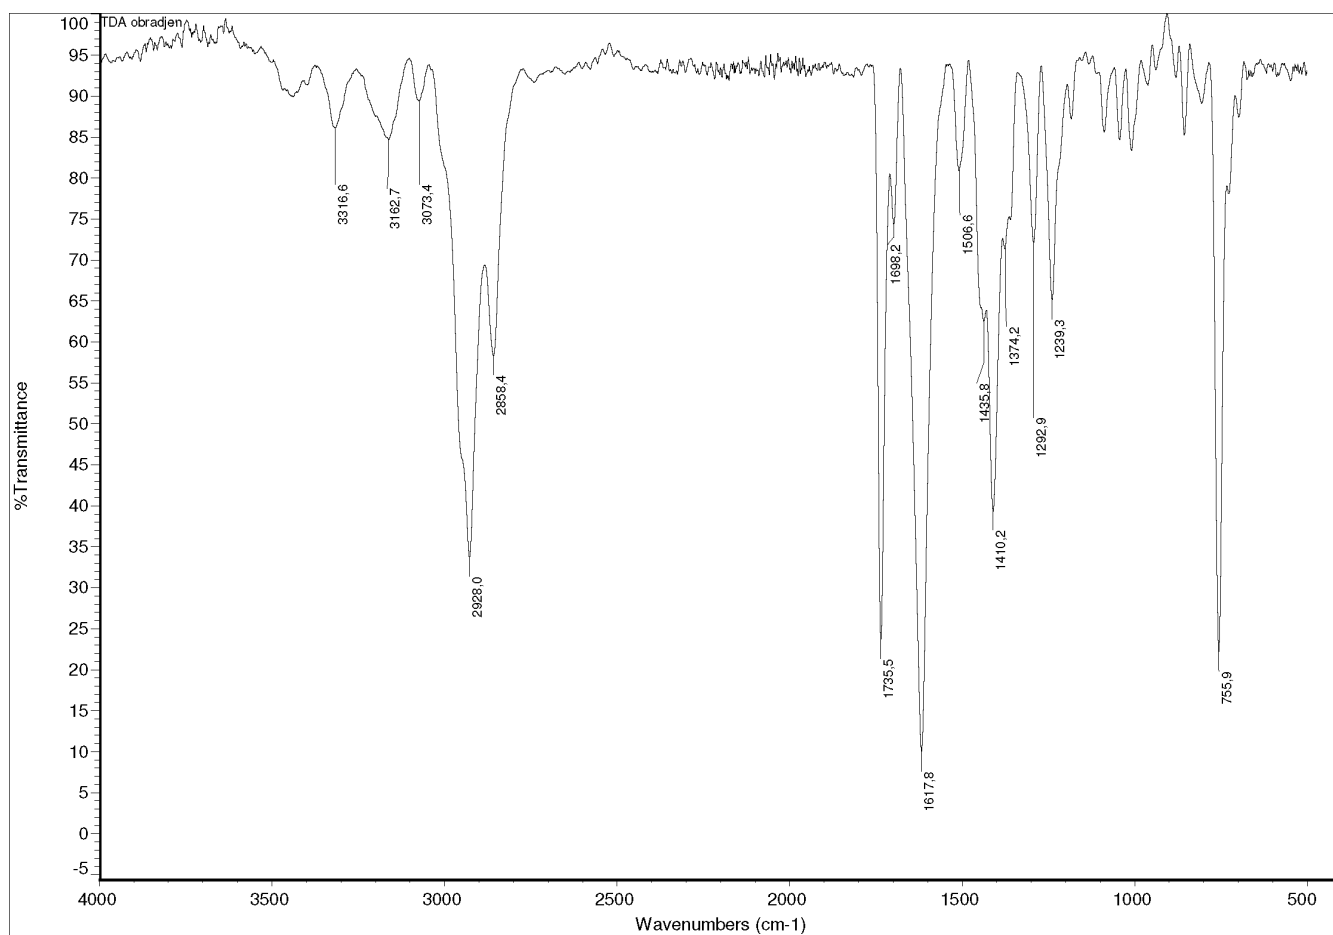

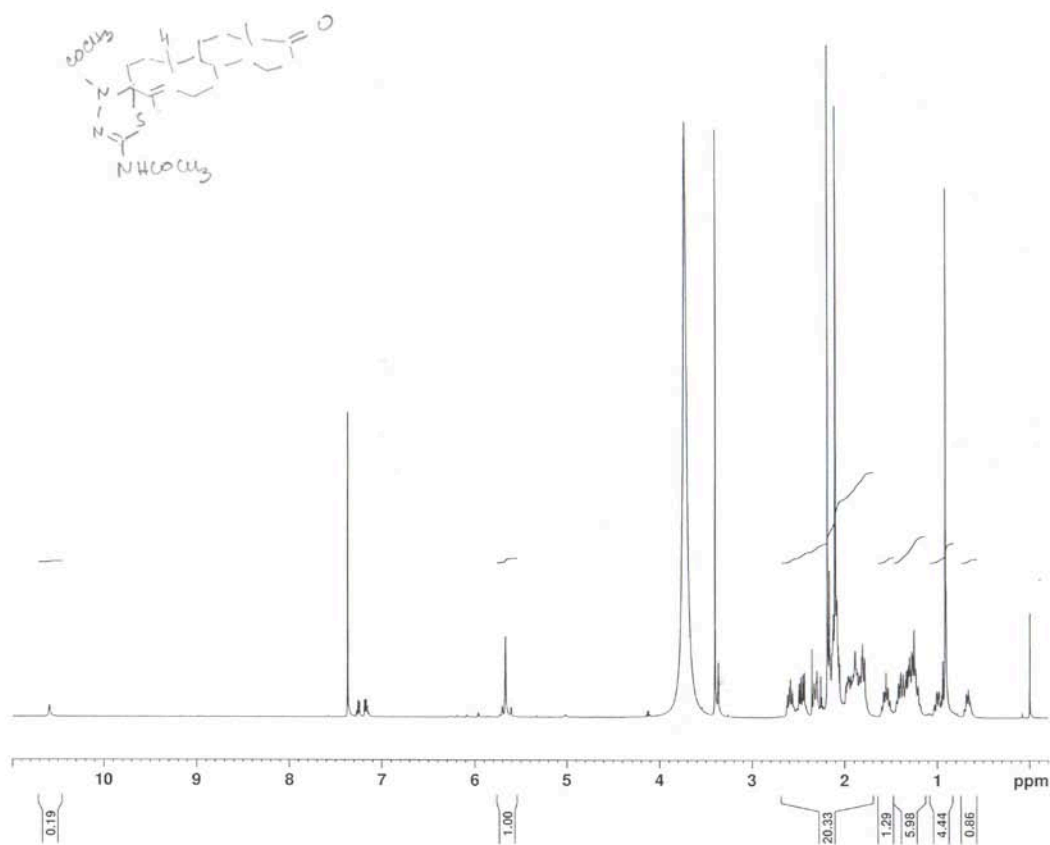

Current Data Parameters

|        |      |
|--------|------|
| NAME   | MZ11 |
| EXPNO  | 1    |
| PROCNO | 1    |

F2 - Acquisition Parameters

|         |                |
|---------|----------------|
| Date_   | 20140604       |
| Time    | 14.30          |
| INSTRUM | spnc           |
| PROBHD  | 5 mm BBO BB-1H |
| PULPROG | zg30           |
| TD      | 32768          |
| SOLVENT | CDCl3          |
| NS      | 32             |
| DS      | 0              |
| SWH     | 6127.451 Hz    |
| FIDRES  | 0.186995 Hz    |
| AQ      | 2.6738689 sec  |
| RG      | 128            |
| DW      | 81.600 usec    |
| DE      | 8.50 usec      |
| TE      | 298.0 K        |
| D1      | 2.00000000 sec |
| TDC     | 1              |

===== CHANNEL f1 =====

|      |                 |
|------|-----------------|
| SFO1 | 500.2626919 MHz |
| NUC1 | 1H              |
| P1   | 9.15 usec       |
| PLW1 | 27.37999916 W   |

F2 - Processing parameters

|     |                 |
|-----|-----------------|
| SI  | 32768           |
| SF  | 500.2599573 MHz |
| WDW | EM              |
| SSB | 0               |
| LB  | 0.20 Hz         |
| CB  | 0               |
| PC  | 1.00            |

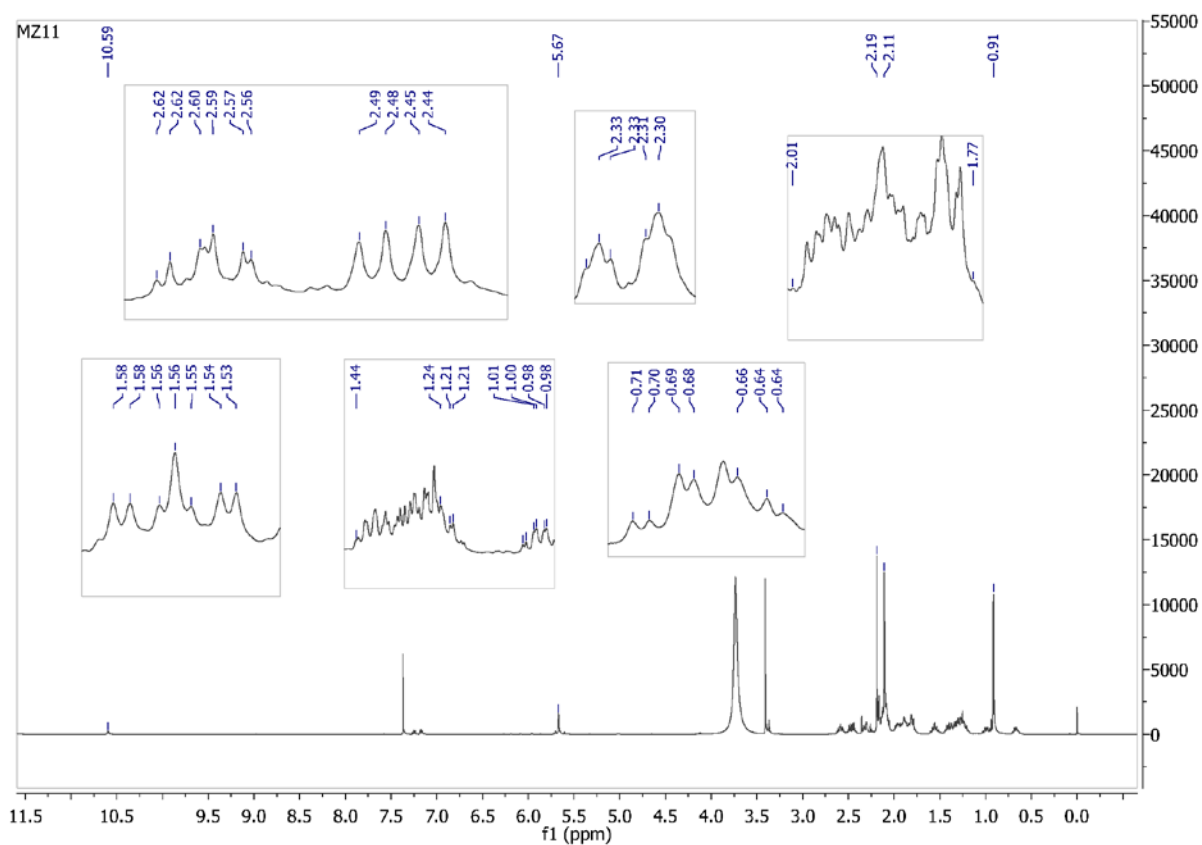

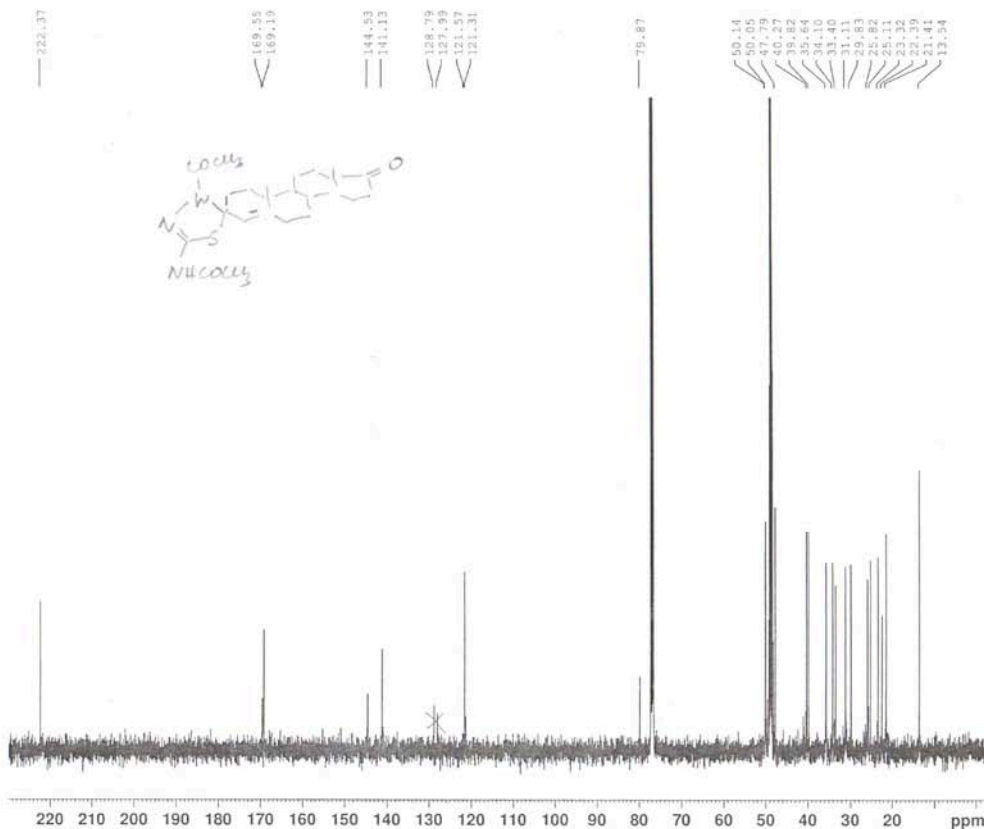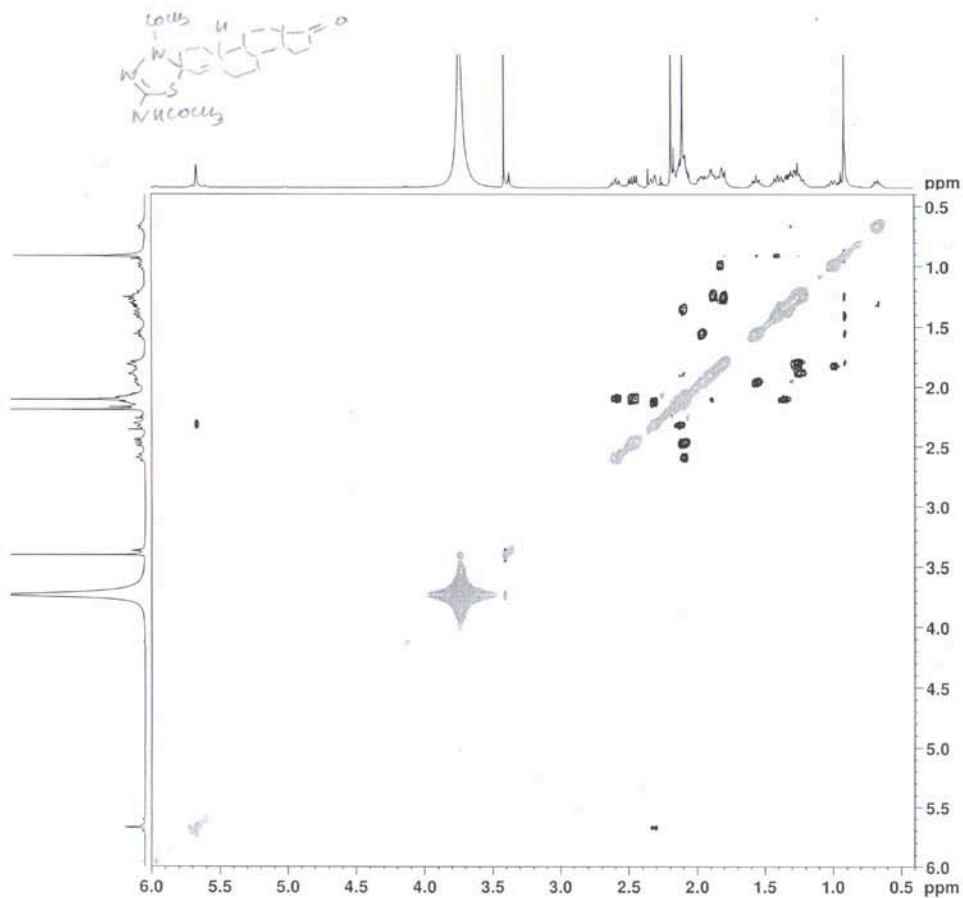

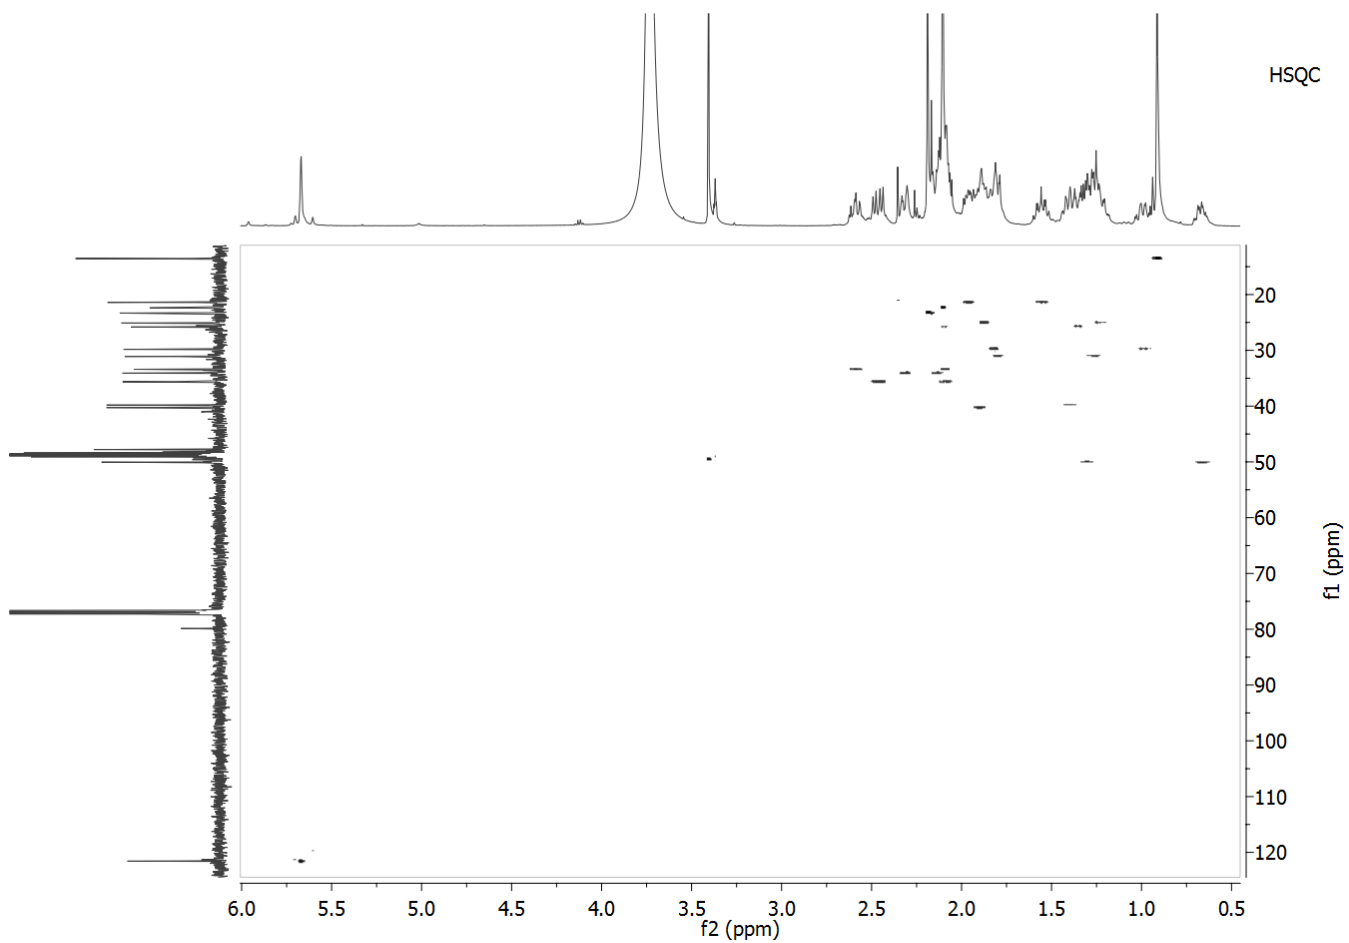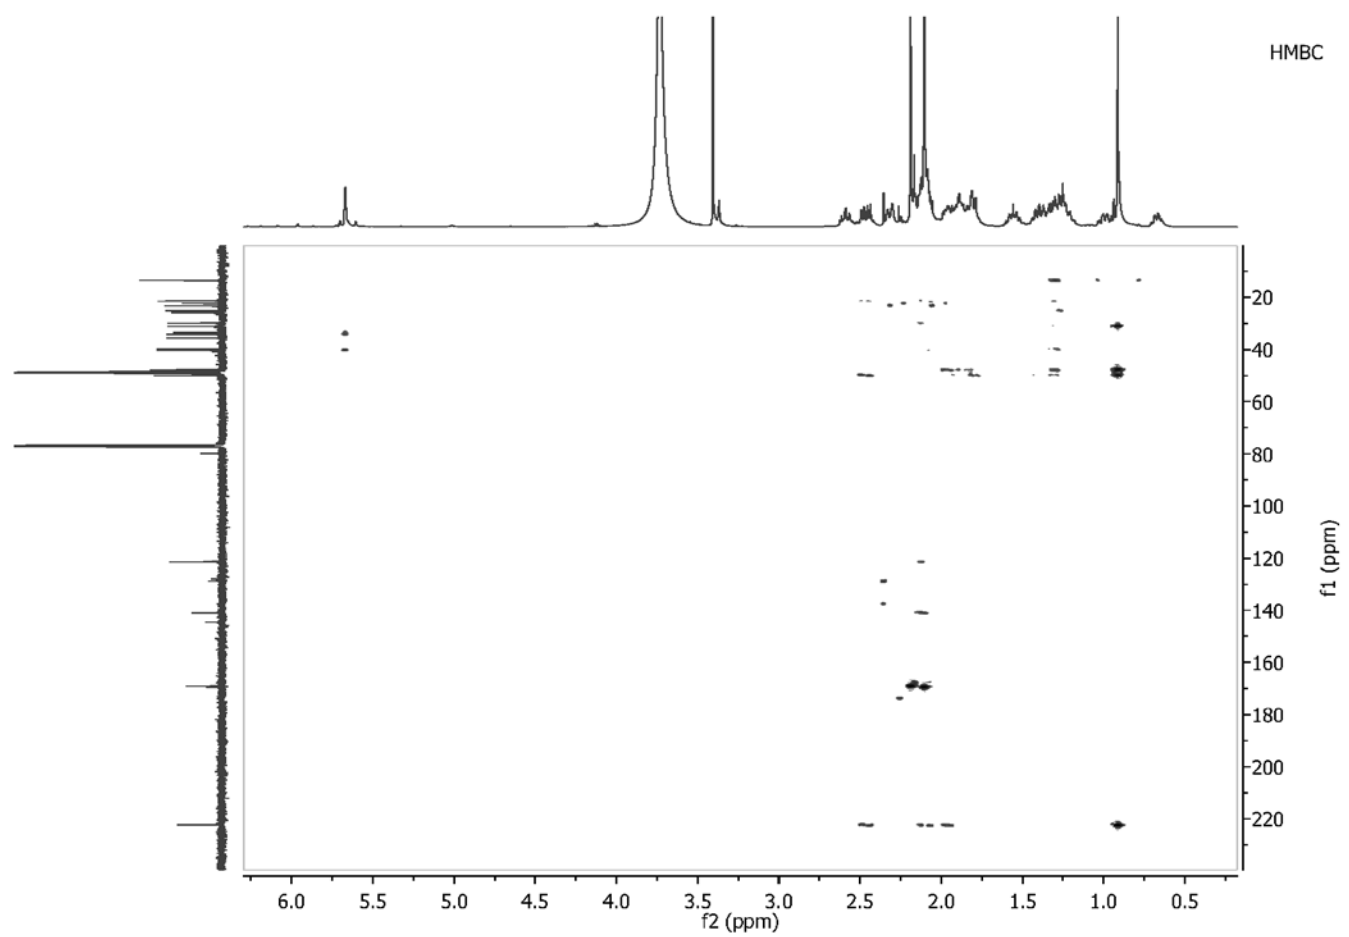

Sample Name: MZ11 Sample Location: P1-C1 Sample Id: Operator: Milka  
 Data File Name: D:\PE Sciex Data\Projects\Sladic\Data\MZ11\_MK70V\_pos1.wiff Acq Time: August 05 2014, 11:15:09 AM  
 Method: d:\TOF\_Data\damethods\Night\_Seq\_Comp\_ident1.anmlfc.xml

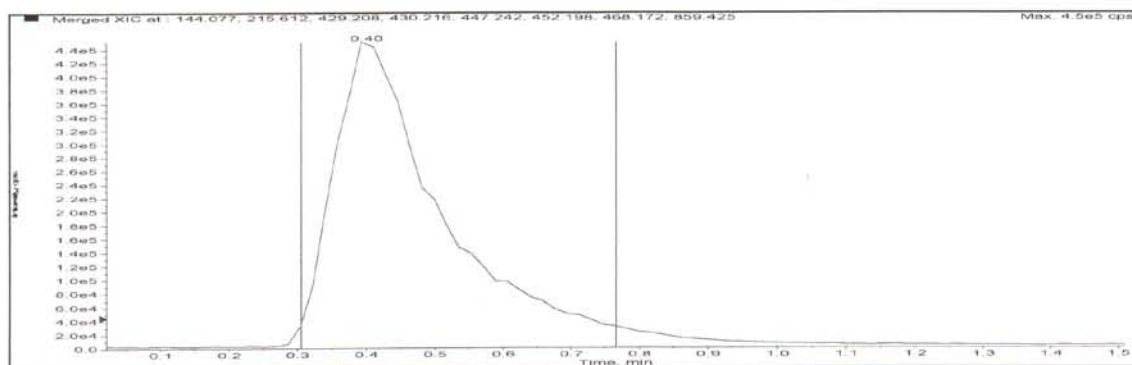

Merged XIC, Period# : 1 Experiment# : 1

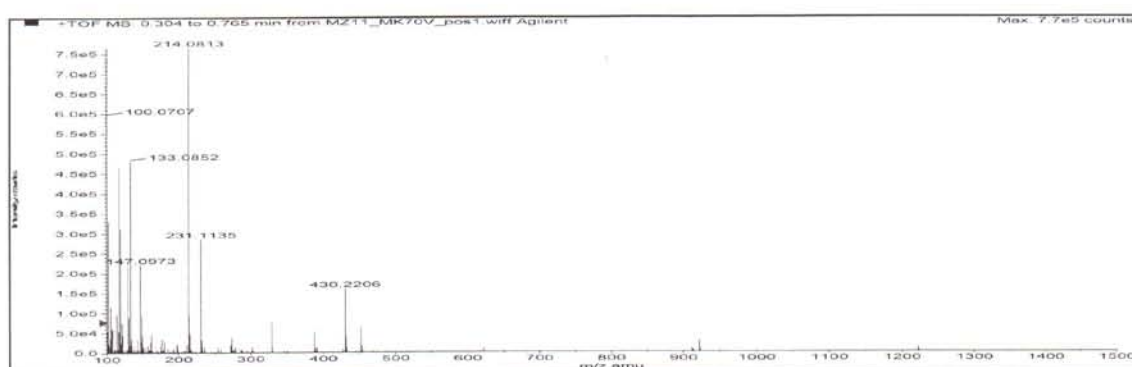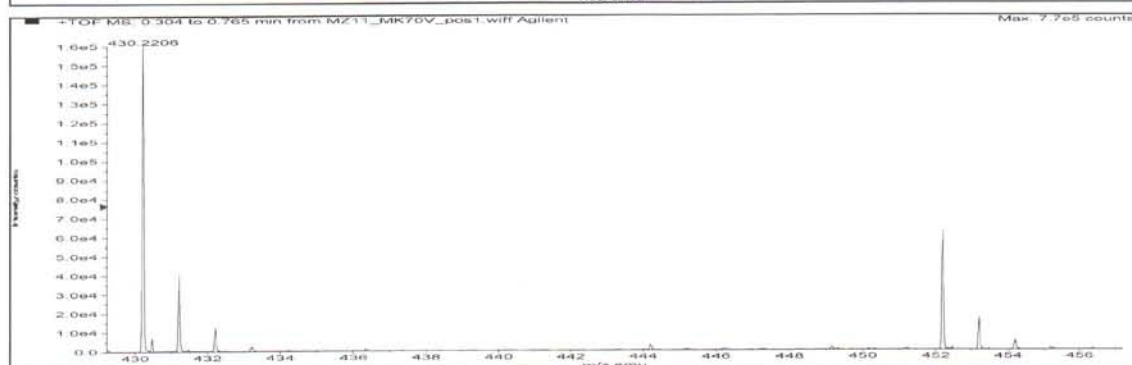

| Formula     | Compound name | Mass      | Peak RT (min) | Peak area  | Description |
|-------------|---------------|-----------|---------------|------------|-------------|
| C23H31N3O3S | —             | 429.20861 | 0.40          | 4.98363 E6 | —           |

| Species             | Abundance (counts) | Ion Mass  | Measured Mass | Error (mDa) | Error (ppm) | Ret. Time Error (min) |
|---------------------|--------------------|-----------|---------------|-------------|-------------|-----------------------|
| [M+H] <sup>+</sup>  | 162128.32          | 430.21589 | 430.21581     | -0.08124    | -0.19       | —                     |
| [M+Na] <sup>+</sup> | 63766.11           | 452.19783 | 452.19790     | 0.06355     | 0.14        | —                     |

## Compound 5a

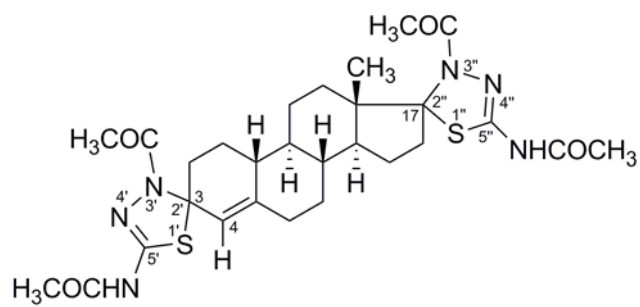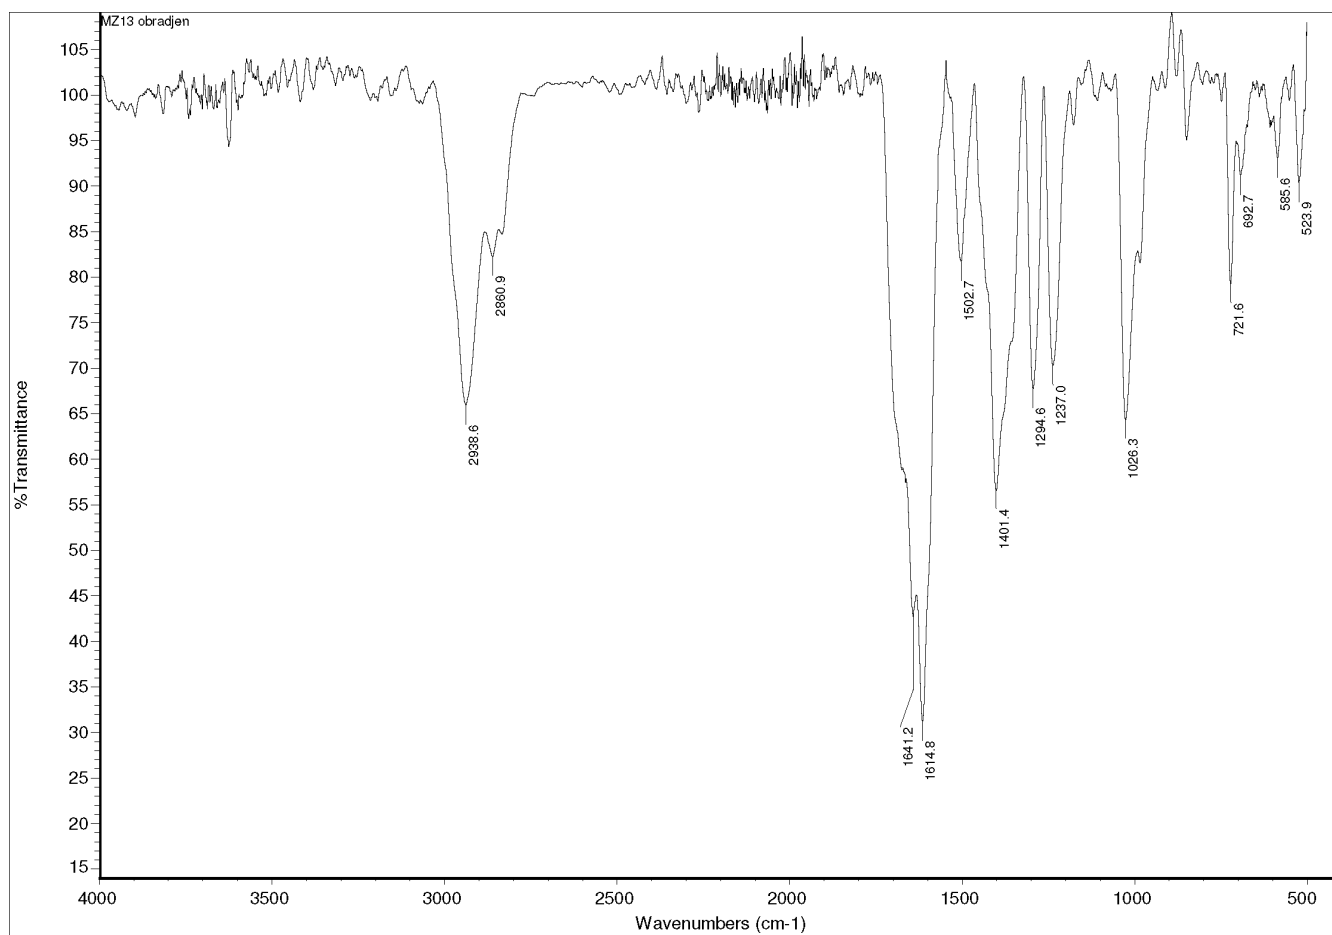

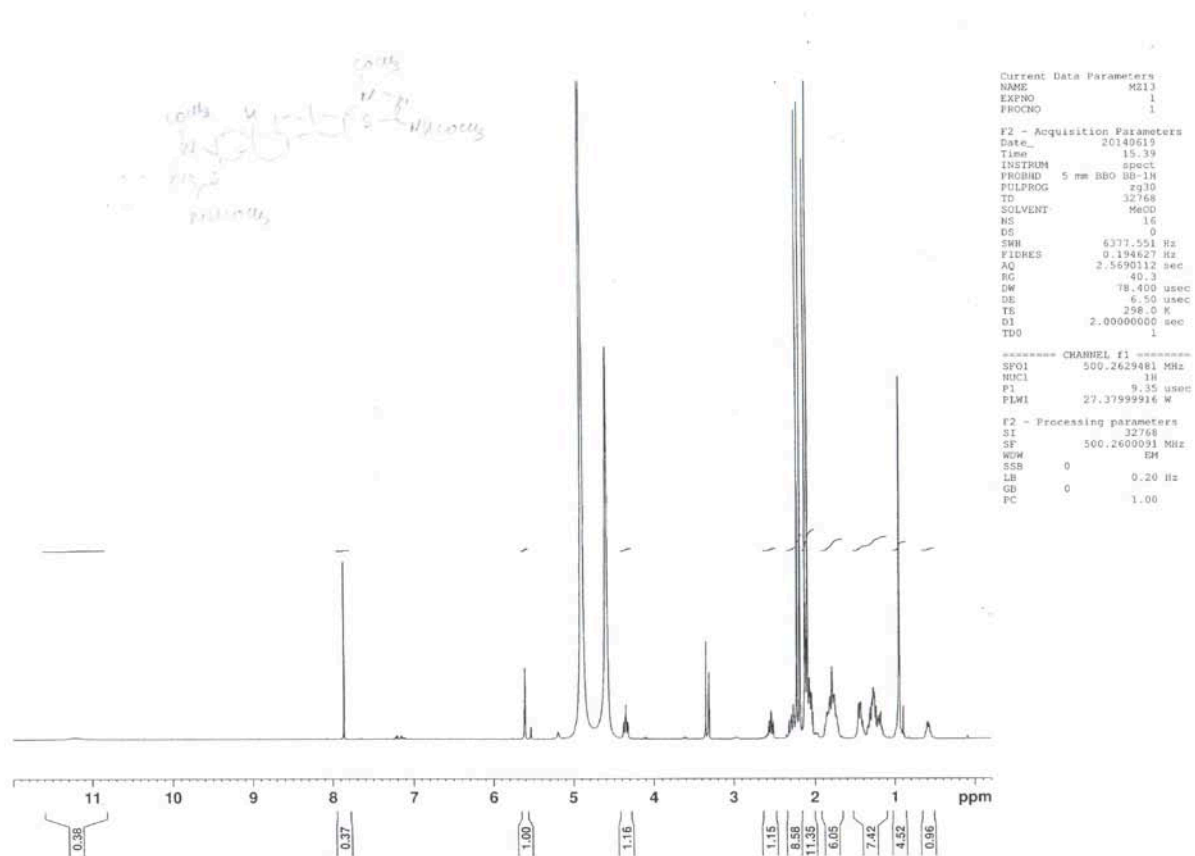

MZ13

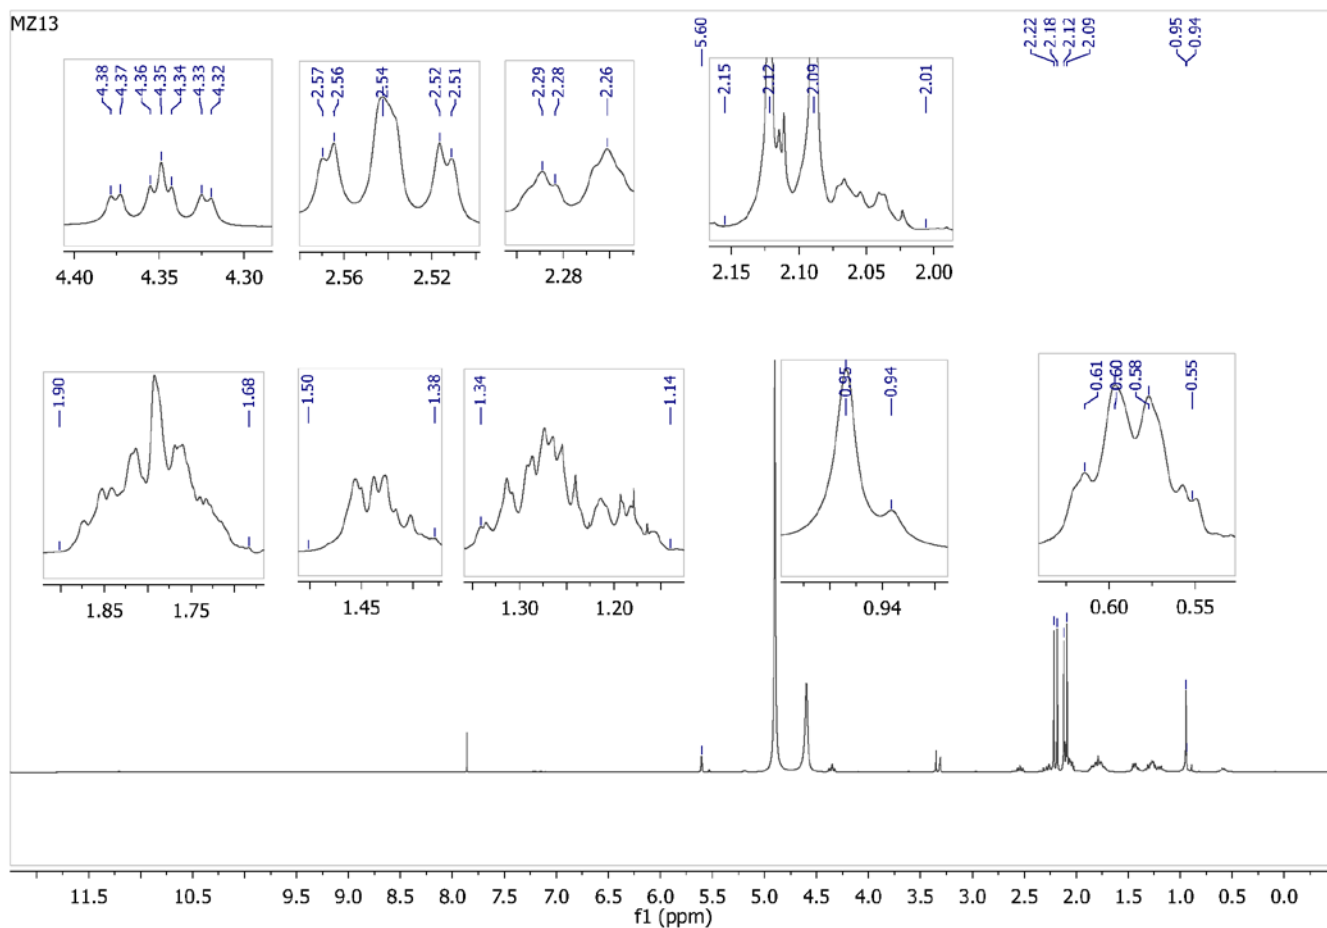

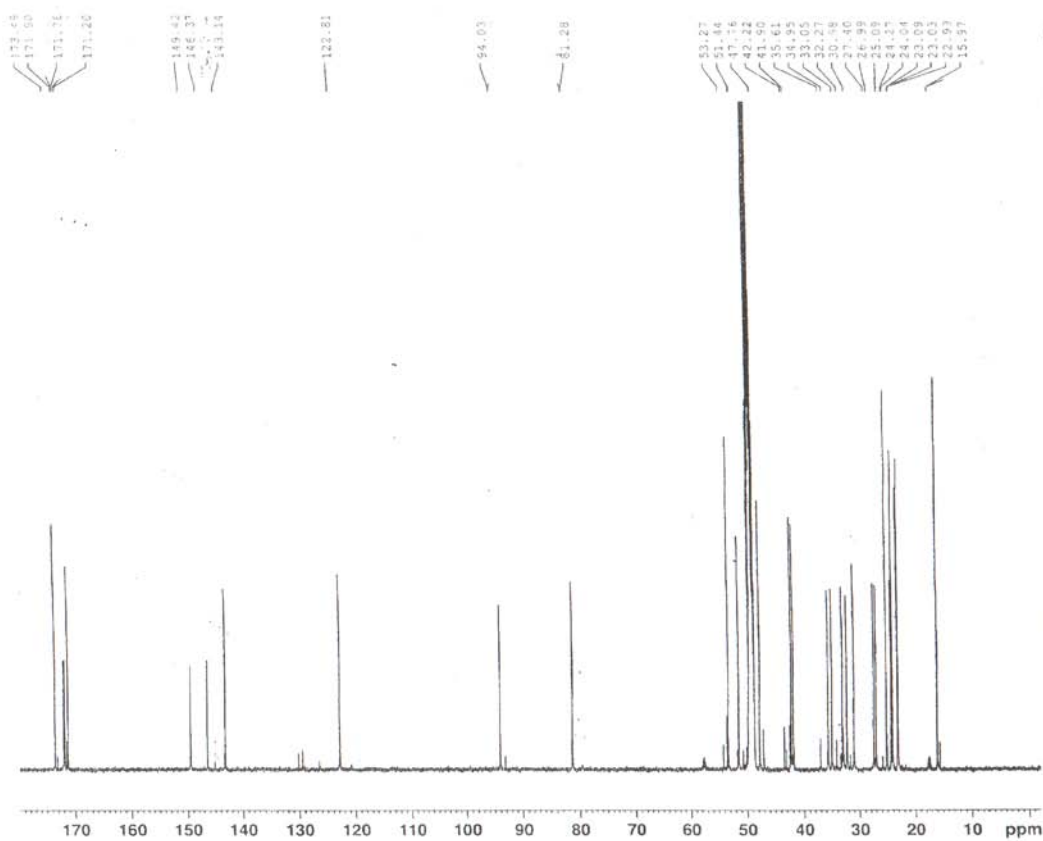

Current Data Parameters  
NAME M213  
EXPNO 6  
PROCNO 1

F2 - Acquisition Parameters  
Date\_ 20140620  
Time 8.53  
INSTRUM spect  
PROBHD 5 mm BBO BB-1H  
PULPROG zgpg30  
TD 32768  
SOLVENT MeOD  
NS 6197  
DS 4  
SWH 32894.738 Hz  
FIDRES 1.003868 Hz  
AQ 0.4980736 sec  
RG 2050  
DW 15.200 usec  
DE 6.50 usec  
TE 298.0 K  
D1 2.00000000 sec  
D11 0.03000000 sec  
TD0 1

===== CHANNEL f1 =====  
SFO1 125.8055719 MHz  
NUC1 13C  
P1 11.50 usec  
PLW1 32.22800064 W

===== CHANNEL f2 =====  
SFO2 500.2629480 MHz  
NUC2 1H  
CPDPRG12 waltz16  
PCPD2 80.00 usec  
PLW2 20.77000046 W  
PLW12 0.39267001 W  
PLW13 0.25130999 W

F2 - Processing parameters  
SI 32768  
SF 125.7902920 MHz  
WDW EM  
SSB 0  
LB 1.50 Hz  
GB 0  
PC 1.40

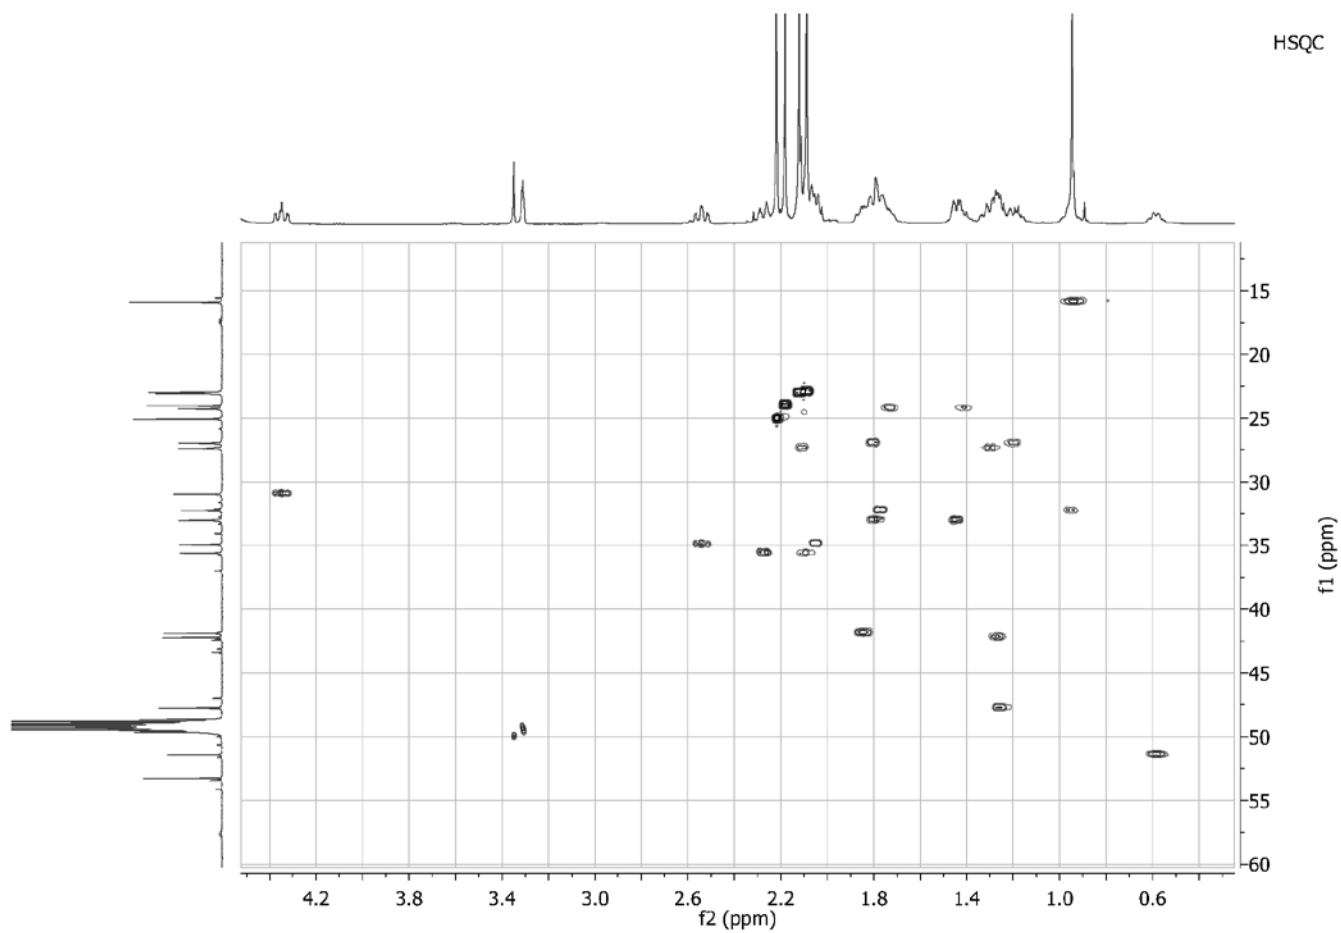

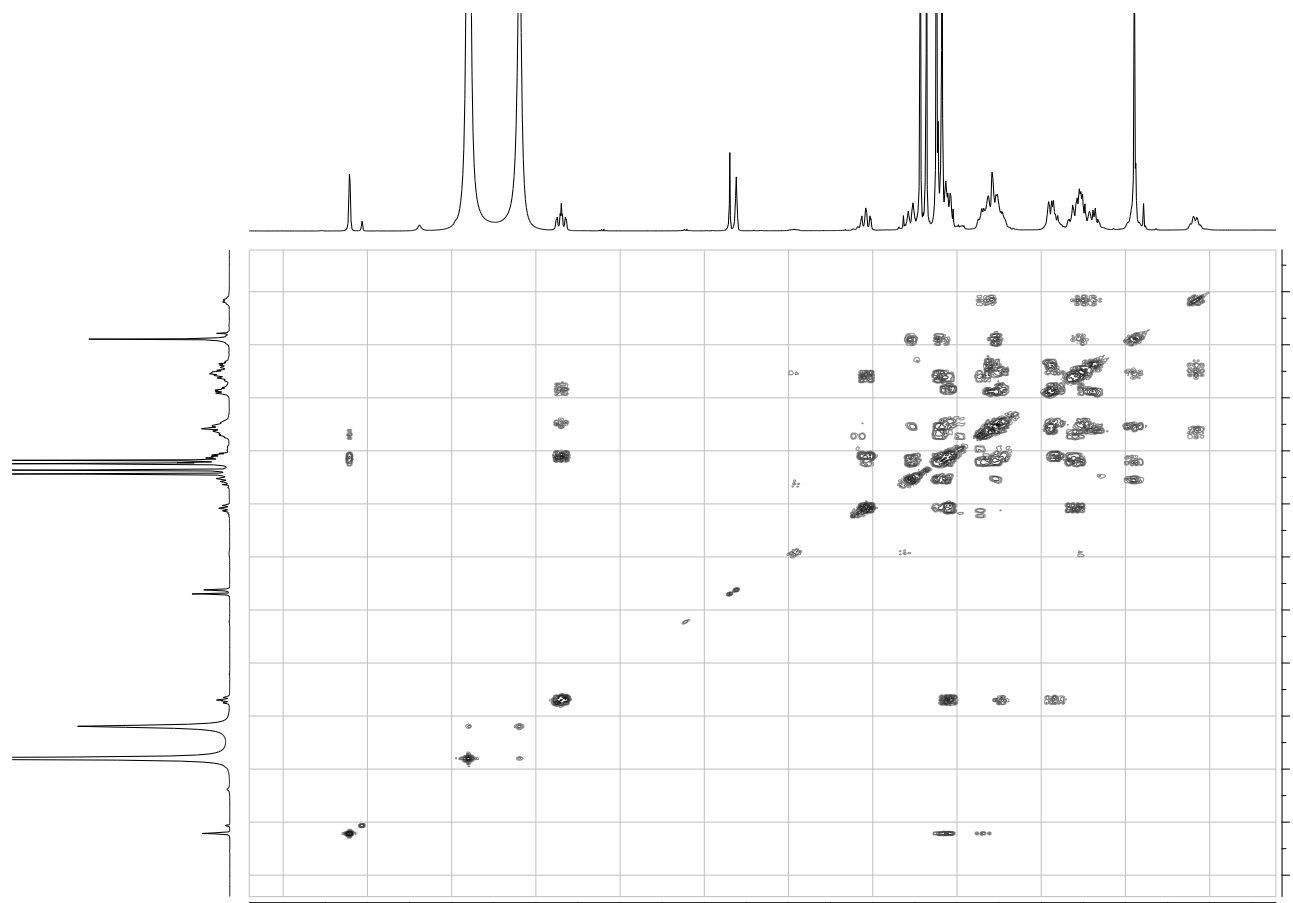

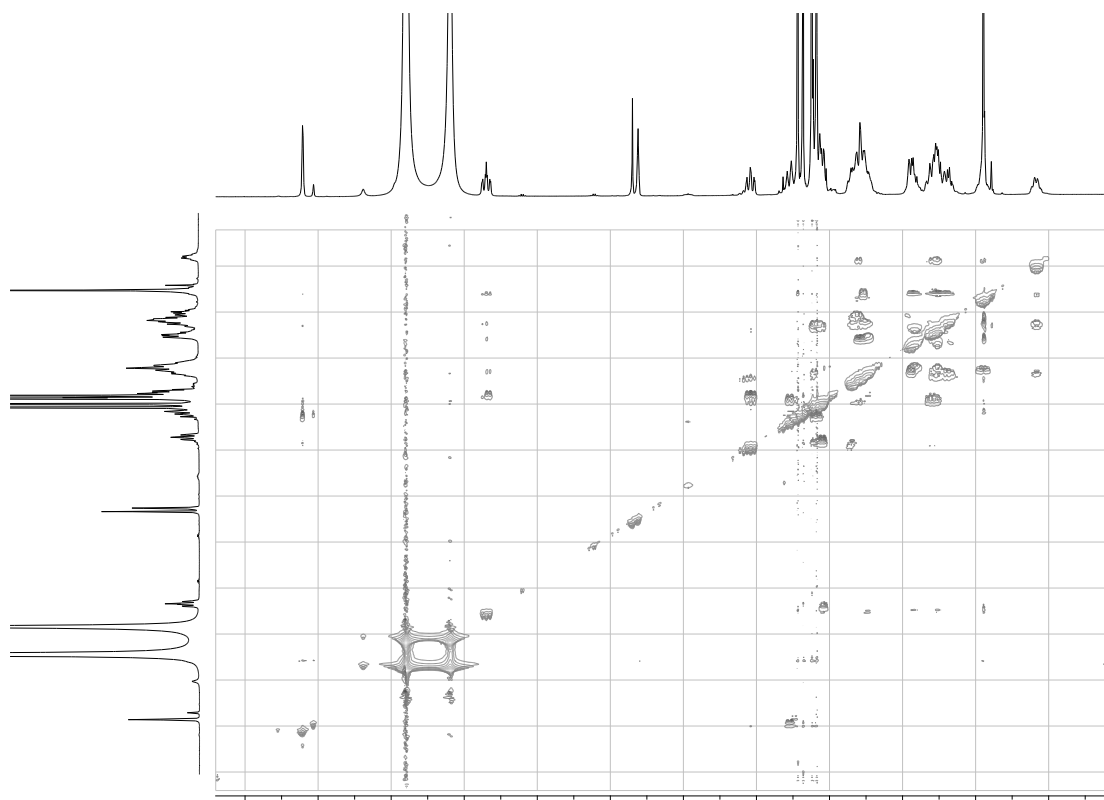

ROESY

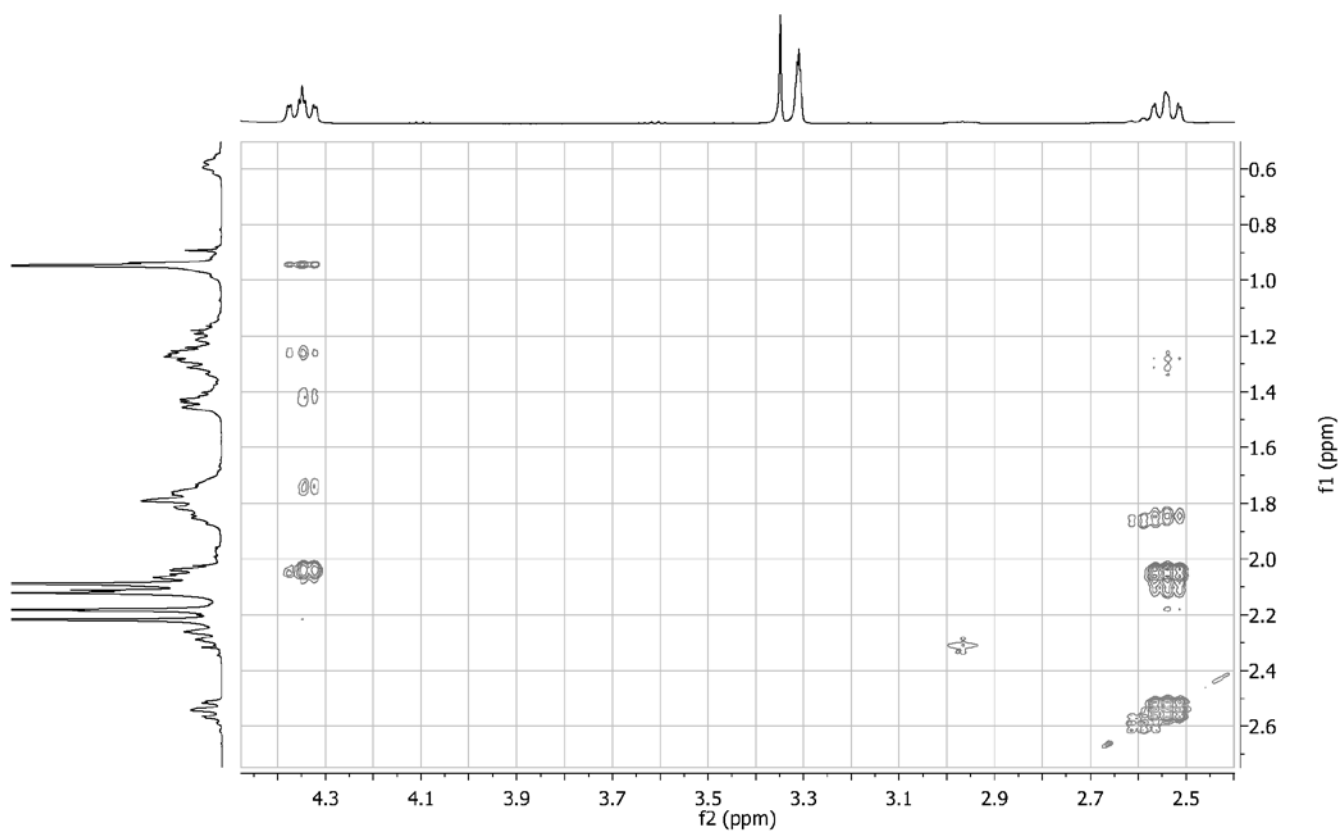

Sample Name: MZ13 Sample Location: P1-C3 Sample Id: Operator: Milka  
 Data File Name: D:\PE Sciex Data\Projects\Sladic\Data\MZ13\_MK70V\_pos1.wiff Acq Time: August 05 2014, 11:20:27 AM  
 Method: d:\TOF\_Data\damethods\Night\_Seq\_Comp\_ident1.anm\efc.xml

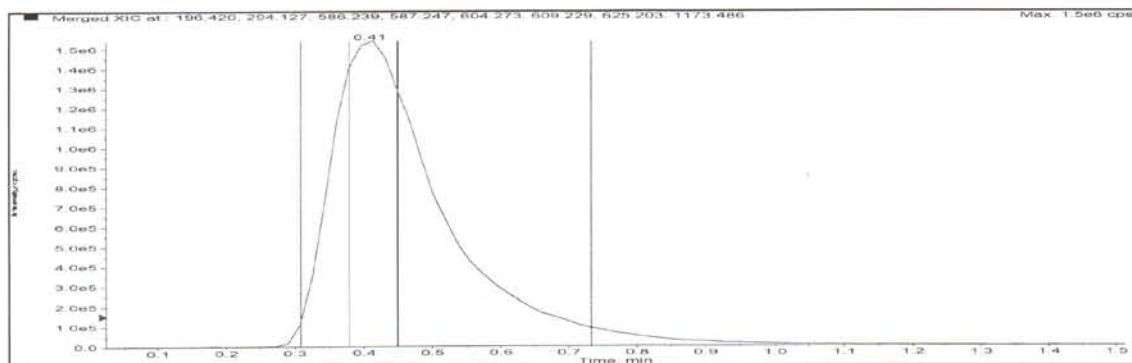

Merged XIC, Period# : 1 Experiment# : 1

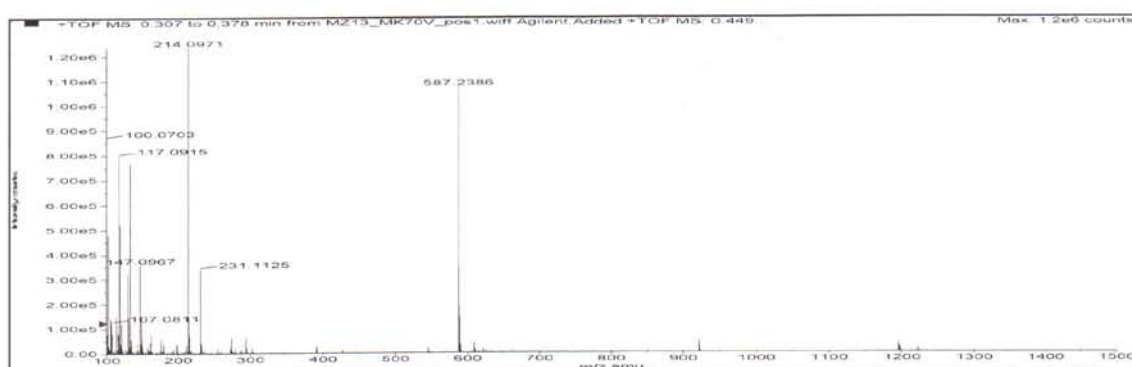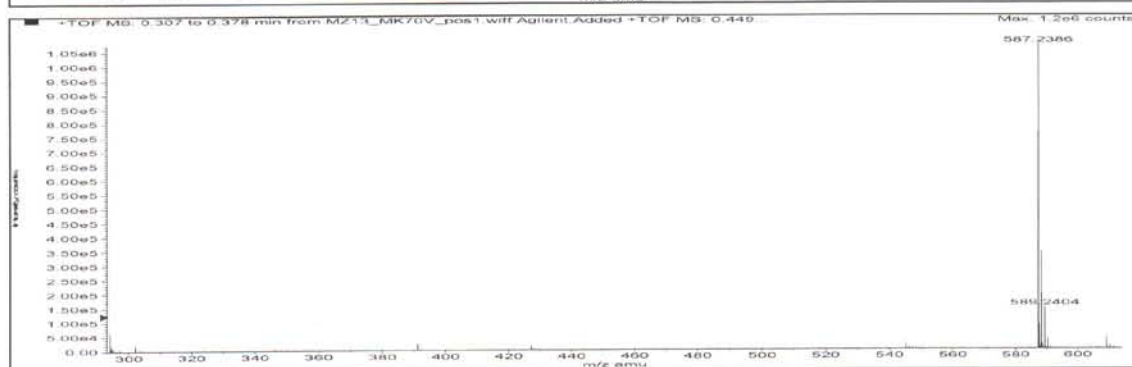

| Formula                                                                      | Compound name | Mass      | Peak RT (min) | Peak area  | Description |
|------------------------------------------------------------------------------|---------------|-----------|---------------|------------|-------------|
| C <sub>28</sub> H <sub>38</sub> N <sub>6</sub> O <sub>4</sub> S <sub>2</sub> | --            | 586.23960 | 0.41          | 1.72010 E7 | --          |

| Species              | Abundance (counts) | Ion Mass  | Measured Mass | Error (mDa) | Error (ppm) | Ret. Time Error (min) |
|----------------------|--------------------|-----------|---------------|-------------|-------------|-----------------------|
| [M+2H] <sup>2+</sup> | 63313.91           | 294.12707 | 294.12704     | -0.03354    | -0.11       | --                    |
| [M+H] <sup>+</sup>   | 1100522.81         | 587.24687 | 587.24700     | 0.12510     | 0.21        | --                    |
| [M+Na] <sup>+</sup>  | 43472.35           | 609.22882 | 609.22878     | -0.03344    | -0.05       | --                    |

### Compound 2b

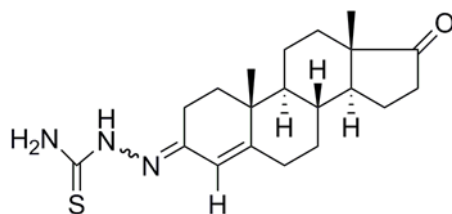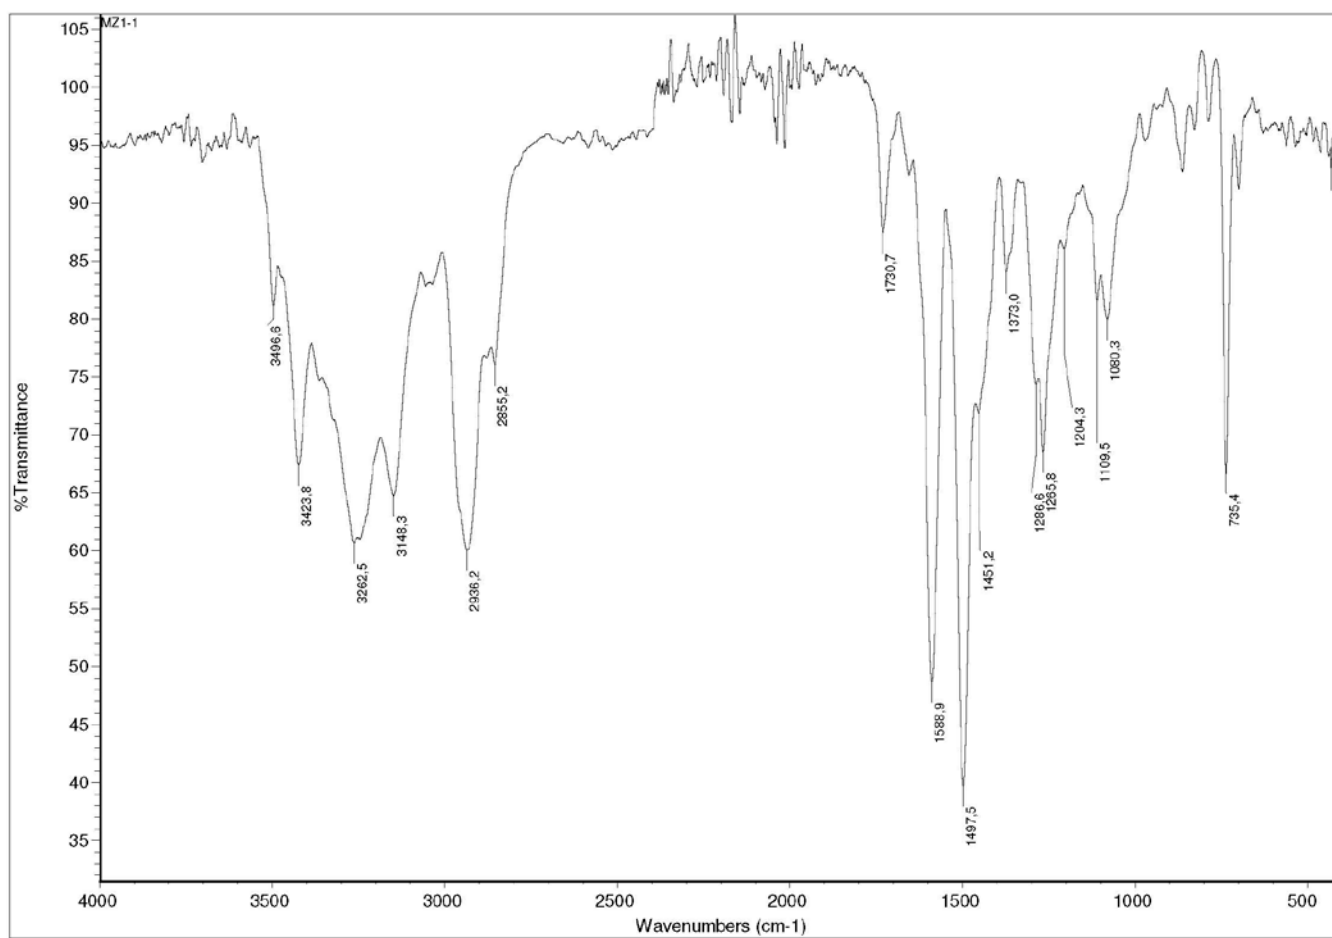



Sample Name: MZ1 Sample Location: P1-C4 Sample Id: Operator: Milka  
 Data File Name: D:\PE Sciex Data\Projects\Sladic\Data\MZ1\_Z\_E\_C18\_RRH\_5\_MK70V\_pos1.wiff Acq Time: March 24 2014 01:14:01 PM  
 Method: d:\TOF\_Data\damethods\Night\_Seq\_Comp\_ident1.anm\efc.xml

One or more scans have failed IRM. Review the data file for details.

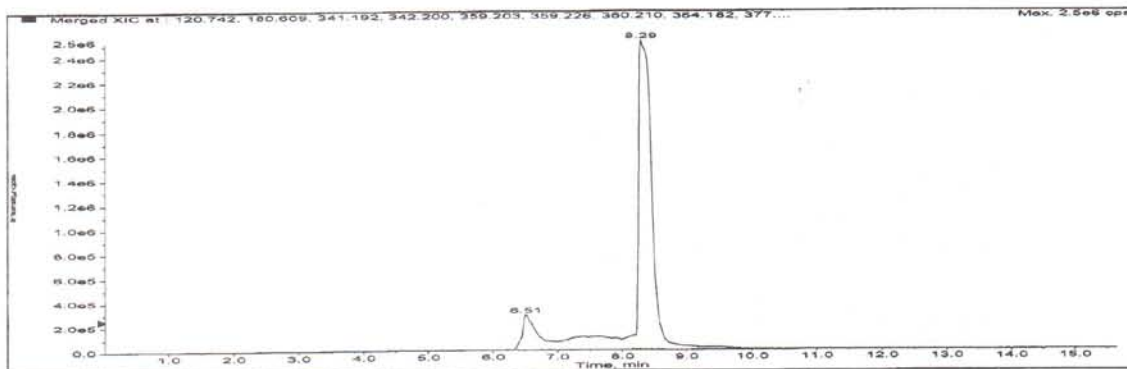

Merged XIC, Period# : 1 Experiment# : 1

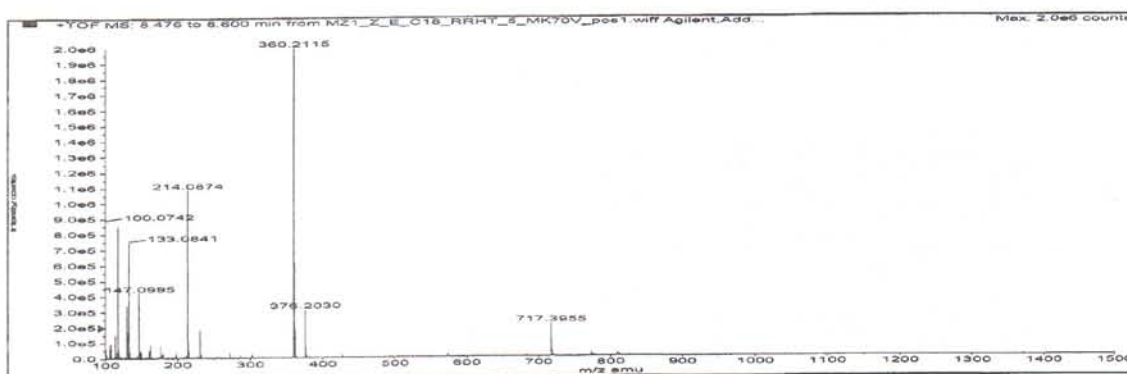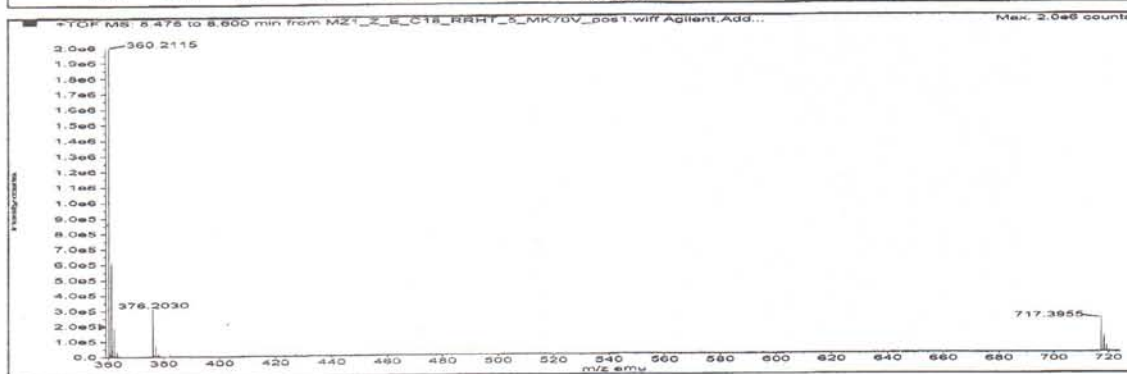

| Formula                                                       | Compound name | Mass      | Peak RT (min) | Peak area  | Description |
|---------------------------------------------------------------|---------------|-----------|---------------|------------|-------------|
| C <sub>20</sub> H <sub>29</sub> N <sub>3</sub> O <sub>3</sub> | --            | 359.20313 | 8.29          | 3.29119 E7 | --          |

| Species                           | Abundance (counts) | Ion Mass  | Measured Mass | Error (mDa) | Error (ppm) | Ret. Time Error (min) |
|-----------------------------------|--------------------|-----------|---------------|-------------|-------------|-----------------------|
| [M+H] <sup>+</sup>                | 2118045.71         | 360.21041 | 360.21148     | 1.07232     | 2.98        | --                    |
| [M+NH <sub>4</sub> ] <sup>+</sup> | 71633.36           | 377.23696 | 377.20593     | -31.02970   | -82.26      | --                    |
| [2M+H] <sup>+</sup>               | 41919.78           | 719.41354 | 719.39735     | -16.19003   | -22.50      | --                    |

OK, MZ

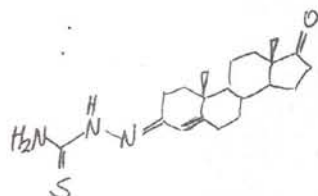

## Compound 3b

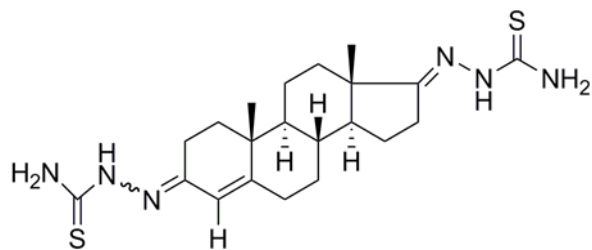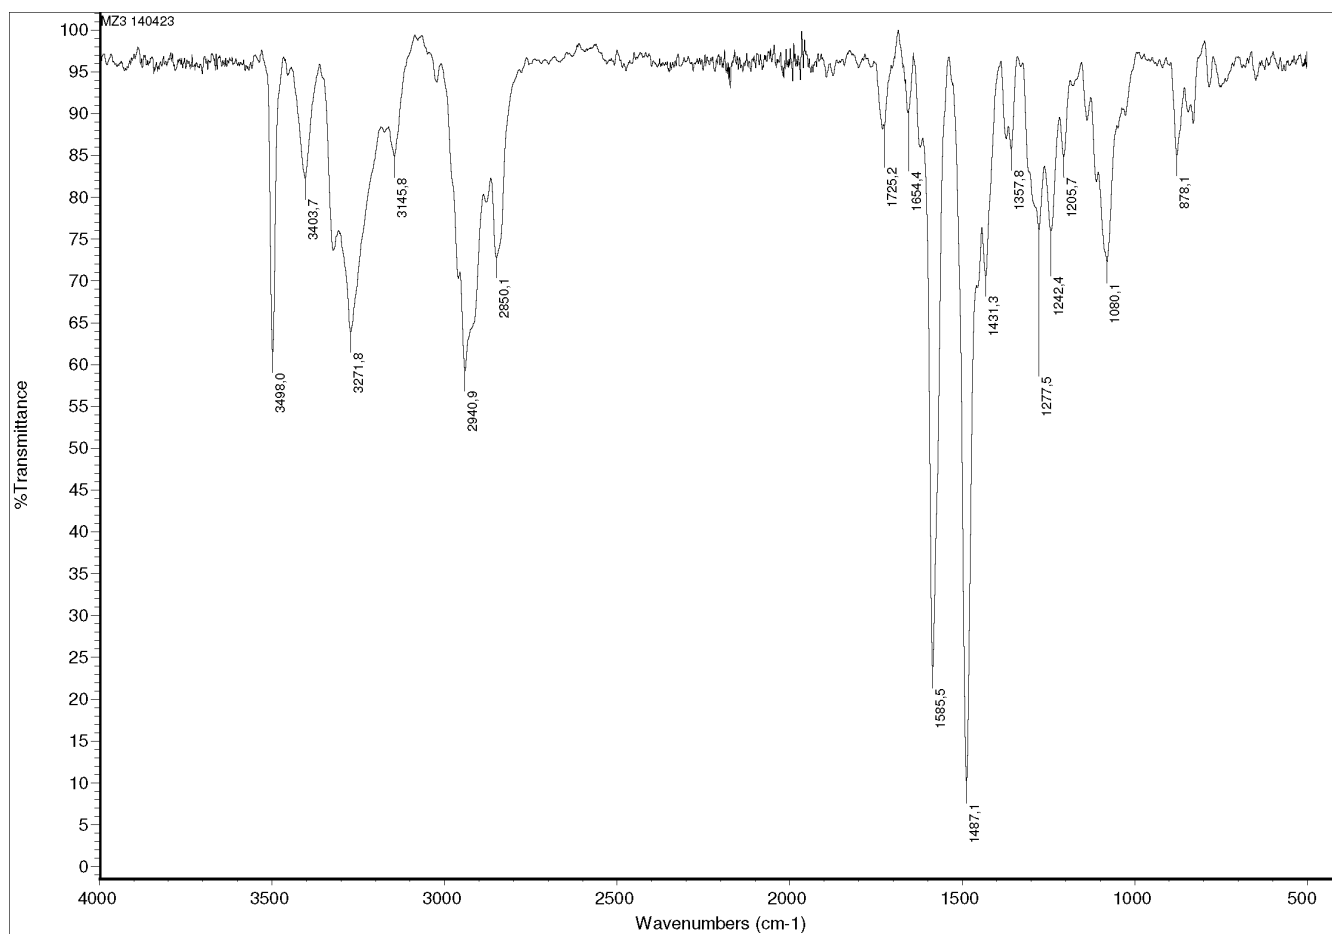

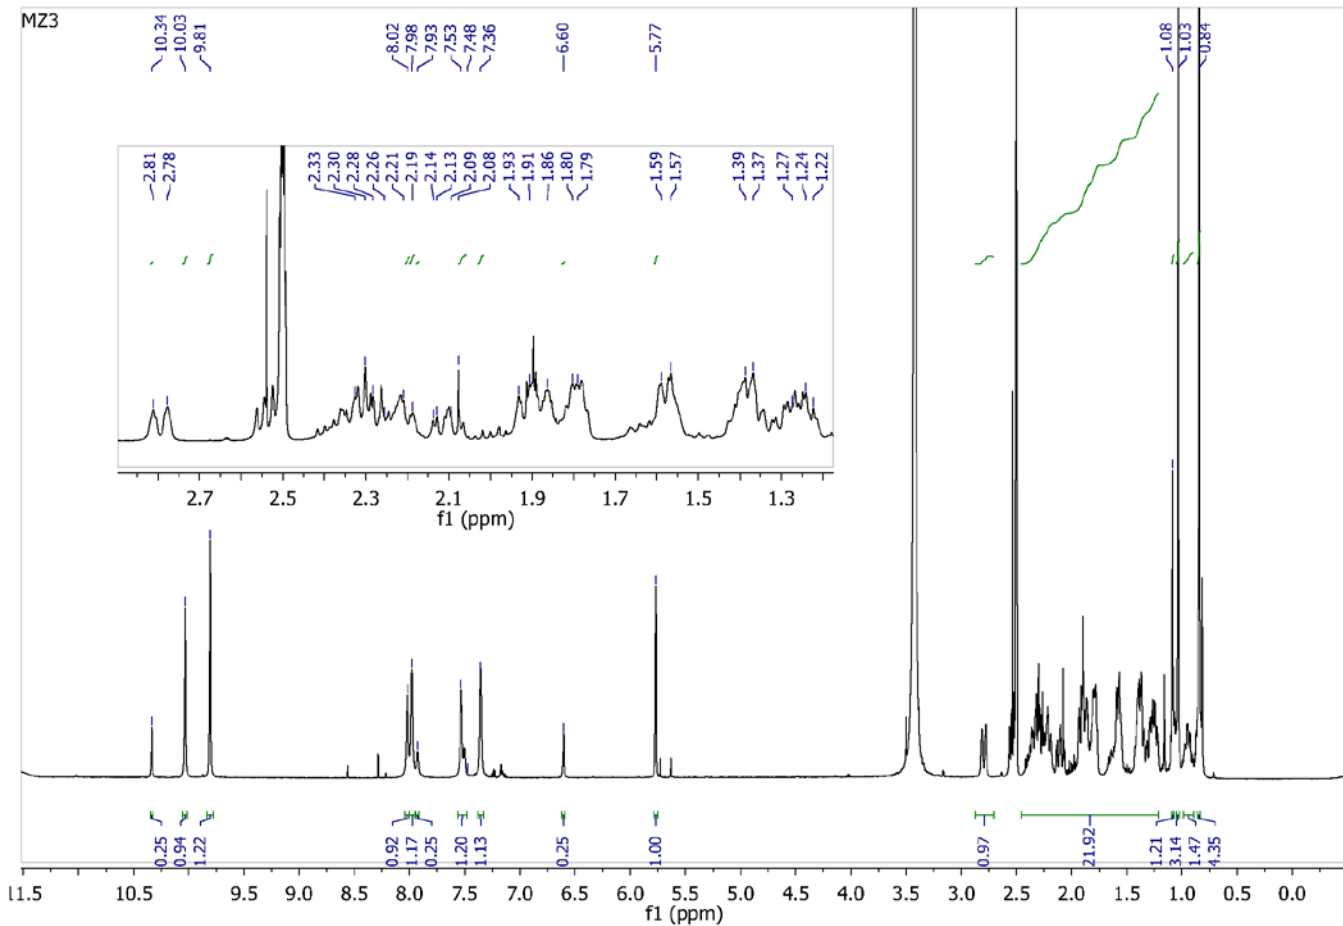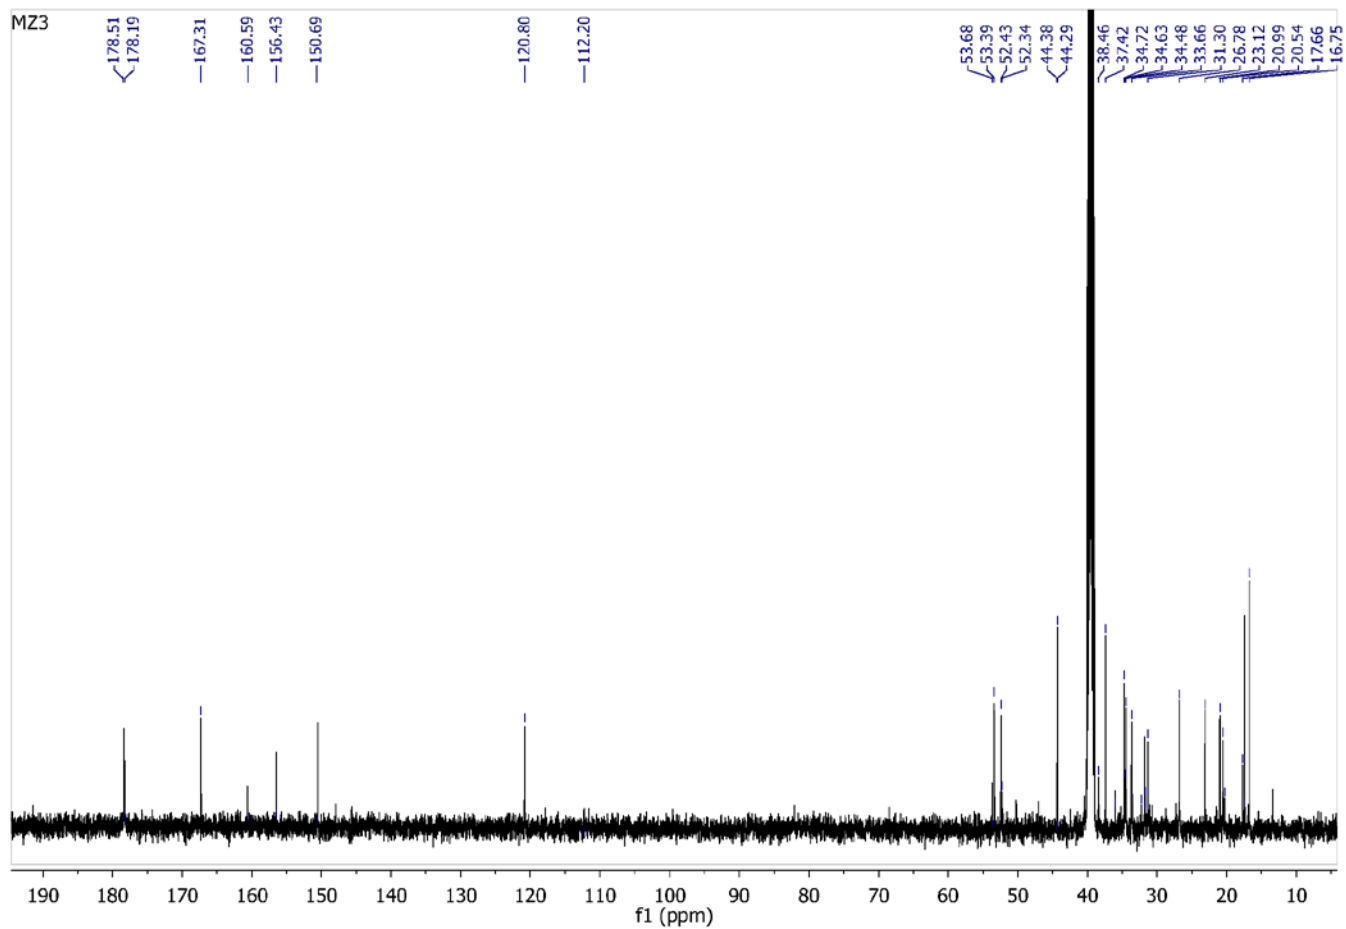

MZ3

Sample Name: MZ1-1 Sample Location: P1-C5 Sample Id: Operator: Milka  
 Data File Name: D:\PE Sciex Data\Projects\Sladic\Data\MZ1-1\_Z\_E\_C18\_RRHT\_5\_MK70V\_pos1.wiff Acq Time: March 24 2014,  
 01:33:50 PM  
 Method: d:\TOF\_Data\damethods\Night\_Seq\_Comp\_ident1.anmlefc.xml

One or more scans have failed IRM. Review the data file for details.

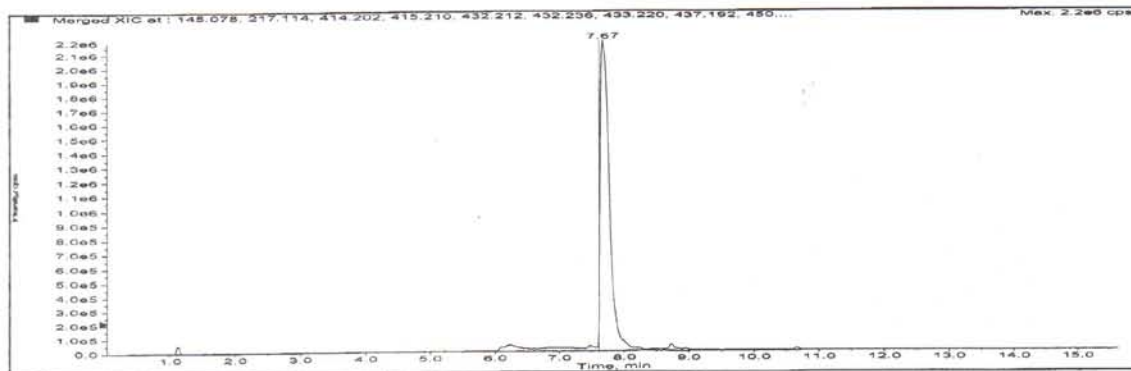

Merged XIC, Period# : 1 Experiment# : 1

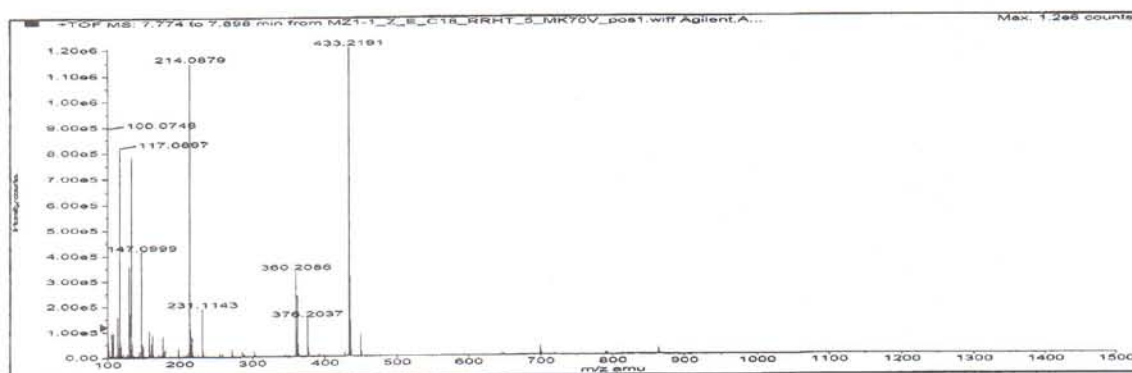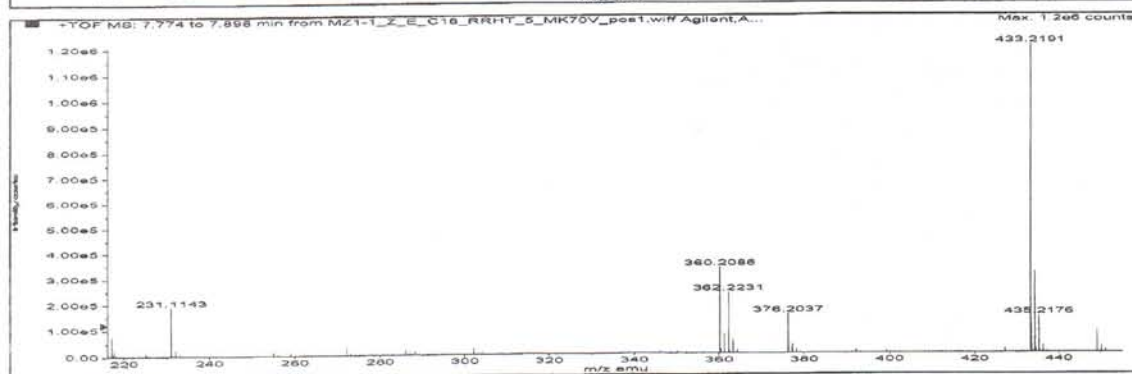

| Formula    | Compound name | Mass      | Peak RT (min) | Peak area  | Description |
|------------|---------------|-----------|---------------|------------|-------------|
| C21H32N6S2 | --            | 432.21298 | 7.67          | 2.05709 E7 | --          |

| Species              | Abundance (counts) | Ion Mass  | Measured Mass | Error (mDa) | Error (ppm) | Ret. Time Error (min) |
|----------------------|--------------------|-----------|---------------|-------------|-------------|-----------------------|
| [M+2H] <sup>2+</sup> | 80952.69           | 217.11377 | 217.11160     | -2.16649    | -9.98       |                       |
| [M+H] <sup>+</sup>   | 1259507.50         | 433.22026 | 433.21908     | -1.17879    | -2.72       |                       |
| [M+NH4] <sup>+</sup> | 24836.46           | 450.24681 | 450.21780     | -29.01626   | -64.45      |                       |

OK, MZ

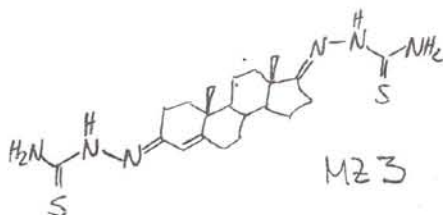

## Compound 4b

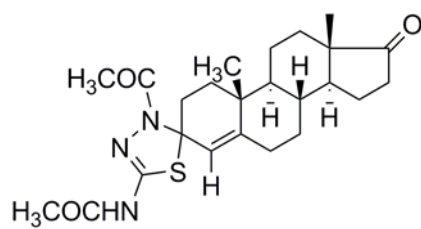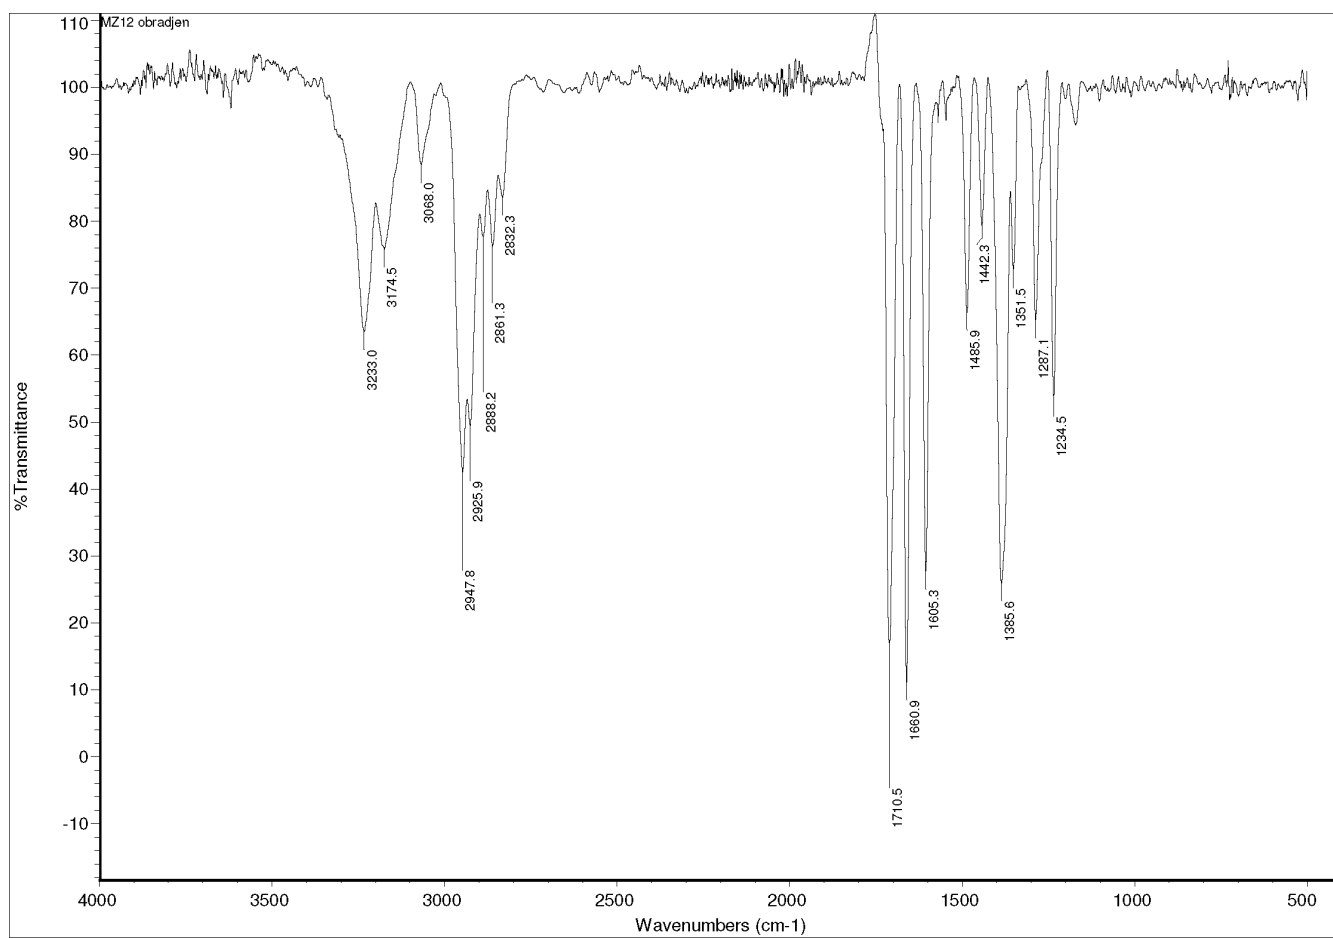

MZ12

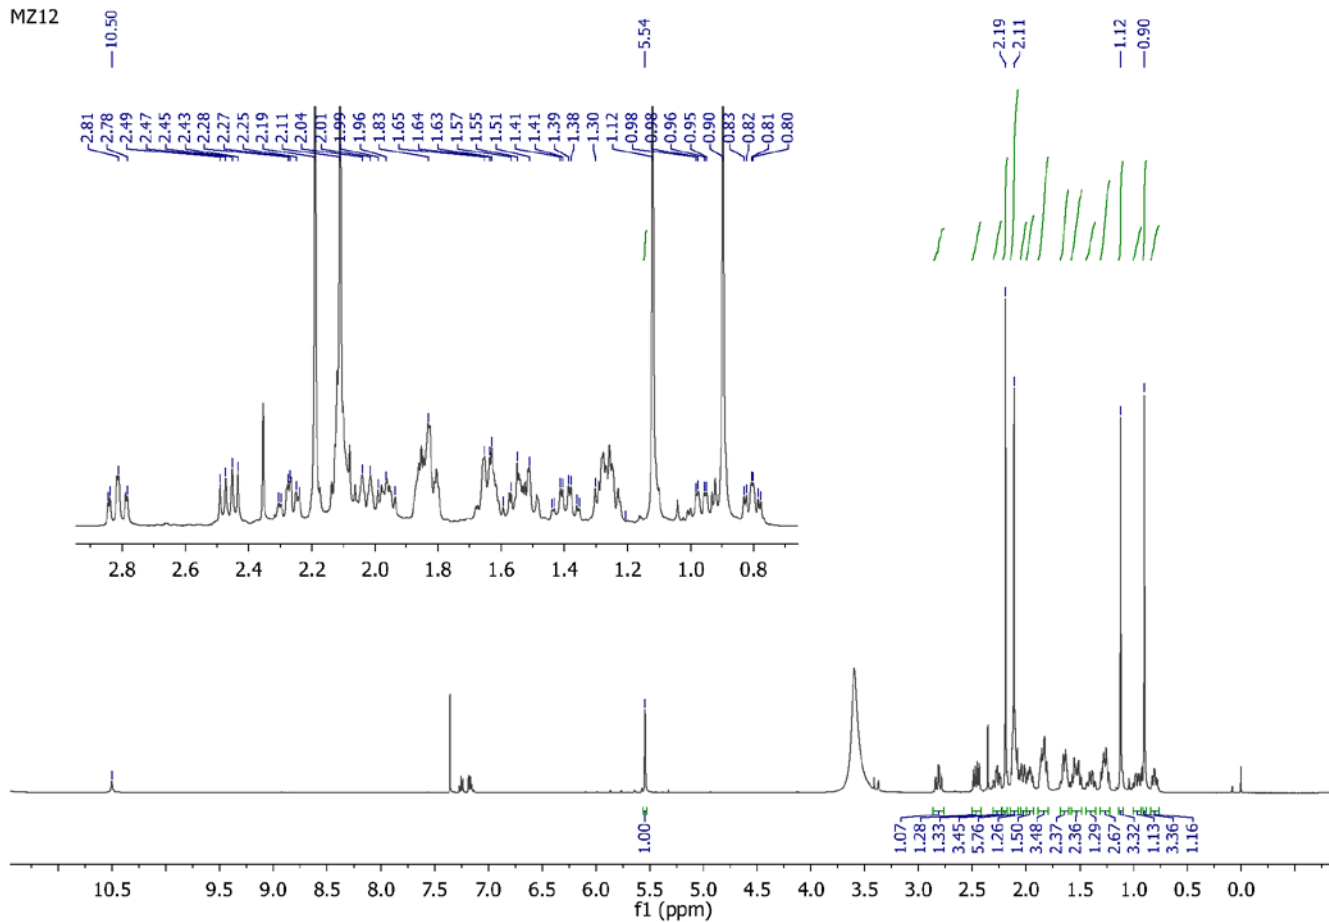

MZ12

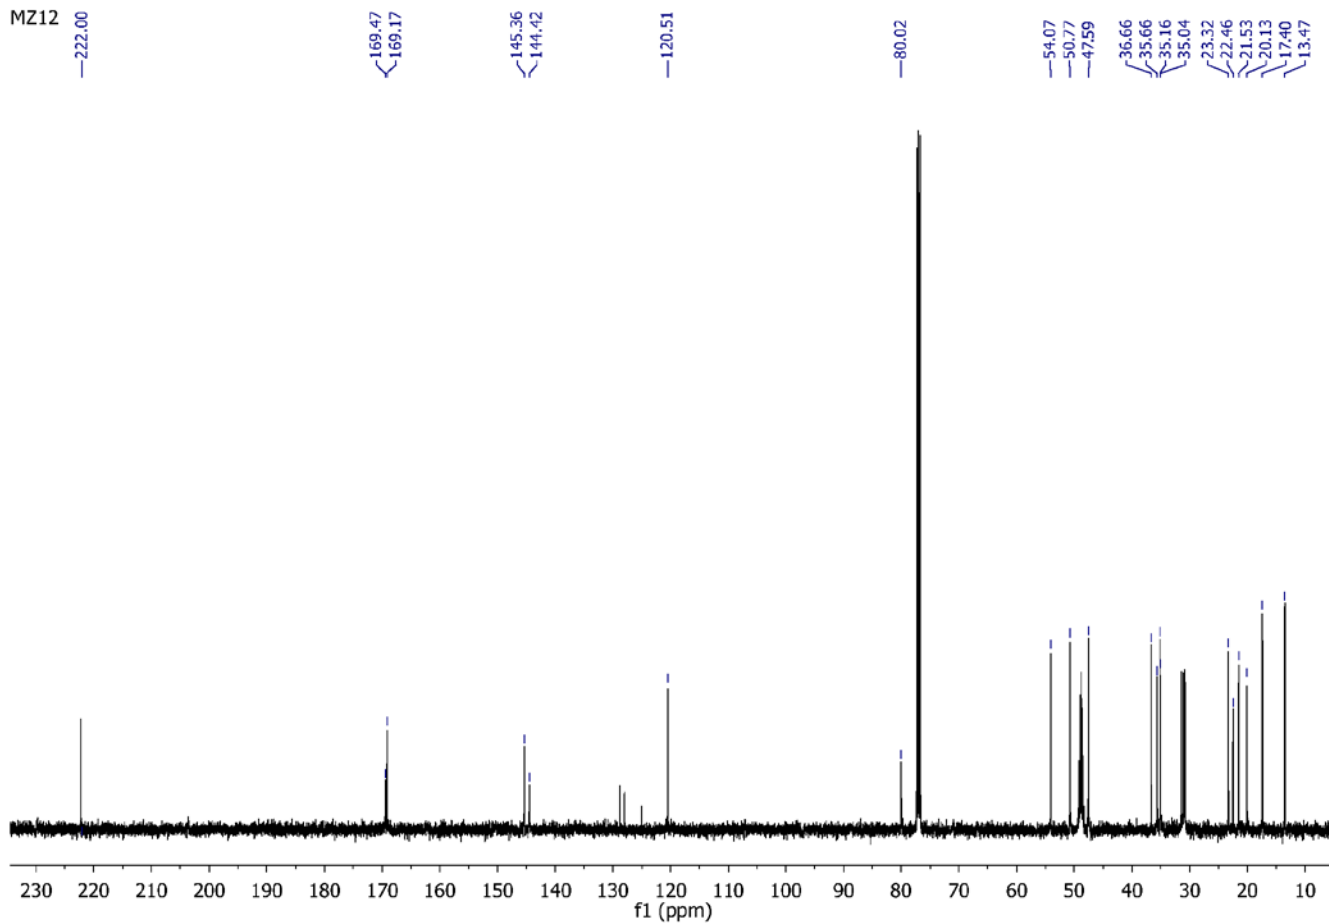

Sample Name: MZ12 Sample Location: P1-C2 Sample Id: Operator: Milka  
 Data File Name: D:\PE Sciex Data\Projects\Sladici\Data\MZ12\_MK70V\_pos1.wiff Acq Time: August 05 2014, 11:17:46 AM  
 Method: d:\TOF\_Data\damethods\Night\_Seq\_Comp\_ident1.anm\efc.xml

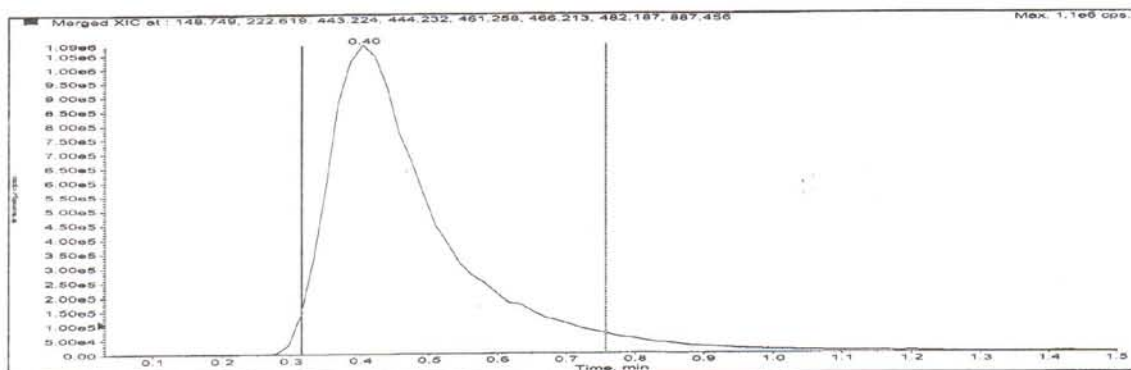

Merged XIC, Period# : 1 Experiment# : 1

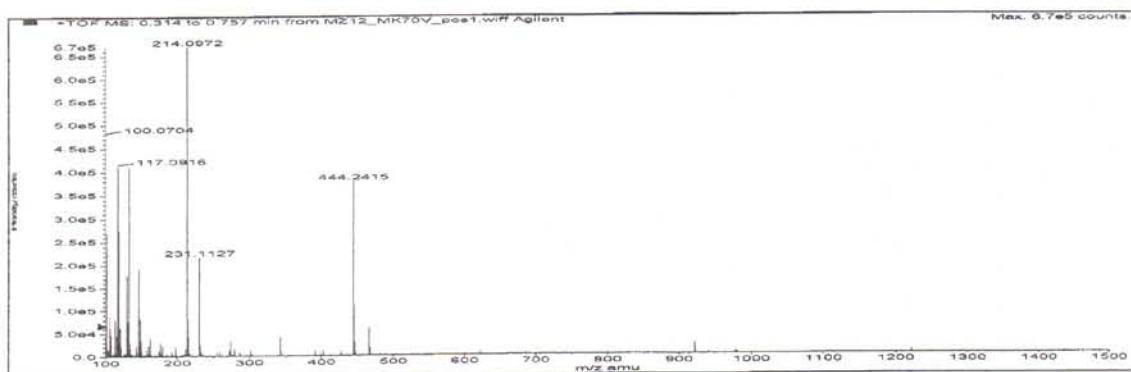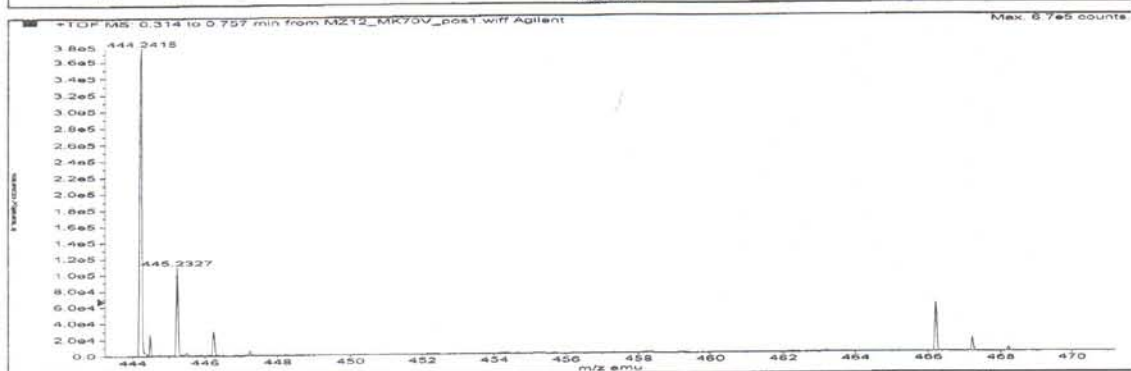

| Formula     | Compound name | Mass      | Peak RT (min) | Peak area  | Description |
|-------------|---------------|-----------|---------------|------------|-------------|
| C24H33N3O3S | --            | 443.22426 | 0.40          | 1.19248 E7 | --          |

| Species             | Abundance (counts) | Ion Mass  | Measured Mass | Error (mDa) | Error (ppm) | Ret. Time Error (min) |
|---------------------|--------------------|-----------|---------------|-------------|-------------|-----------------------|
| [M+H] <sup>+</sup>  | 399940.43          | 444.23154 | 444.23112     | -0.41601    | -0.94       | --                    |
| [M+Na] <sup>+</sup> | 62367.77           | 466.21348 | 466.21310     | -0.38718    | -0.83       | --                    |

## Compound **5b**

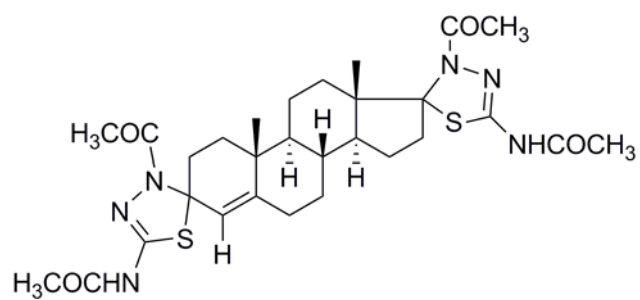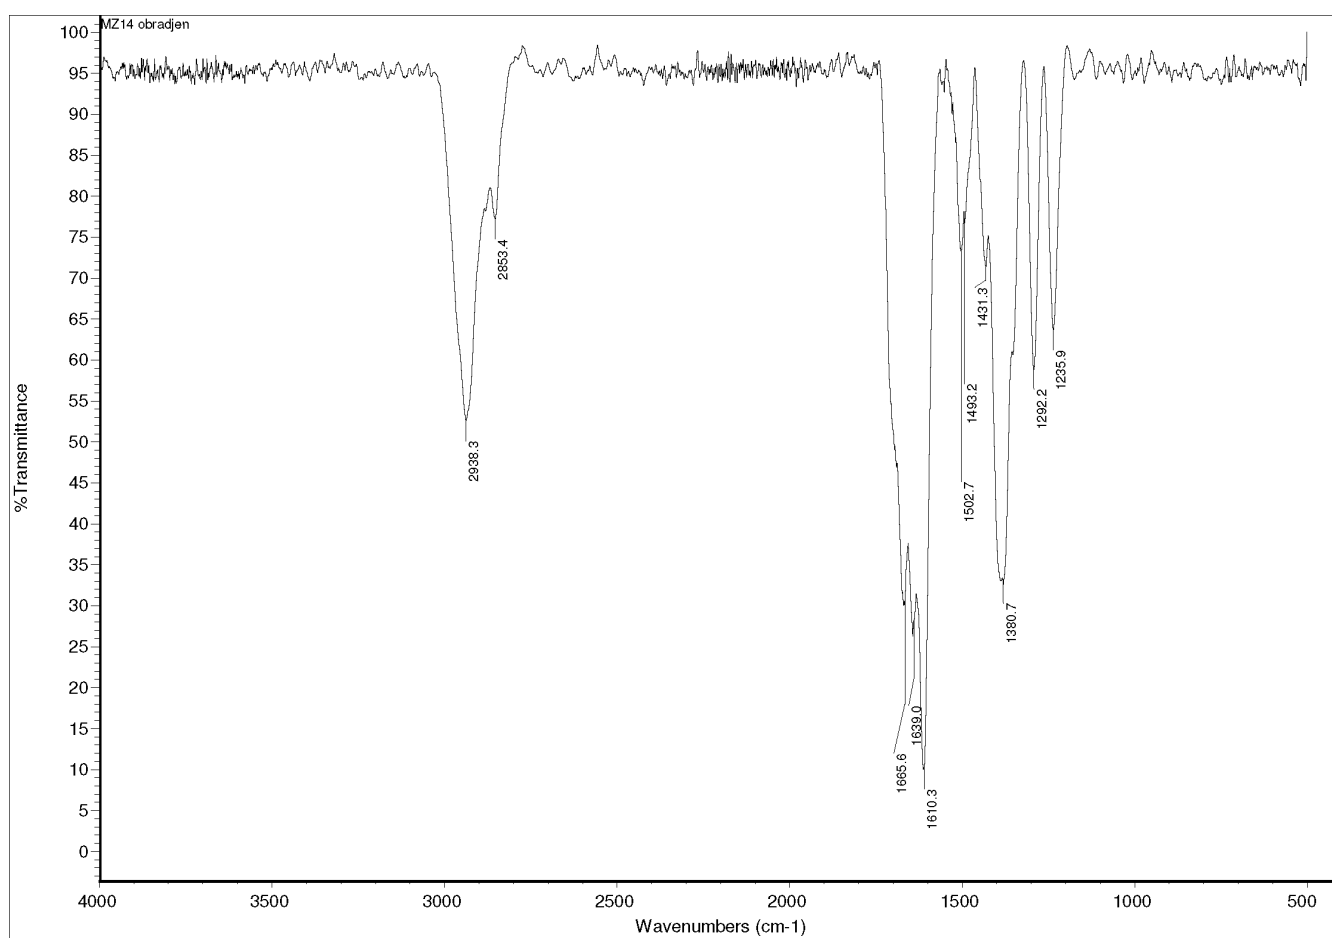

MZ14

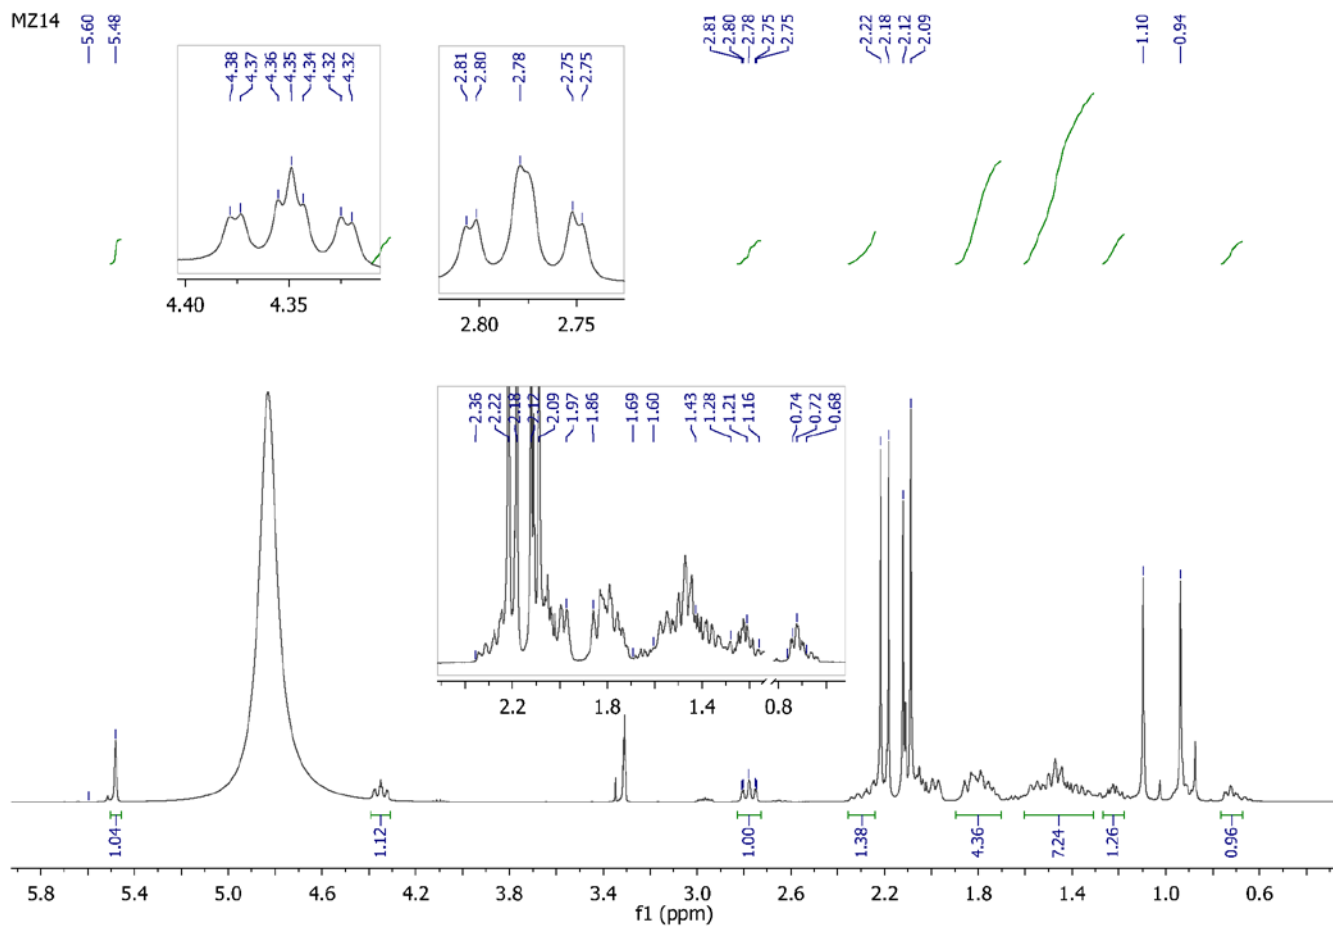

MZ14

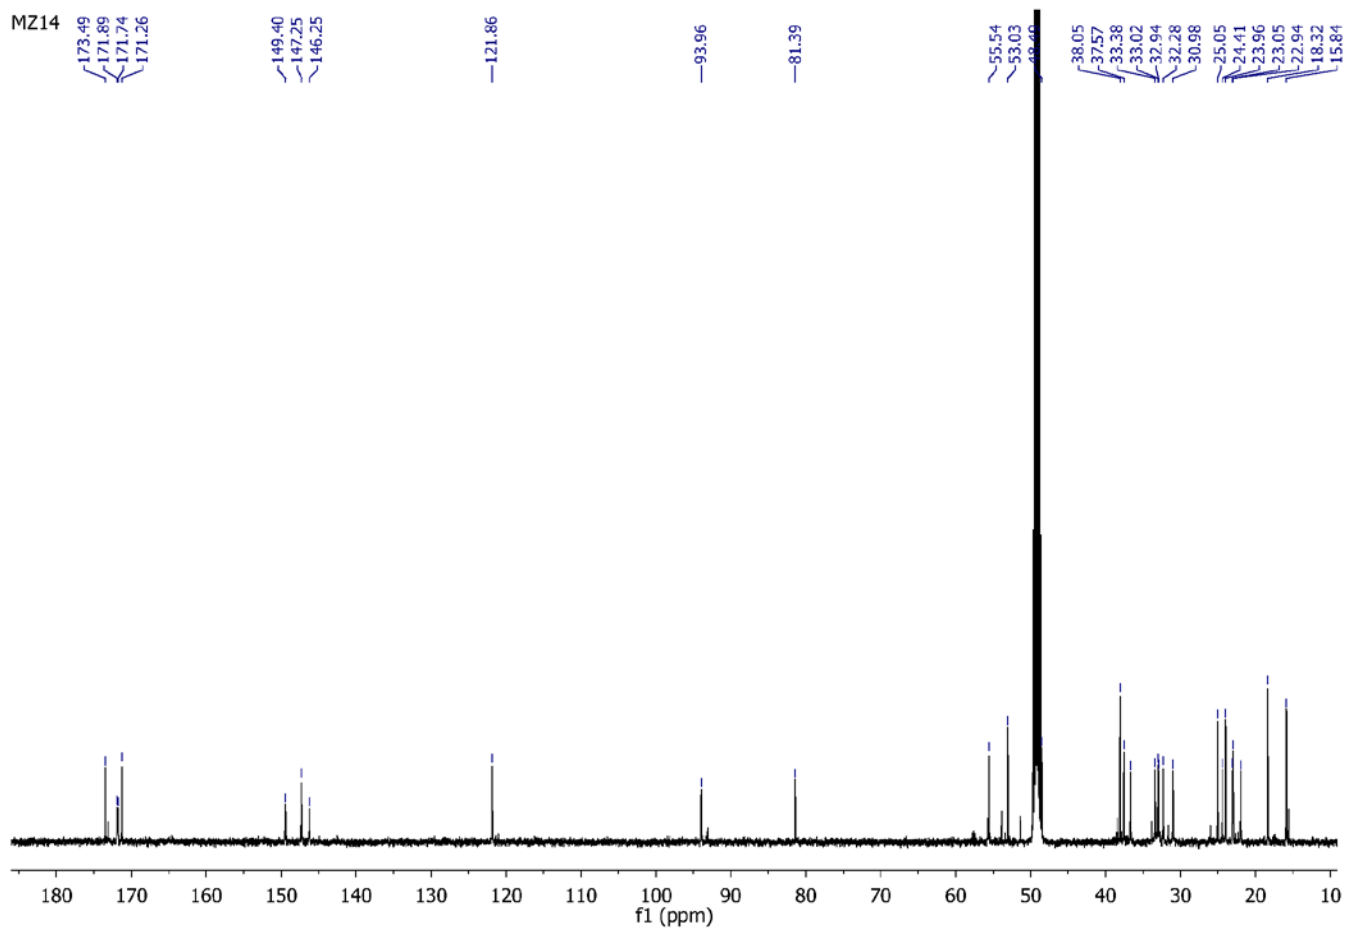

Sample Name: MZ14 Sample Location: P1-C4 Sample Id: Operator: Milka  
 Data File Name: D:\PE Sciex Data\Projects\Sladice\Data\MZ14\_MK70V\_pos1.wiff Acq Time: August 05 2014, 11:22:57 AM  
 Method: d:\TOF\_Data\damethods\Night\_Seq\_Comp\_ident1.anmlefc.xml

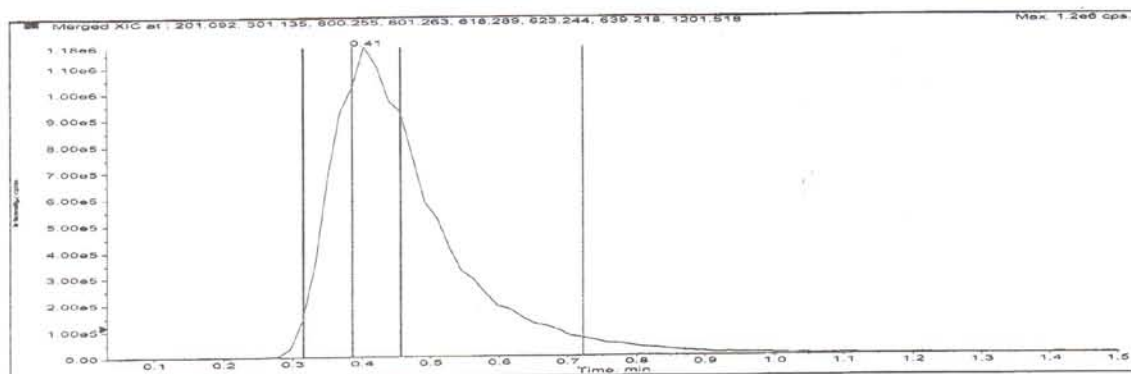

Merged XIC, Period# : 1 Experiment# : 1

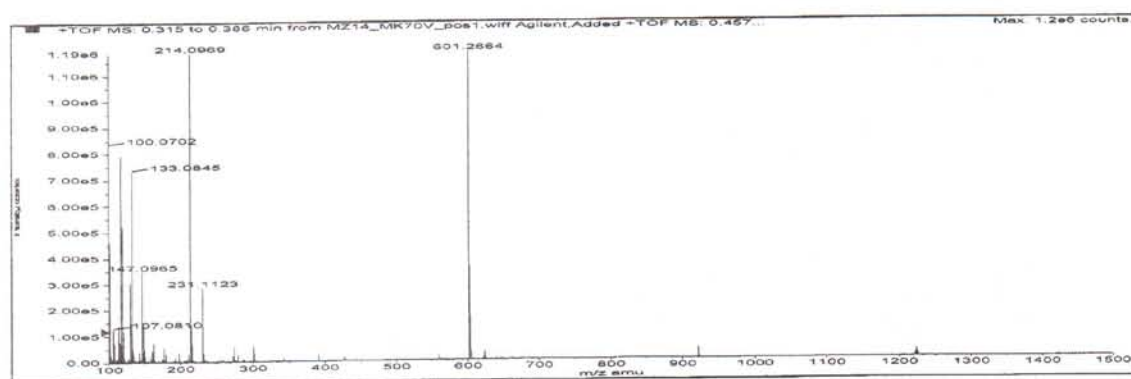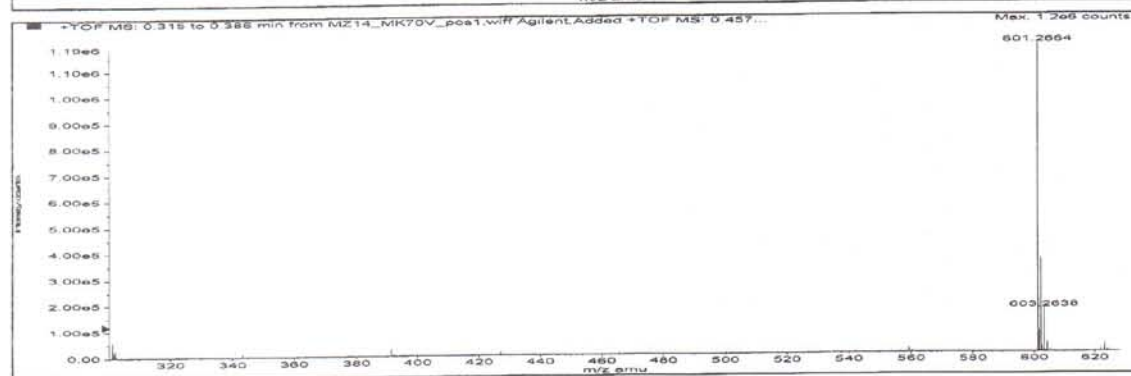

| Formula      | Compound name | Mass      | Peak RT (min) | Peak area  | Description |
|--------------|---------------|-----------|---------------|------------|-------------|
| C29H40N6O4S2 | —             | 600.25525 | 0.41          | 1.23775 E7 | —           |

| Species              | Abundance (counts) | Ion Mass  | Measured Mass | Error (mDa) | Error (ppm) | Ret. Time Error (min) |
|----------------------|--------------------|-----------|---------------|-------------|-------------|-----------------------|
| [M+2H] <sup>2+</sup> | 62126.89           | 301.13490 | 301.13535     | 0.45015     | 1.49        | —                     |
| [M+H] <sup>+</sup>   | 1190849.86         | 601.26252 | 601.26266     | 0.14036     | 0.23        | —                     |
| [M+Na] <sup>+</sup>  | 33383.24           | 623.24447 | 623.24458     | 0.11073     | 0.18        | —                     |

## Compound 2c

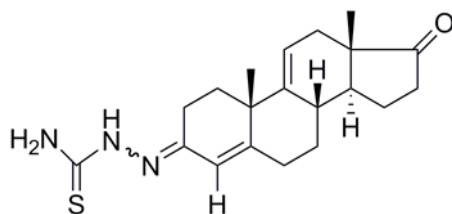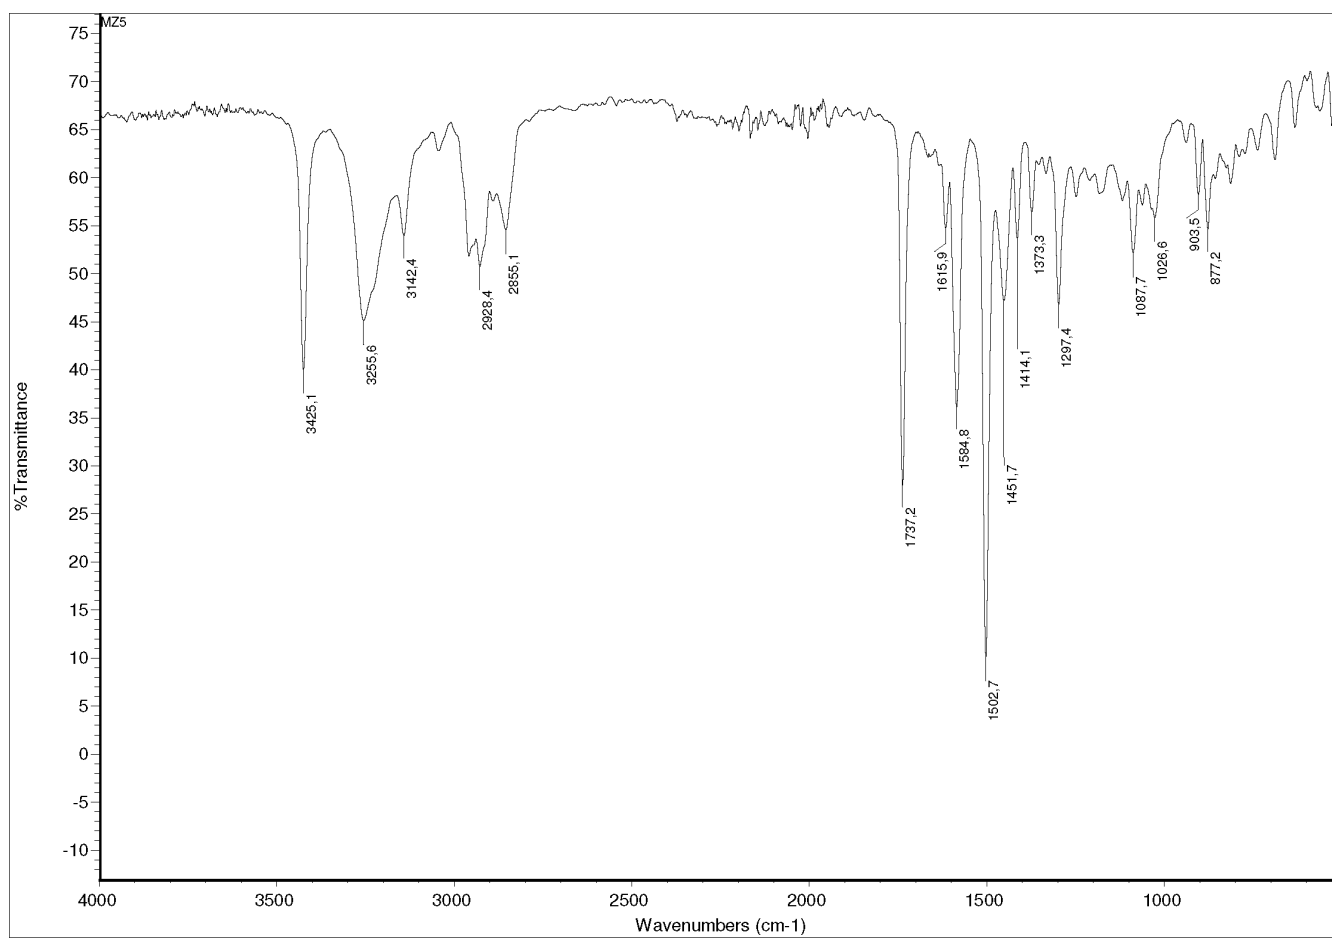

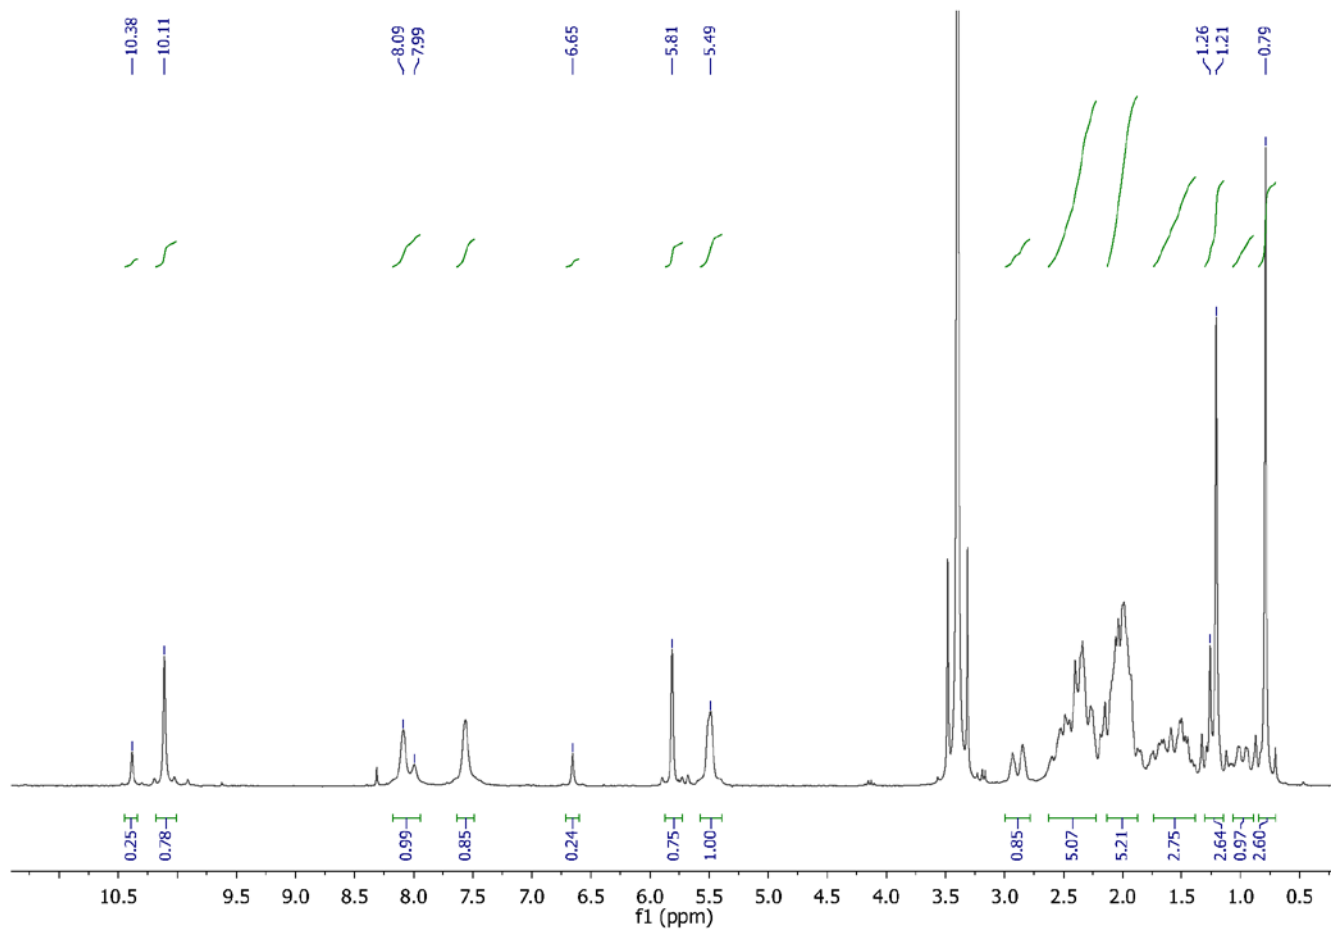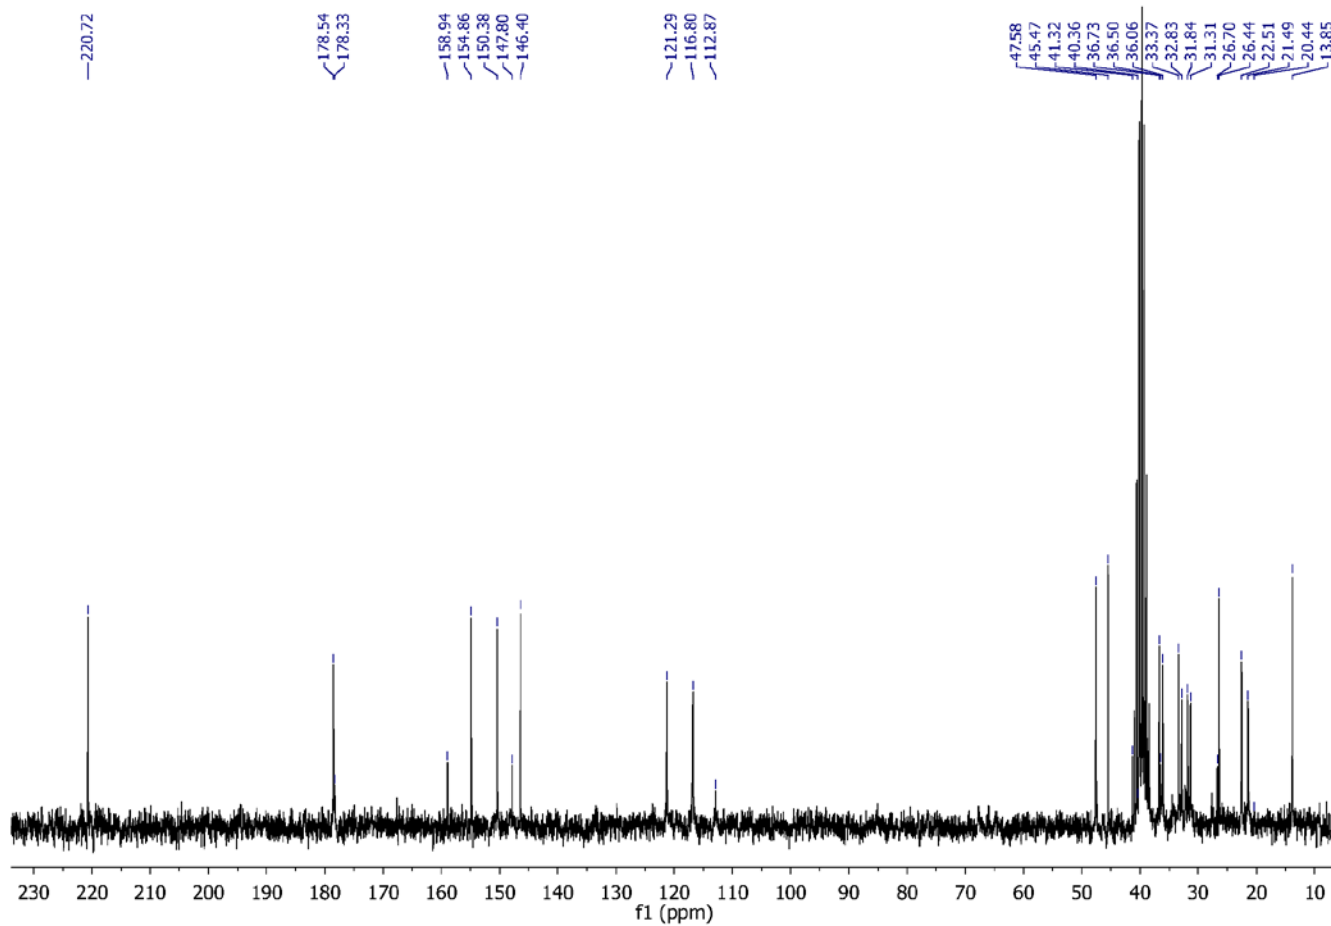

Sample Name: MZ5 Sample Location: P1-C7 Sample Id: Operator: Milka  
 Data File Name: D:\PE Sciex Data\Projects\Sladic\Data\MZ5\_Z\_E\_C18\_RRHT\_5\_MK70V\_pos1.wiff Acq Time: March 24 2014, 02:13:28  
 PM  
 Method: d:\TOF\_Data\amethods\Night\_Seq\_Comp\_Ident1.anml\etc.xml

One or more scans have failed IRM. Review the data file for details.

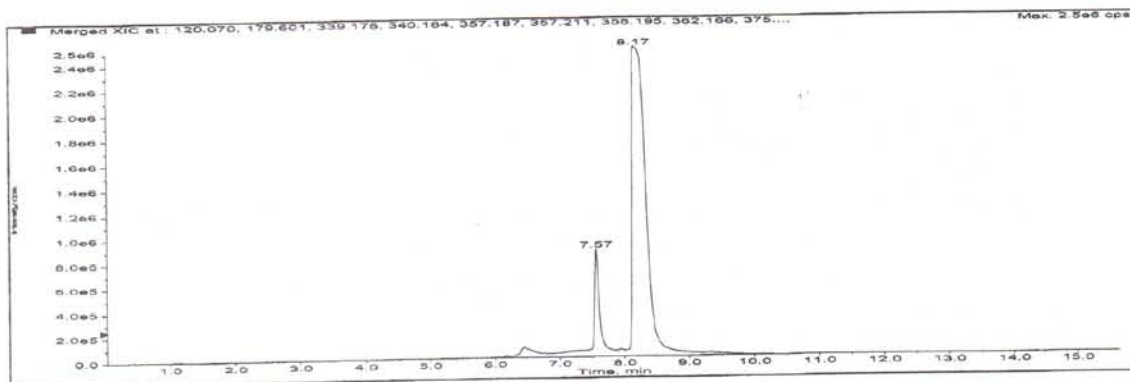

Merged XIC, Period# : 1 Experiment# : 1

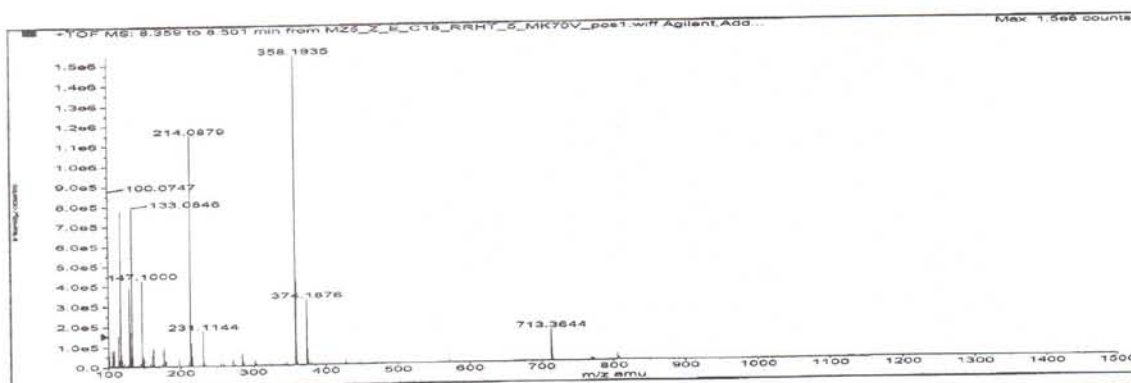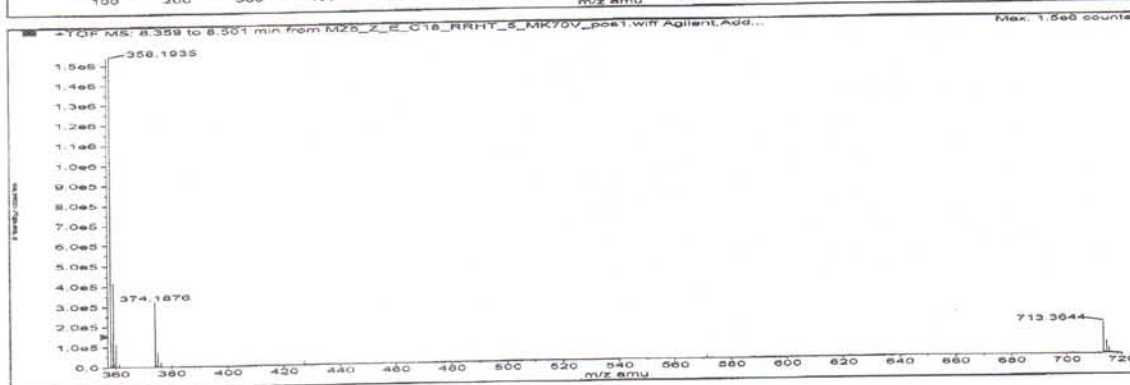

| Formula    | Compound name | Mass      | Peak RT (min) | Peak area  | Description |
|------------|---------------|-----------|---------------|------------|-------------|
| C20H27N3OS | --            | 357.18748 | 8.17          | 3.48884 E7 | --          |

| Species              | Abundance (counts) | Ion Mass  | Measured Mass | Error (mDa) | Error (ppm) | Ret. Time Error (min) |
|----------------------|--------------------|-----------|---------------|-------------|-------------|-----------------------|
| [M+H] <sup>+</sup>   | 1606346.42         | 358.19476 | 358.19350     | -1.25947    | -3.52       | --                    |
| [M+NH4] <sup>+</sup> | 75377.06           | 375.22131 | 375.19111     | -30.19601   | -80.48      | --                    |
| [2M+H] <sup>+</sup>  | 29439.09           | 715.38224 | 715.36655     | -15.69705   | -21.94      | --                    |

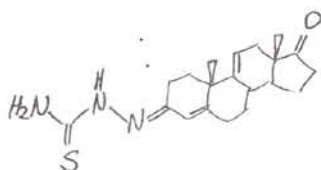

# Compound 3c

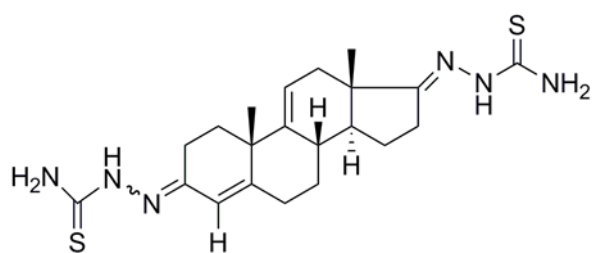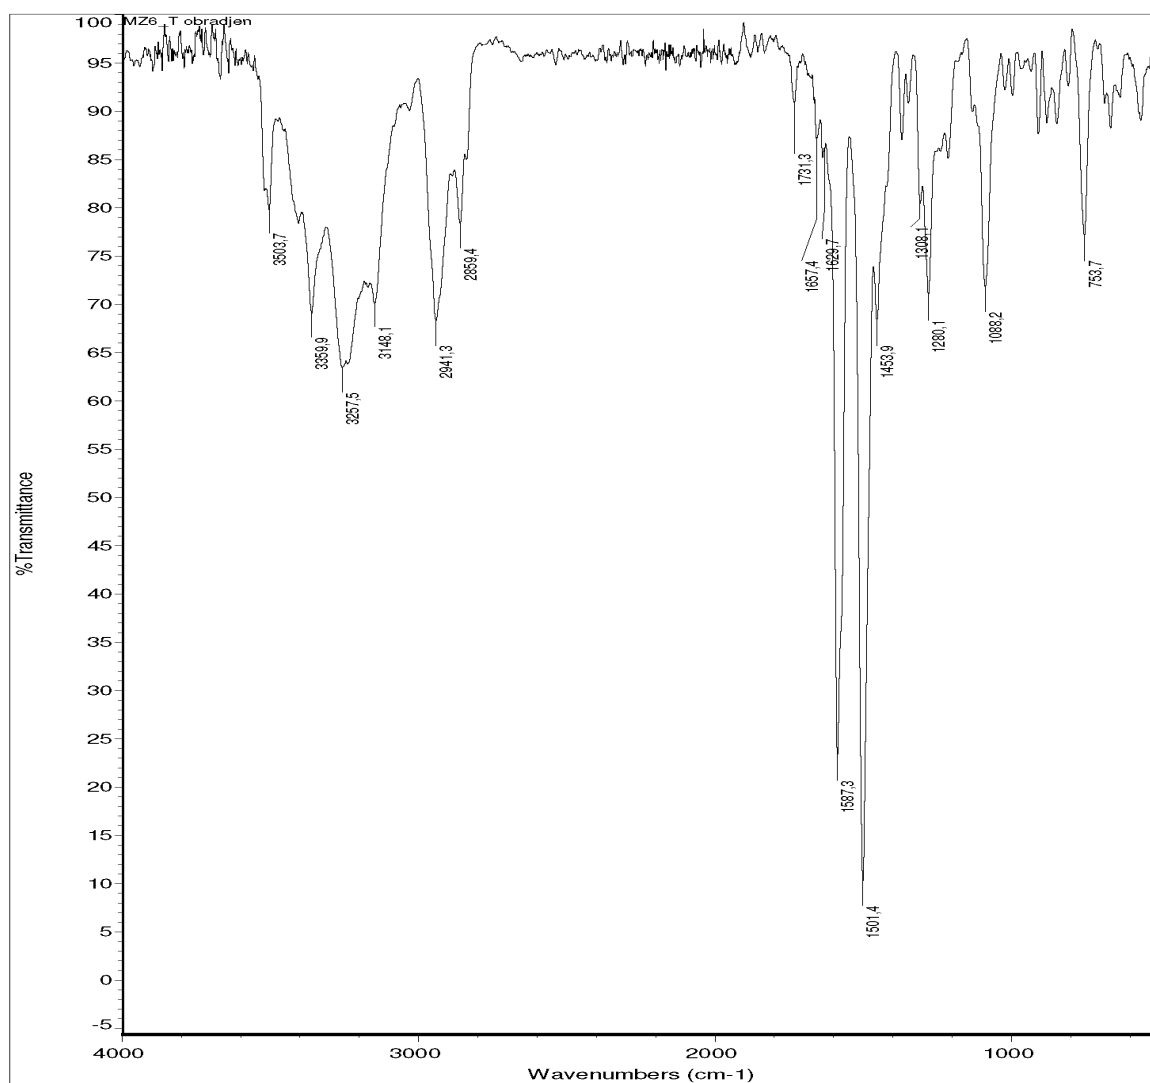

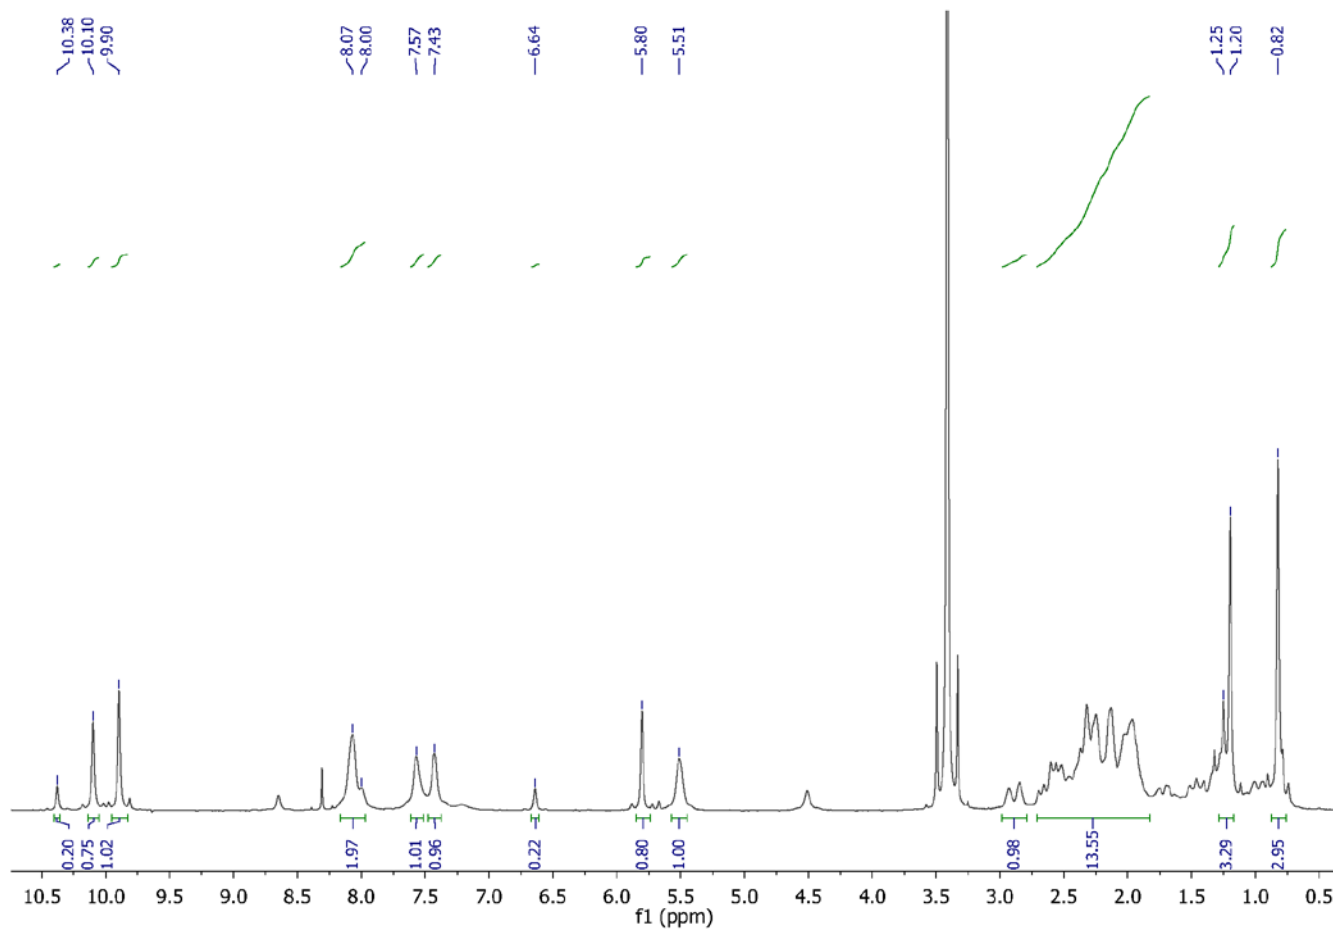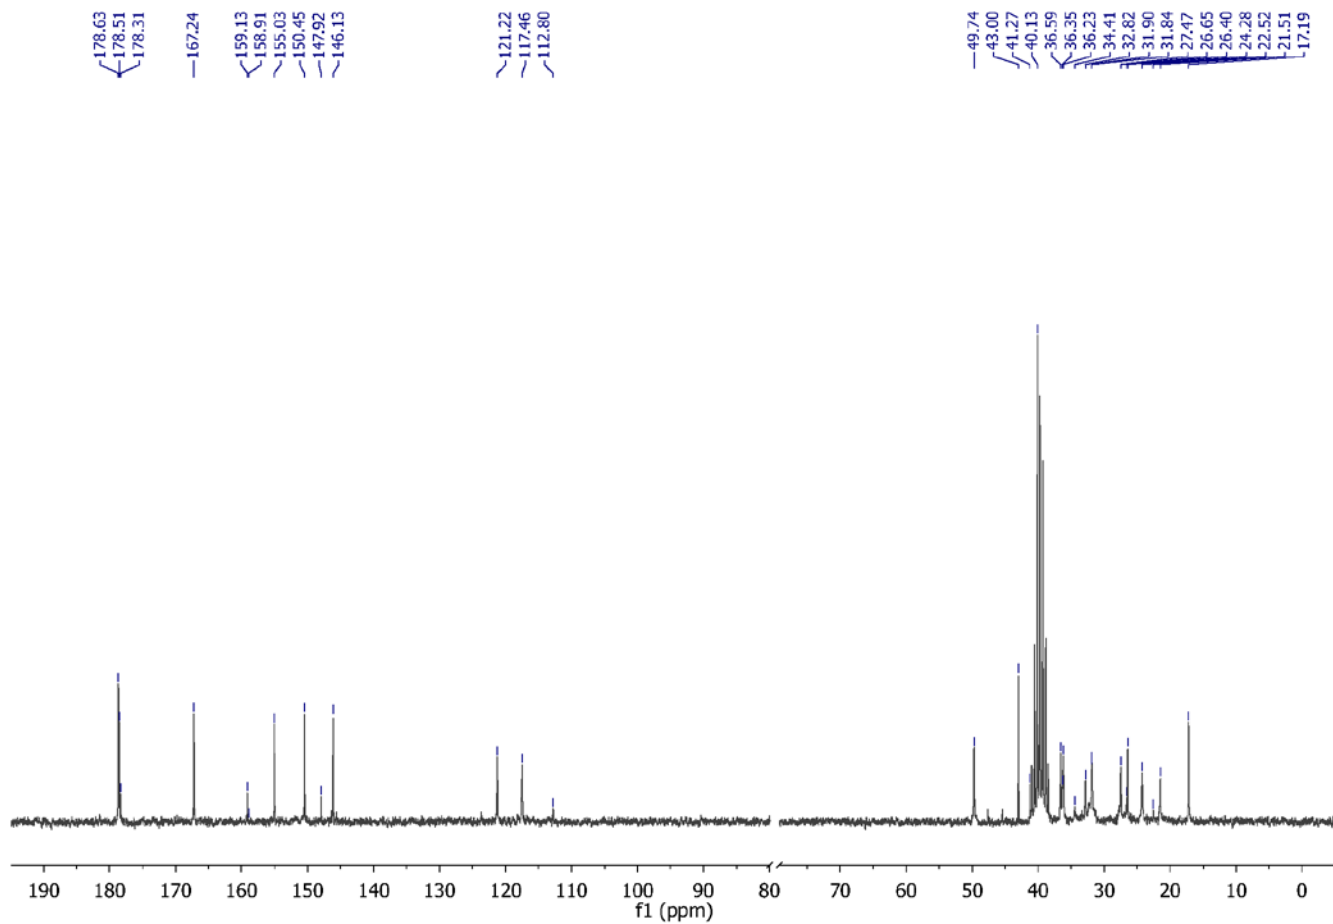

Sample Name: MZ6 Sample Location: P1-C9 Sample Id: Operator: Milka  
 Data File Name: D:\PE Sciex Data\Projects\StadiciData\MZ6\_Z-E\_C18-RRHT\_5\_MK70V\_pos1.wiff Acq Time: March 24, 2014, 02:55:59 PM  
 Method: d:\TOF\_Data\damethods\Night\_Seq\_Comp\_ident1.anmlc.xml

One or more scans have failed IRM. Review the data file for details.

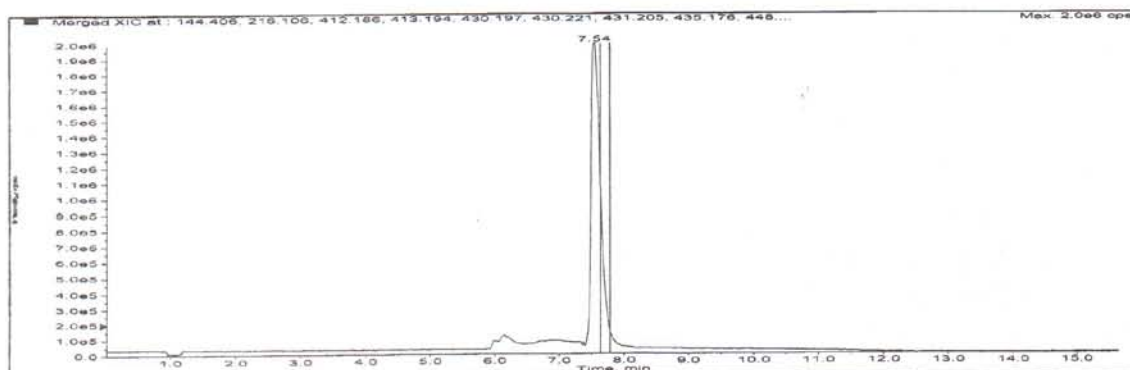

Merged XIC, Period# : 1 Experiment# : 1

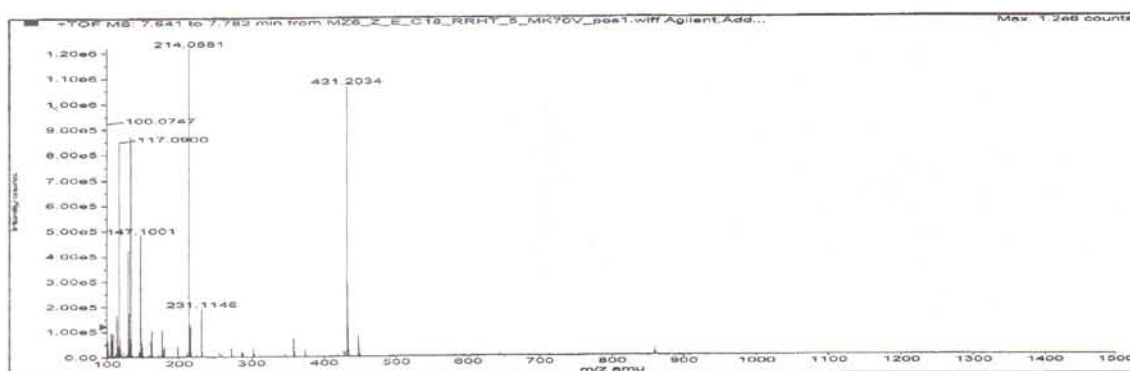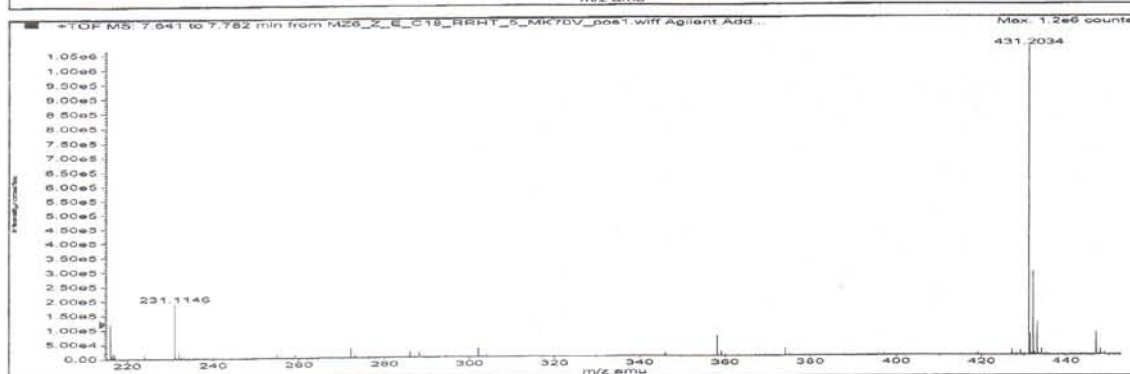

| Formula    | Compound name | Mass      | Peak RT (min) | Peak area  | Description |
|------------|---------------|-----------|---------------|------------|-------------|
| C21H30N6S2 | —             | 430.19734 | 7.54          | 1.96986 E7 | —           |

| Species              | Abundance (counts) | Ion Mass  | Measured Mass | Error (mDa) | Error (ppm) | Ret. Time Error (min) |
|----------------------|--------------------|-----------|---------------|-------------|-------------|-----------------------|
| [M+2H] <sup>2+</sup> | 120512.45          | 216.10594 | 216.09697     | -8.97379    | -41.53      |                       |
| [M+H] <sup>+</sup>   | 1105903.79         | 431.20461 | 431.20339     | -1.22762    | -2.85       |                       |
| [M+NH4] <sup>+</sup> | 22141.87           | 448.23116 | 448.20094     | -30.22452   | -67.44      |                       |

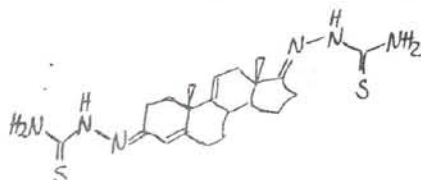

## Compound 4c

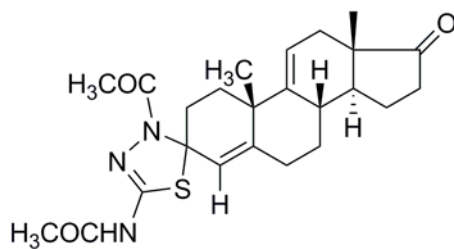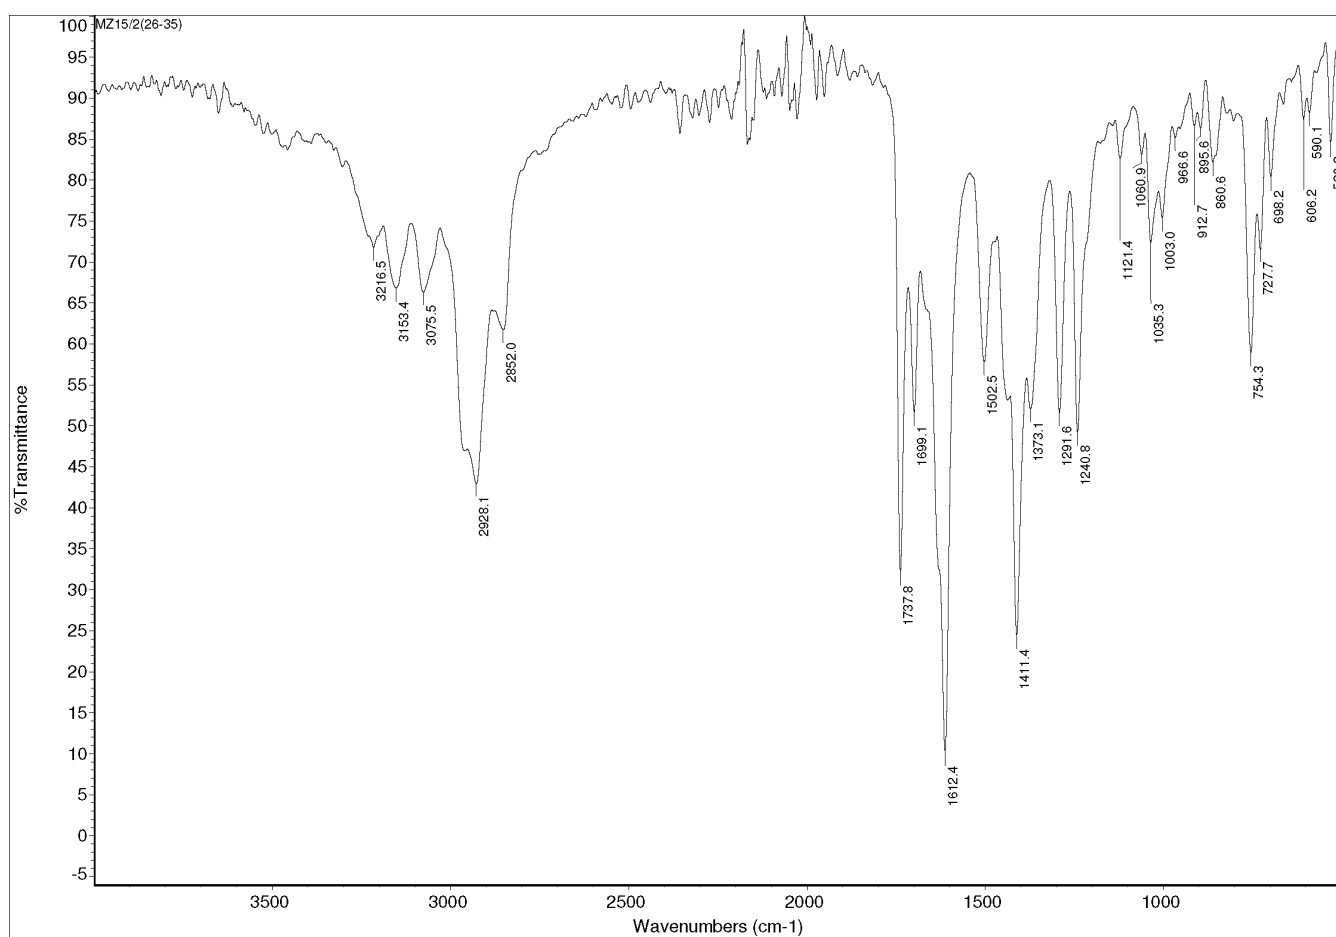

Desktop 11.7.15

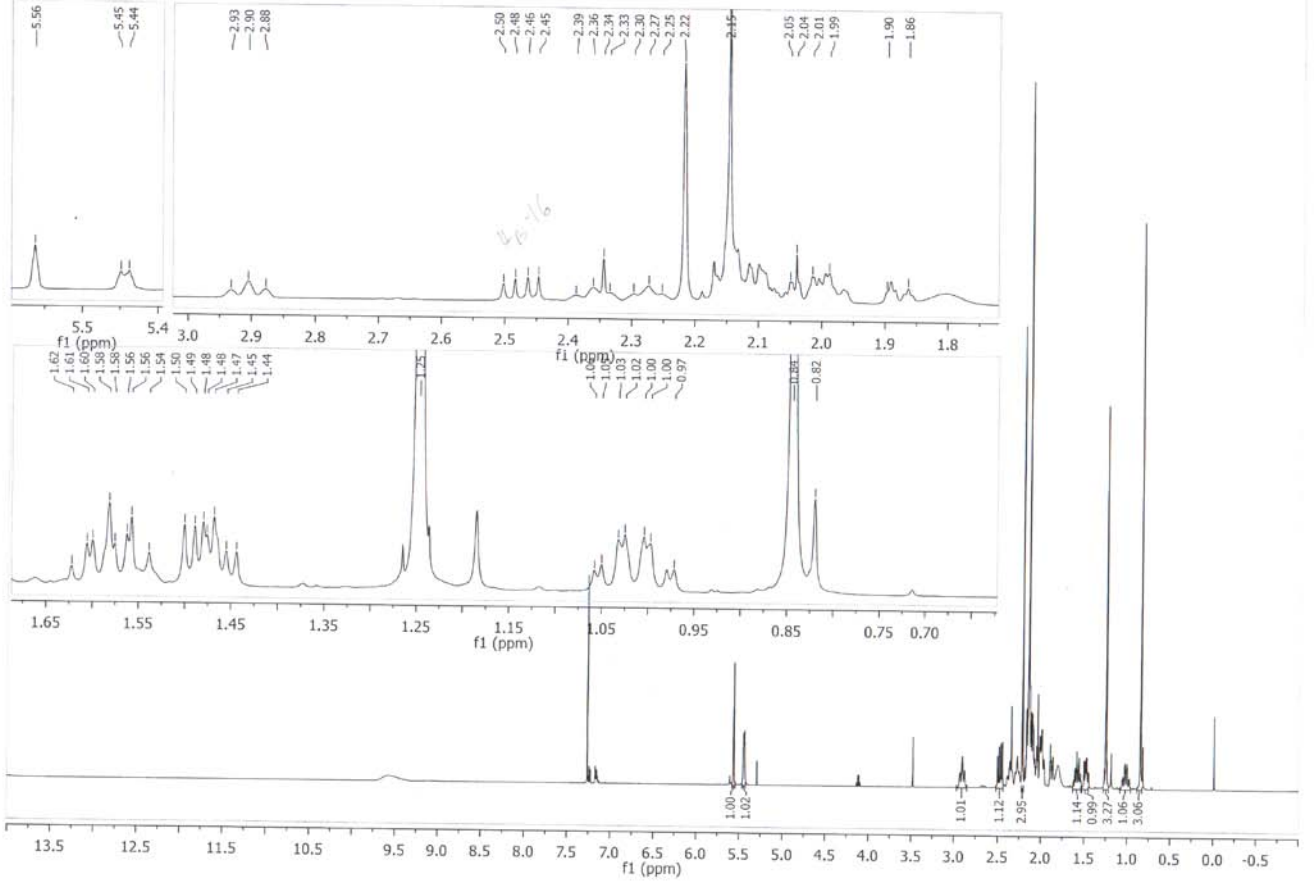

MZ 15

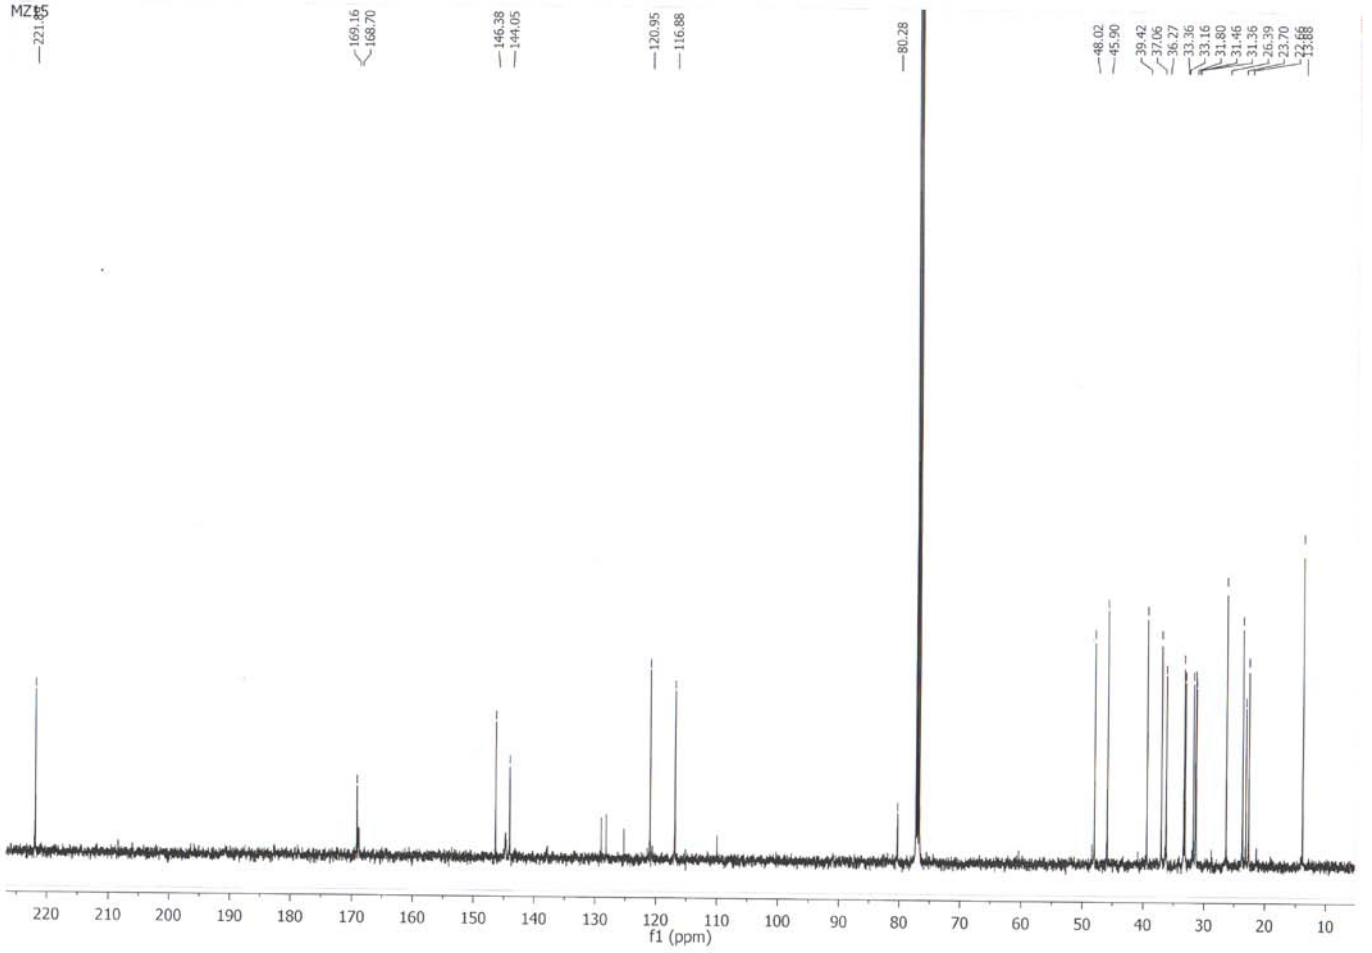

Sample Name: MZ15 Sample Location: P1-C5 Sample Id: Operator: Milka  
 Data File Name: D:\PE Sciex Data\Projects\Sladic\Data\MZ15\_MK70V\_pos1.wiff Acq Time: August 05 2014, 11:25:25 AM  
 Method: d:\TOF\_Data\damethods\Night\_Seq\_Comp\_Ident1.anml\efc.xml

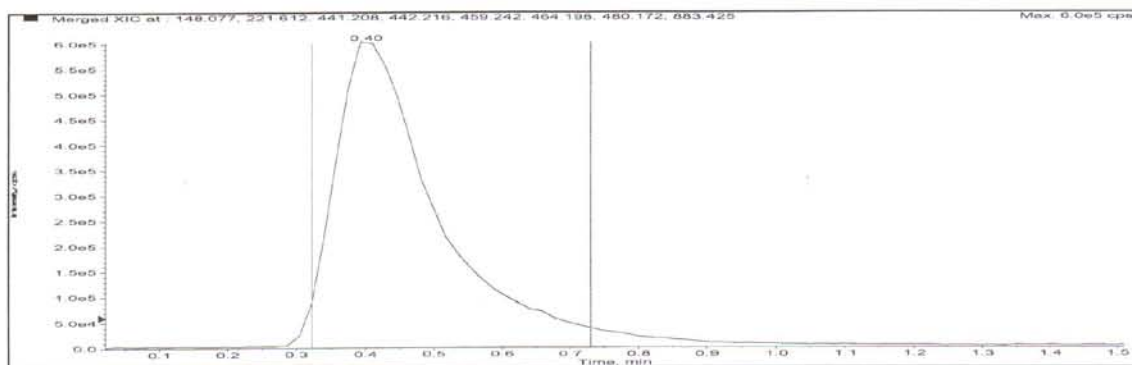

Merged XIC, Period# : 1 Experiment# : 1

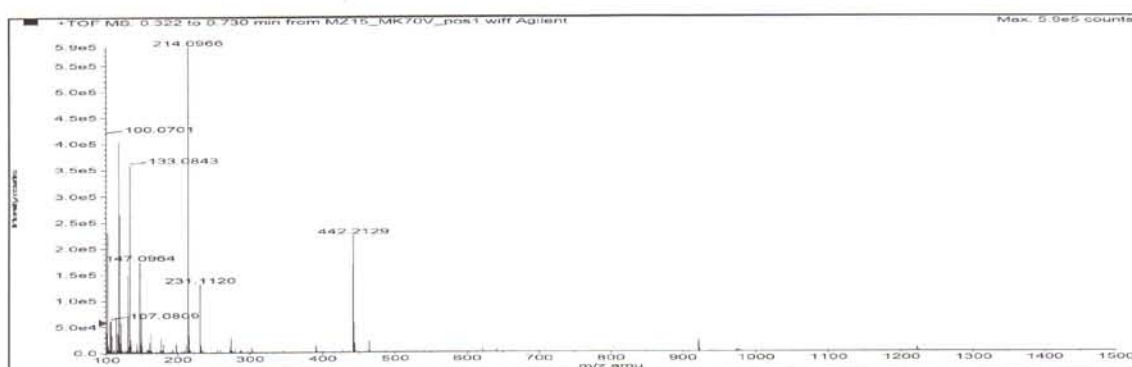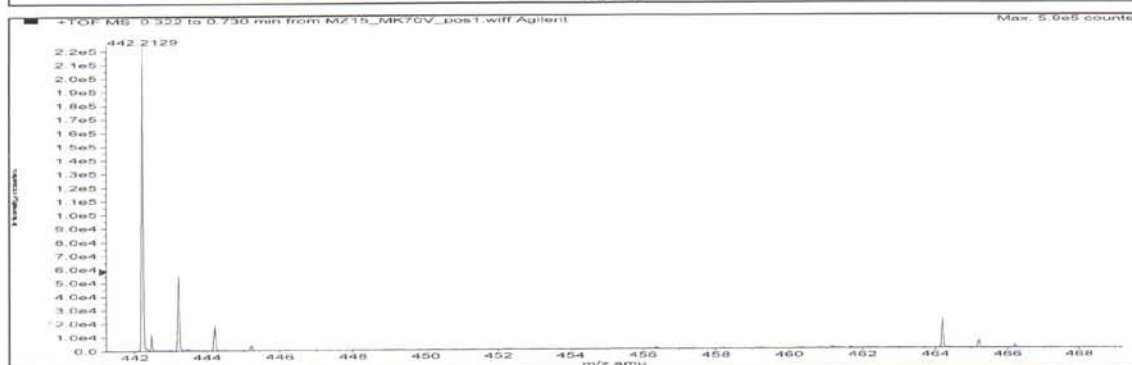

| Formula     | Compound name | Mass      | Peak RT (min) | Peak area  | Description |
|-------------|---------------|-----------|---------------|------------|-------------|
| C24H31N3O3S | --            | 441.20861 | 0.40          | 6.26847 E6 | --          |

| Species             | Abundance (counts) | Ion Mass  | Measured Mass | Error (mDa) | Error (ppm) | Ret. Time Error (min) |
|---------------------|--------------------|-----------|---------------|-------------|-------------|-----------------------|
| [M+H] <sup>+</sup>  | 224776.54          | 442.21589 | 442.21584     | -0.04842    | -0.11       | --                    |
| [M+Na] <sup>+</sup> | 21273.69           | 464.19783 | 464.19803     | 0.19545     | 0.42        | --                    |

## Compound 5c

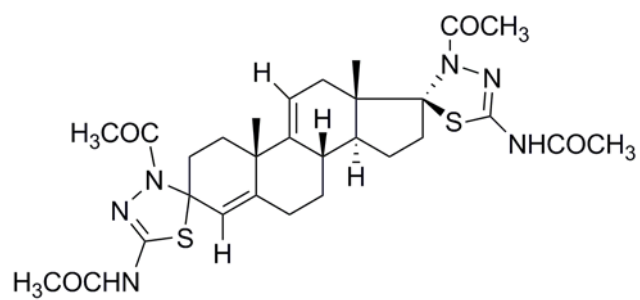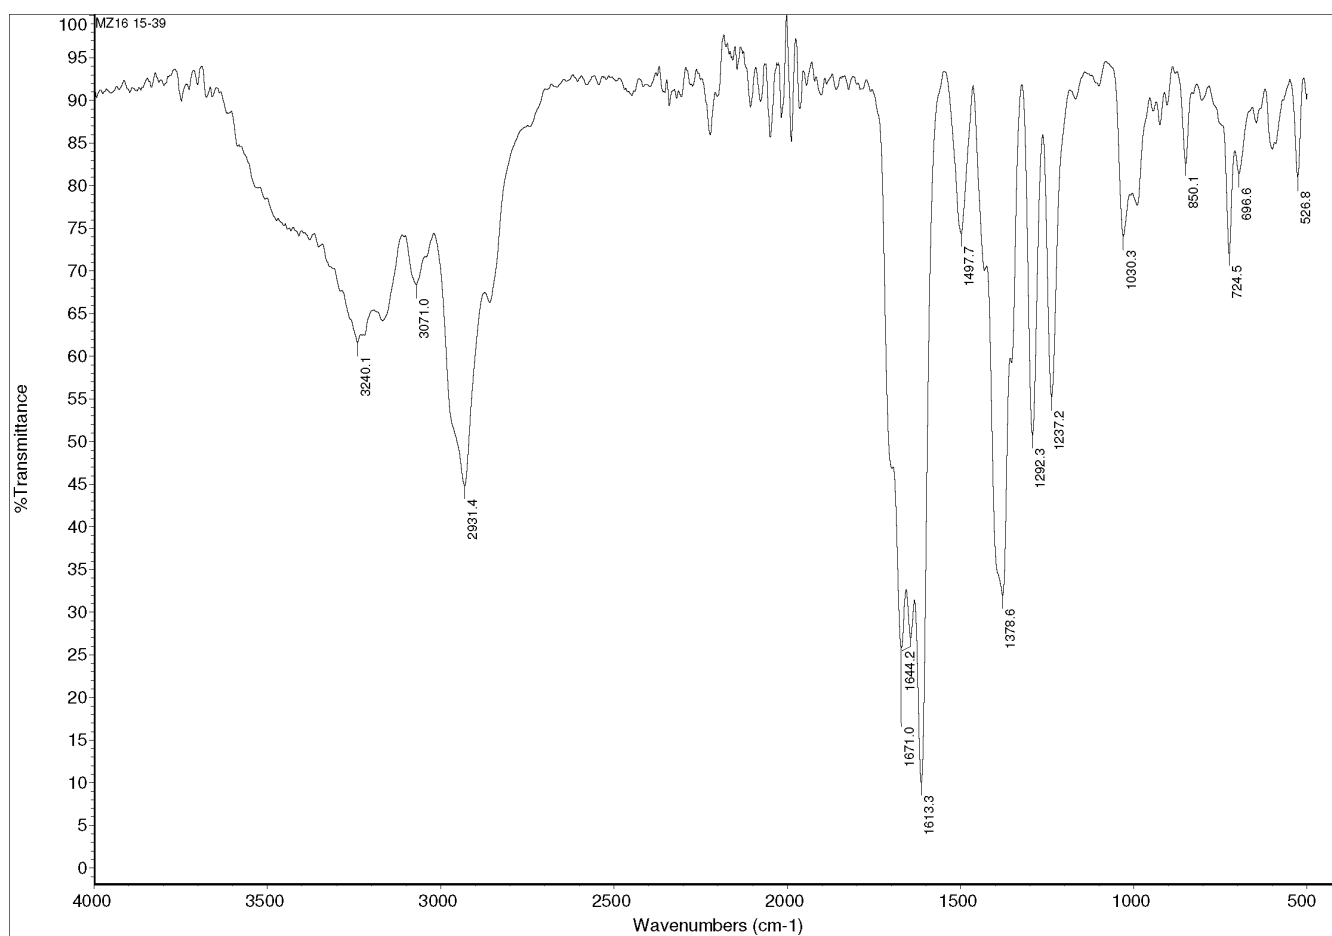

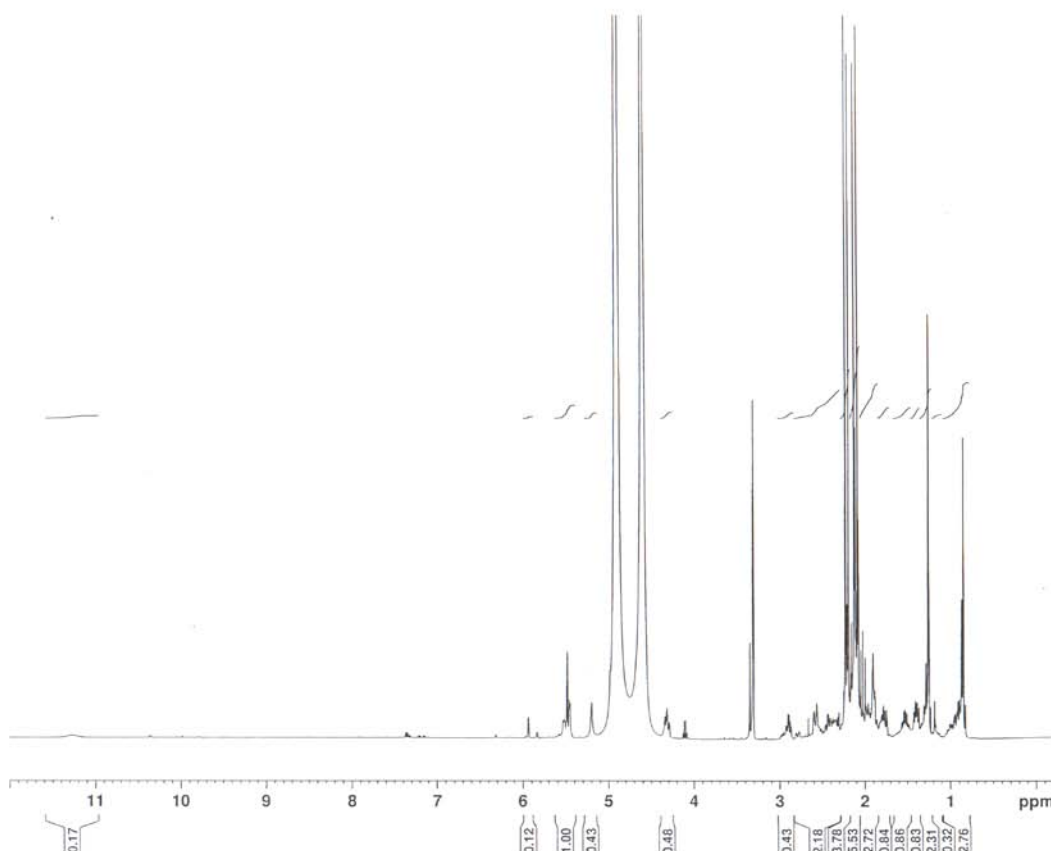

Current Data Parameters  
NAME MZ16  
EXPNO 1  
PROCNO 1

F2 - Acquisition Parameters  
Date\_ 20140624  
Time 15.19  
INSTRUM spect  
PROBHD 5 mm BBO BB-1H  
PULPROG zg30  
TD 32768  
SOLVENT MeOD  
NS 32  
DS 0  
SWH 6510.417 Hz  
FIDRES 0.198682 Hz  
AQ 2.5165825 sec  
RG 40.3  
DW 76.800 usec  
DE 6.50 usec  
TE 298.0 K  
D1 2.00000000 sec  
TD0 1

\*\*\*\*\* CHANNEL f1 \*\*\*\*\*  
SFO1 500.2630115 MHz  
NUC1 1H  
P1 9.35 usec  
PLW1 27.37999916 W

F2 - Processing parameters  
SI 32768  
SF 500.2600090 MHz  
WDW EM  
SSB 0  
LB 0.20 Hz  
GB 0  
FC 1.00

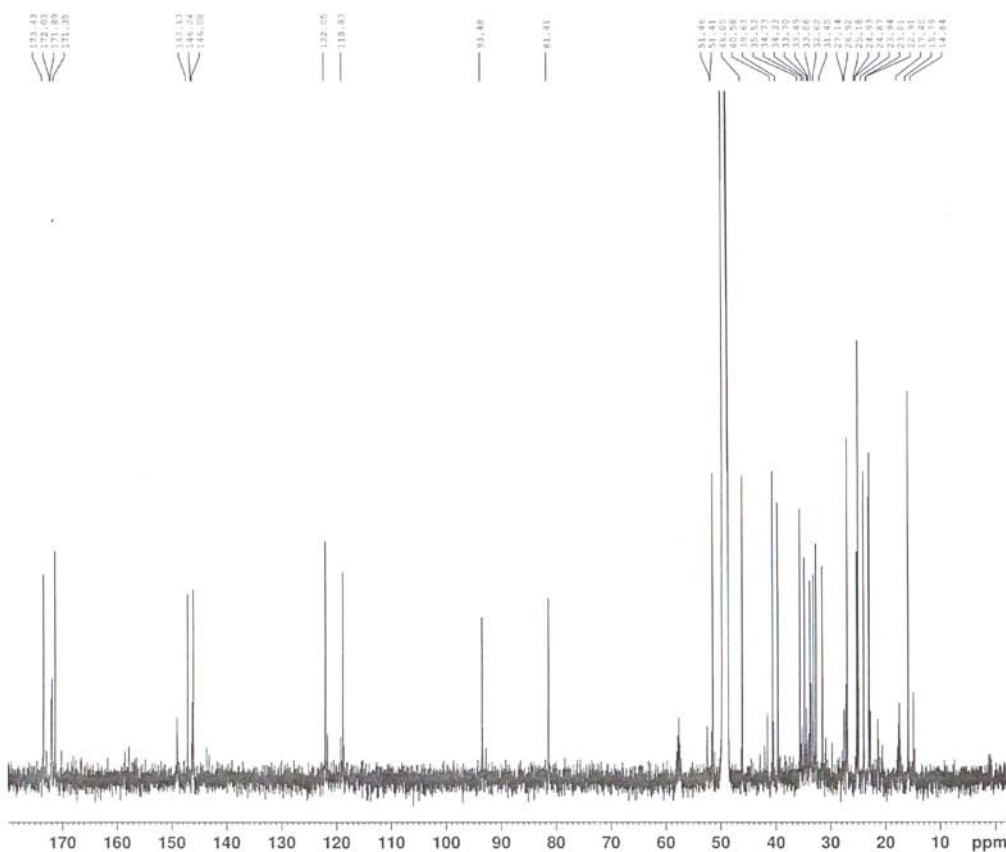

Current Data Parameters  
NAME MZ16  
EXPNO 6  
PROCNO 1

F2 - Acquisition Parameters  
Date\_ 20140625  
Time 7.59  
INSTRUM spect  
PROBHD 5 mm BBO BB-1H  
PULPROG zgpg30  
TD 32768  
SOLVENT MeOD  
NS 3267  
DS 4  
SWH 32894.738 Hz  
FIDRES 1.003868 Hz  
AQ 0.4980736 sec  
RG 1030  
DW 15.200 usec  
DE 6.50 usec  
TE 298.0 K  
D1 2.00000000 sec  
D11 0.03000000 sec  
TD0 1

\*\*\*\*\* CHANNEL f1 \*\*\*\*\*  
SFO1 125.8055719 MHz  
NUC1 13C  
P1 11.50 usec  
PLW1 32.22800064 W

\*\*\*\*\* CHANNEL f2 \*\*\*\*\*  
SFO2 500.2630116 MHz  
NUC2 1H  
PCPDPRG12 waitz16  
PCPD2 80.00 usec  
PLW2 20.77000004 W  
PLW12 0.19267001 W  
PLW13 0.25130999 W

F2 - Processing parameters  
SI 32768  
SF 125.7902882 MHz  
WDW EM  
SSB 0  
LB 1.50 Hz  
GB 0  
FC 1.40

Sample Name: MZ16 Sample Location: P1-C6 Sample Id: Operator: Milka  
 Data File Name: D:\PE Sciex Data\Projects\Sladic\Data\MZ16\_MK70V\_pos1.wiff Acq Time: August 05 2014, 11:27:55 AM  
 Method: d:\TOF\_Data\damethods\Night\_Seq\_Comp\_ident1.anml\efc.xml

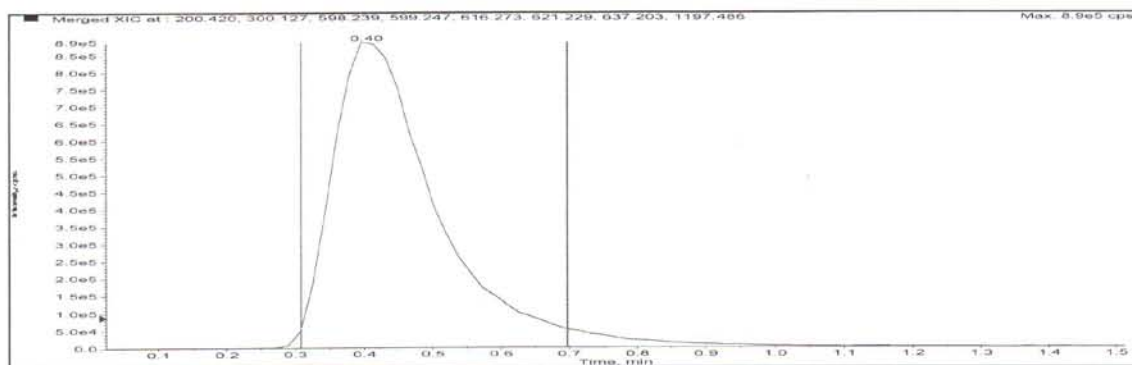

Merged XIC, Period# : 1 Experiment# : 1

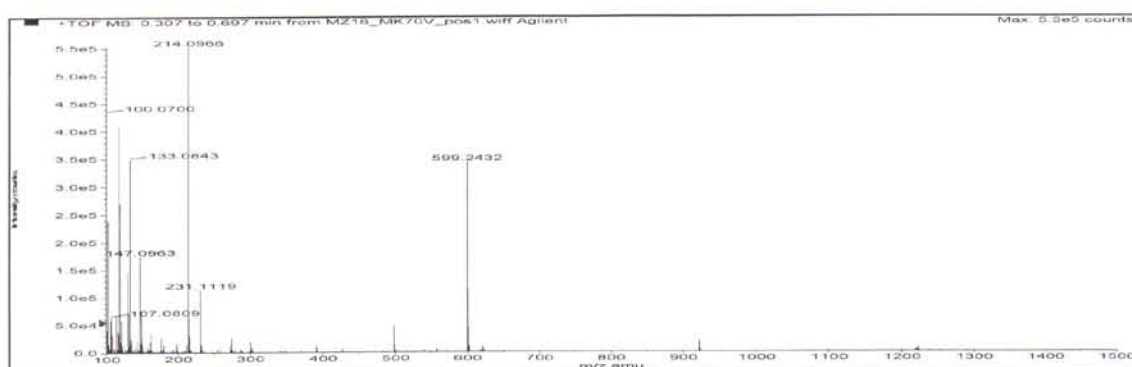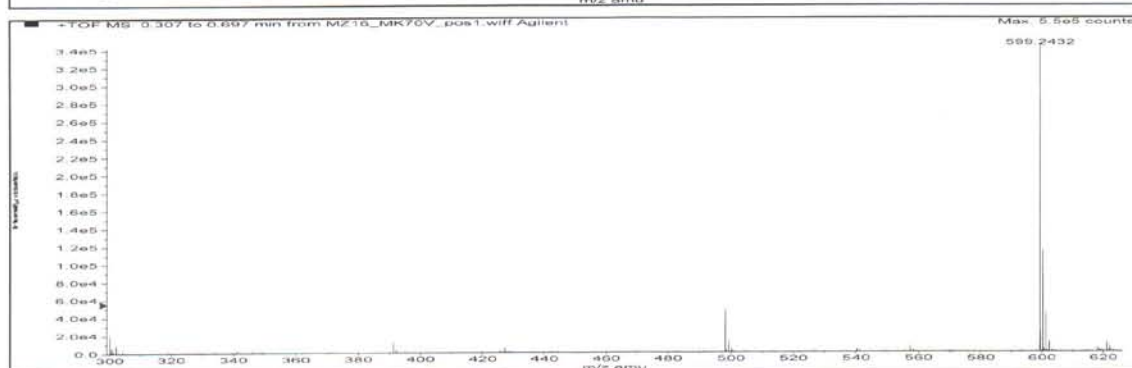

| Formula      | Compound name | Mass      | Peak RT (min) | Peak area  | Description |
|--------------|---------------|-----------|---------------|------------|-------------|
| C29H38N6O4S2 | —             | 598.23960 | 0.40          | 9.30051 E6 | —           |

| Species              | Abundance (counts) | Ion Mass  | Measured Mass | Error (mDa) | Error (ppm) | Ret. Time Error (min) |
|----------------------|--------------------|-----------|---------------|-------------|-------------|-----------------------|
| [M+2H] <sup>2+</sup> | 20361.33           | 300.12707 | 300.12731     | 0.23612     | 0.79        | --                    |
| [M+H] <sup>+</sup>   | 344152.86          | 599.24687 | 599.24660     | -0.27645    | -0.46       | --                    |
| [M+Na] <sup>+</sup>  | 11180.87           | 621.22882 | 621.22859     | -0.22286    | -0.36       | --                    |

## Compound **2d**

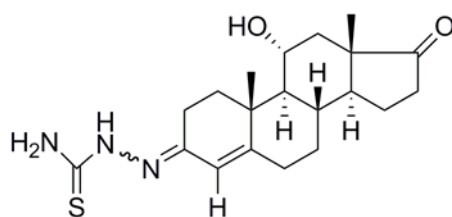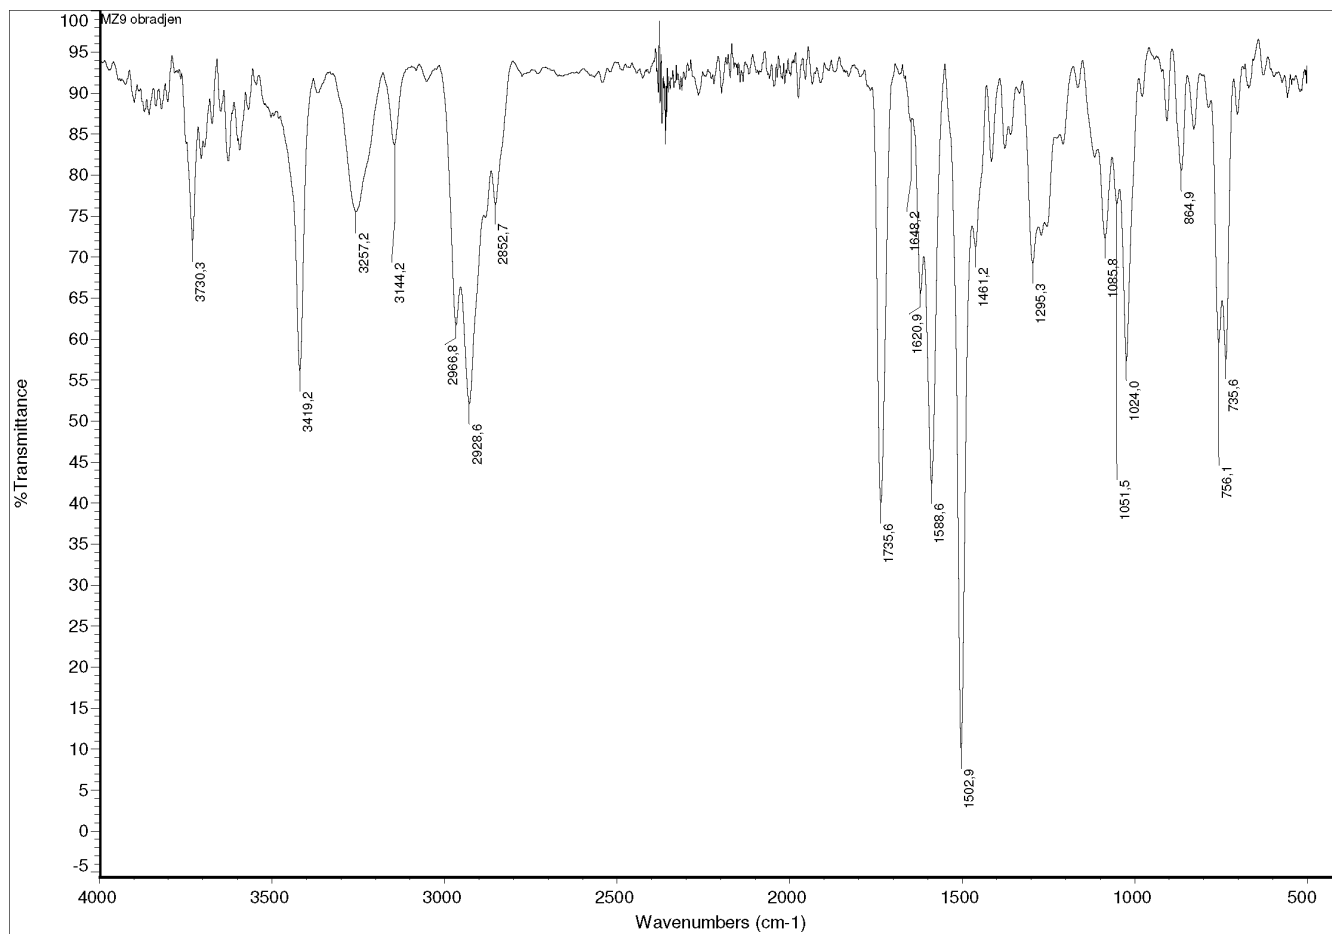

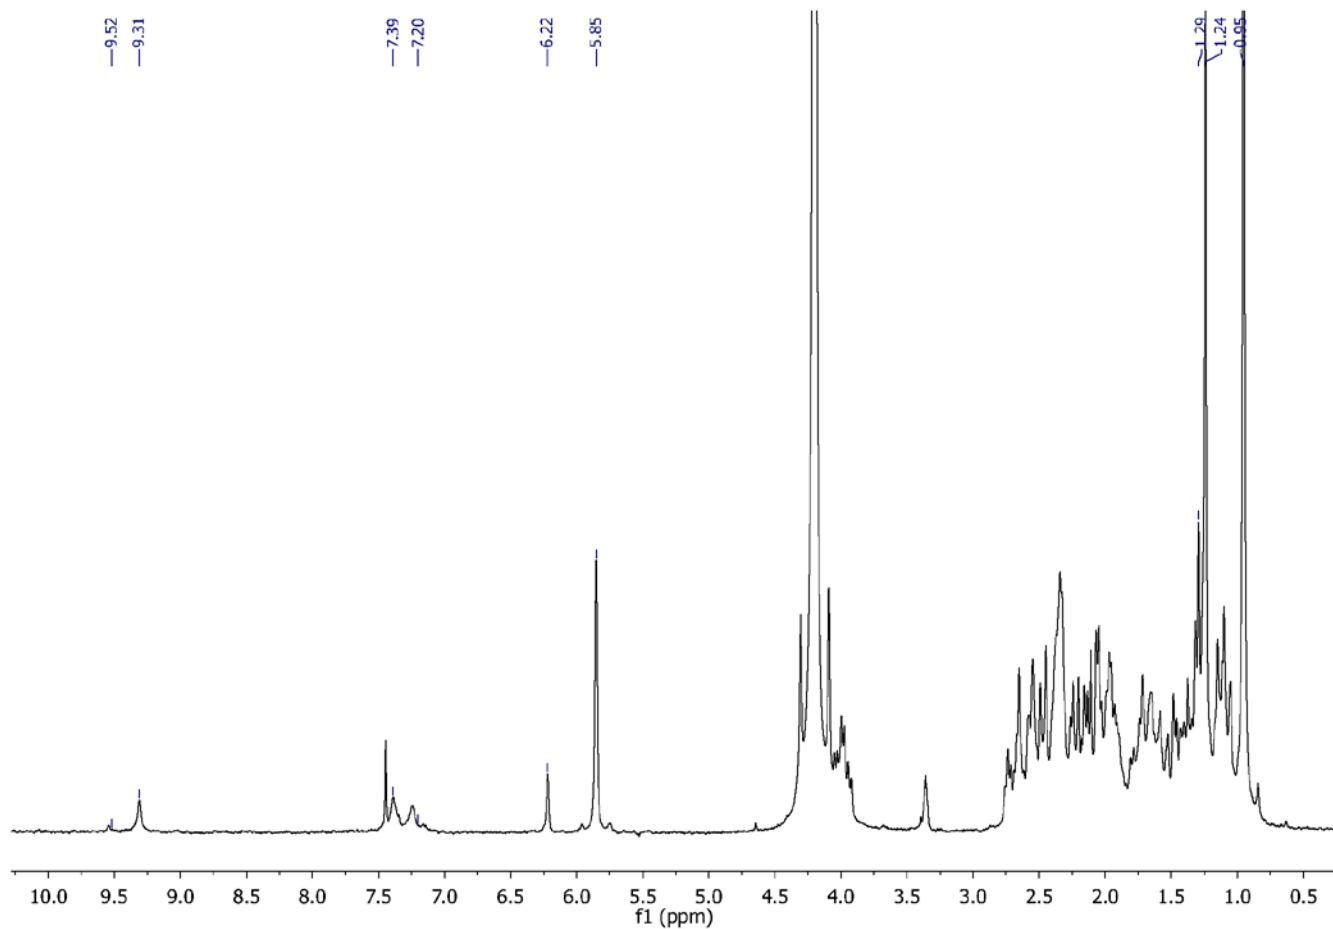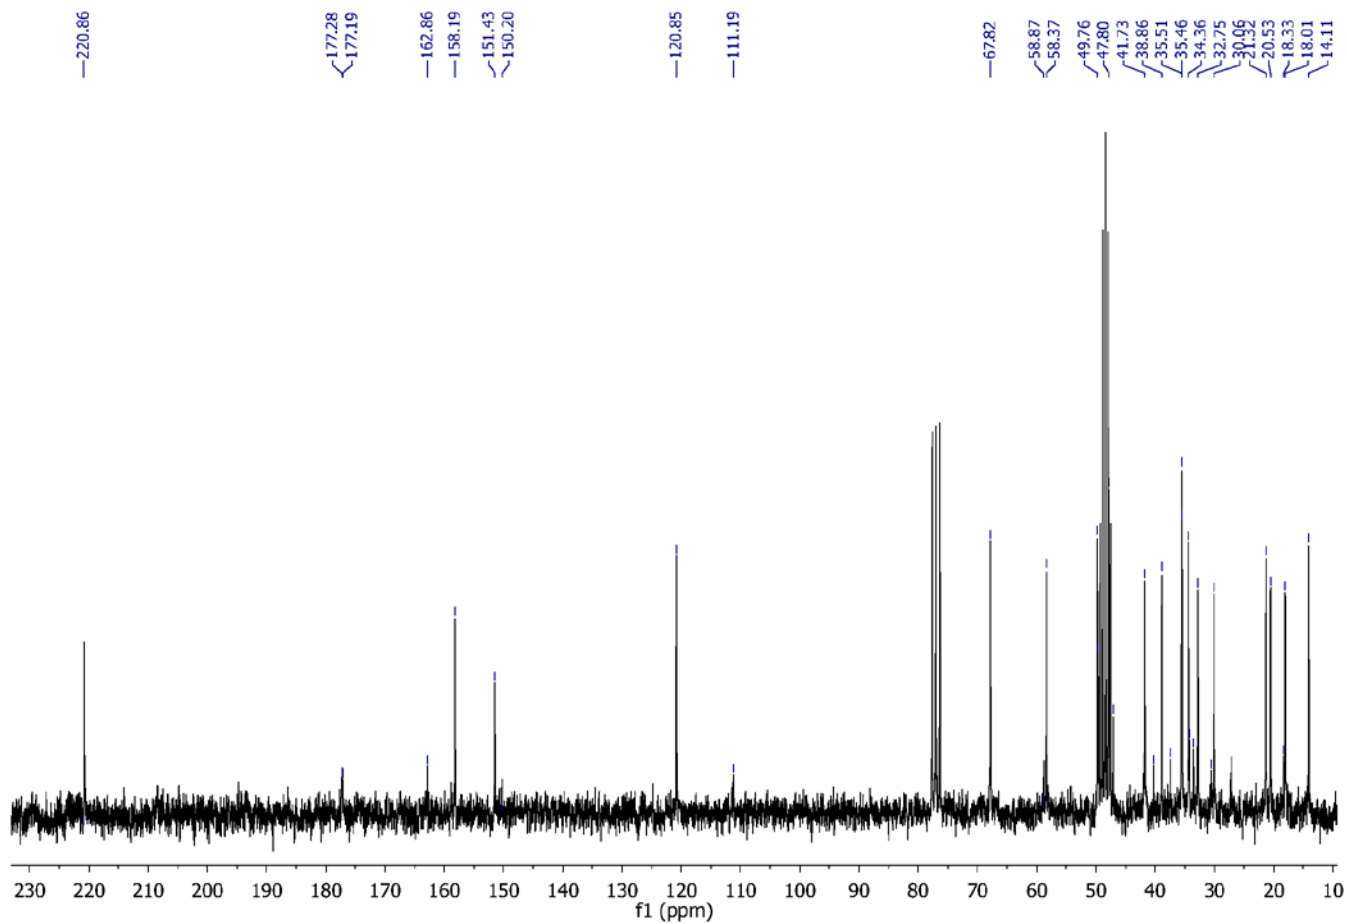

Sample Name: **MZ9** Sample Location: **P1-D1** Sample Id: Operator: **Milka**  
 Data File Name: **D:\PE Sciex Data\Projects\SladiciData\MZ9\_AF70V\_pos1.wiff** Acq Time: **May 07 2015, 11:21:01 AM**  
 Method: **d:\TOF\_Data\damethods\Night\_Seq\_Comp\_ident1.anmlefc.xml**

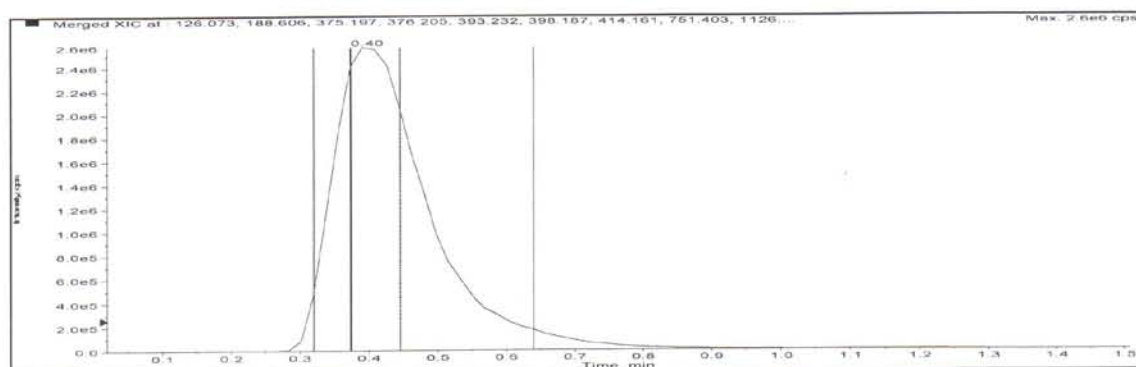

Merged XIC, Period# : 1 Experiment# : 1

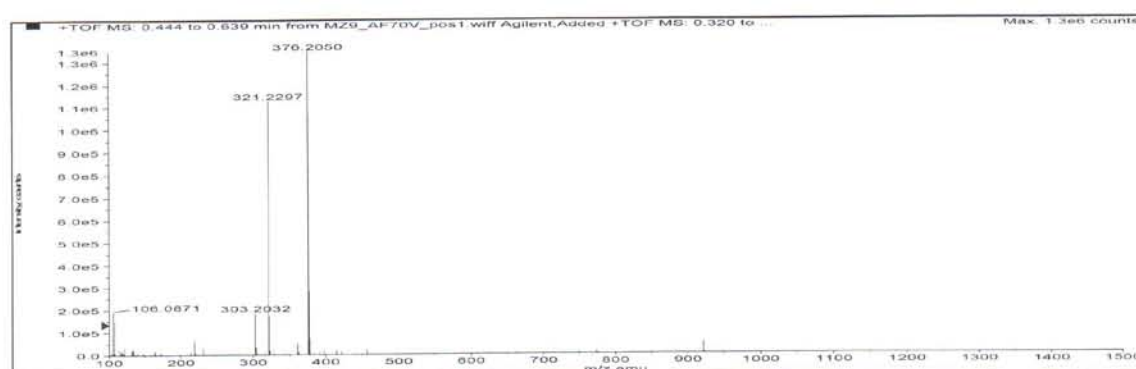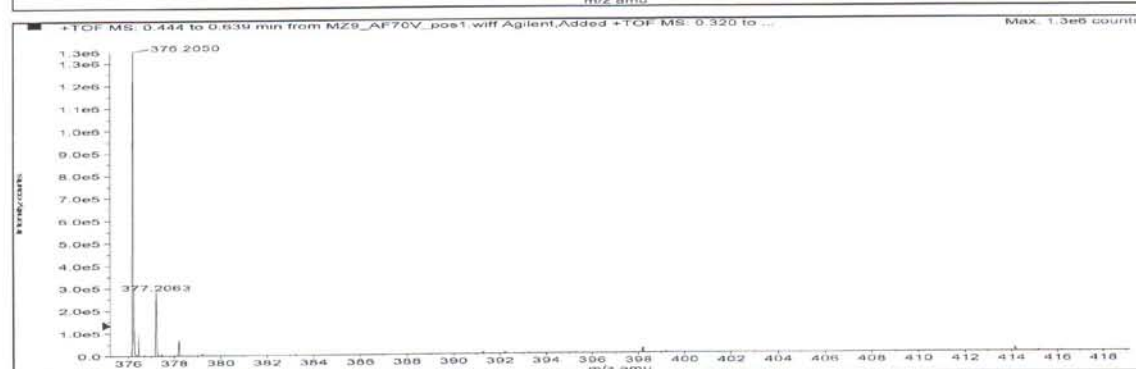

| Formula                                                         | Compound name | Mass      | Peak RT (min) | Peak area  | Description |
|-----------------------------------------------------------------|---------------|-----------|---------------|------------|-------------|
| C <sub>20</sub> H <sub>29</sub> N <sub>3</sub> O <sub>2</sub> S | --            | 375.19805 | 0.40          | 2.45542 E7 | --          |

| Species             | Abundance (counts) | Ion Mass  | Measured Mass | Error (mDa) | Error (ppm) | Ret. Time Error (min) |
|---------------------|--------------------|-----------|---------------|-------------|-------------|-----------------------|
| [M+H] <sup>+</sup>  | 1349547.36         | 376.20532 | 376.20446     | -0.86587    | -2.30       | --                    |
| [M+Na] <sup>+</sup> | 22984.79           | 398.18727 | 398.18694     | -0.33013    | -0.83       | --                    |
| [M+K] <sup>+</sup>  | 14207.43           | 414.16121 | 414.16159     | 0.37987     | 0.92        | --                    |

# Compound **2d-OAc**

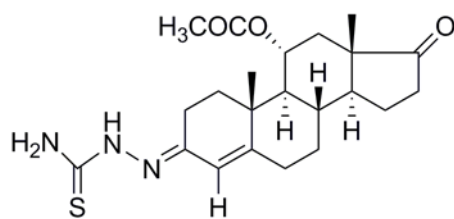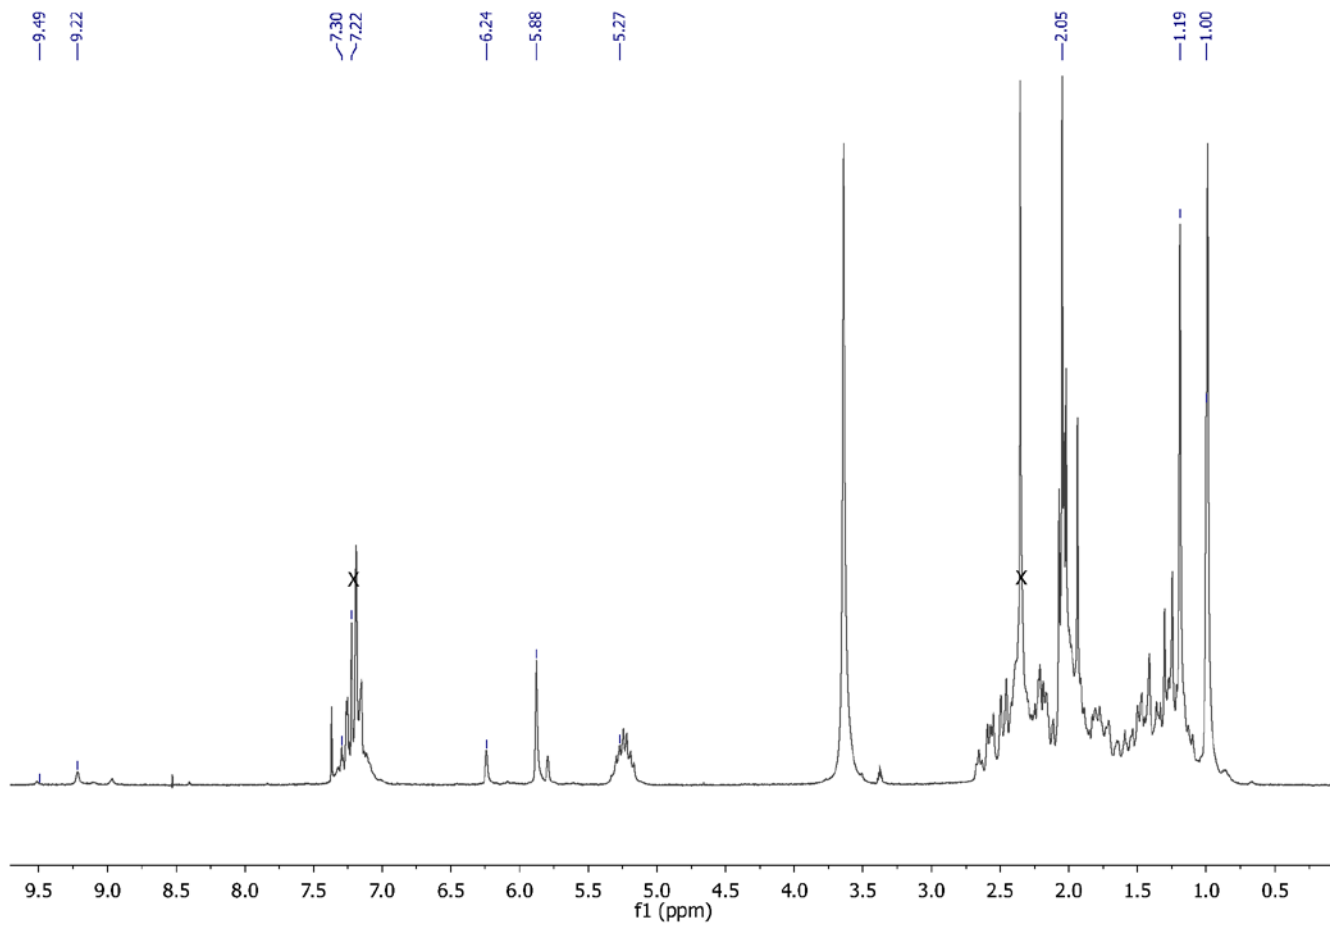

## Compound 3d

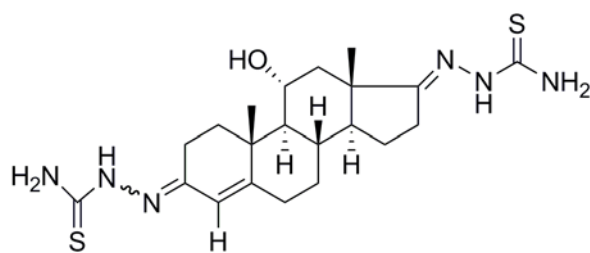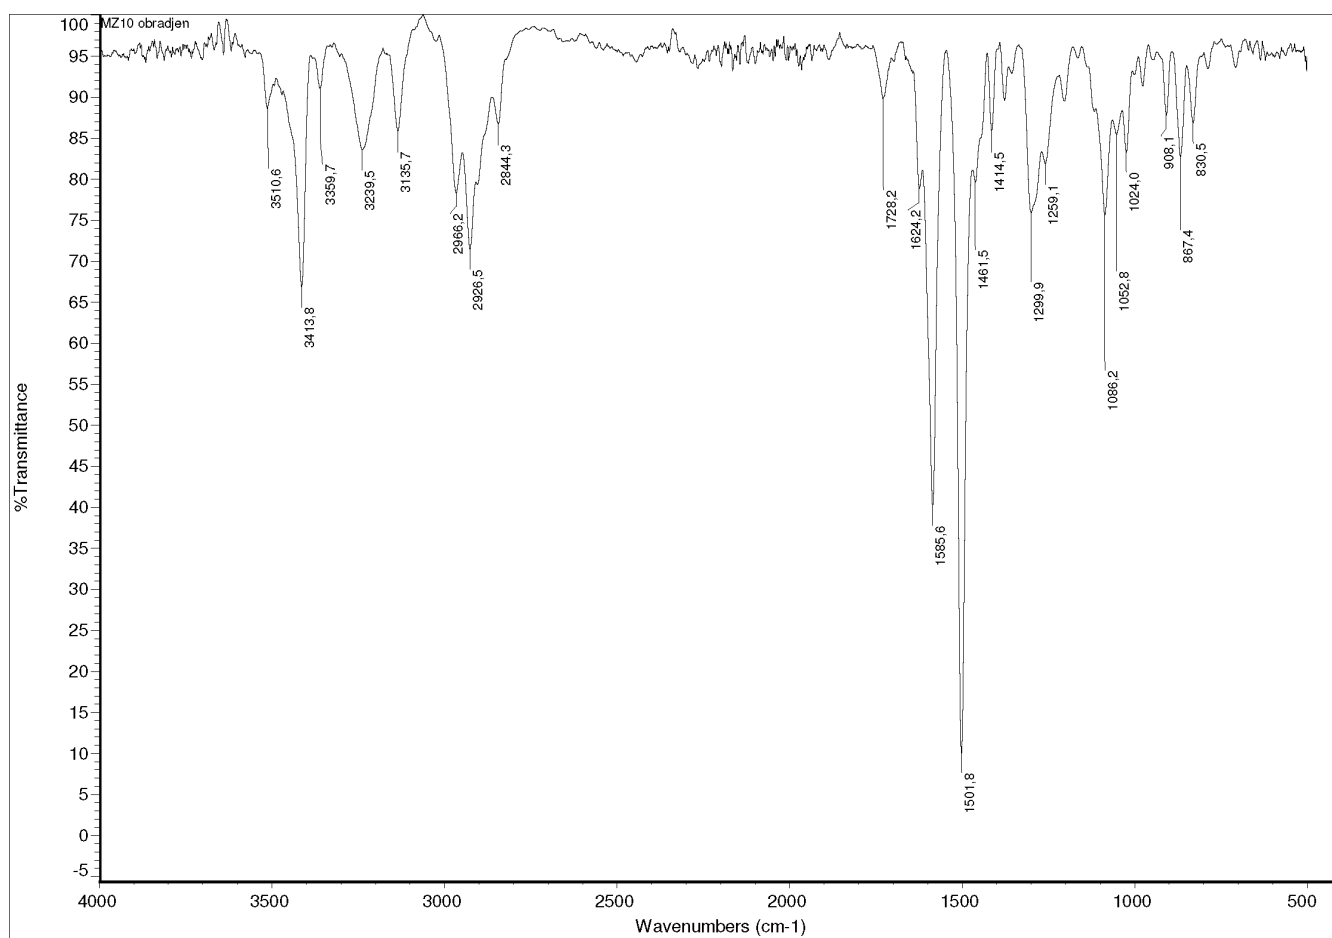

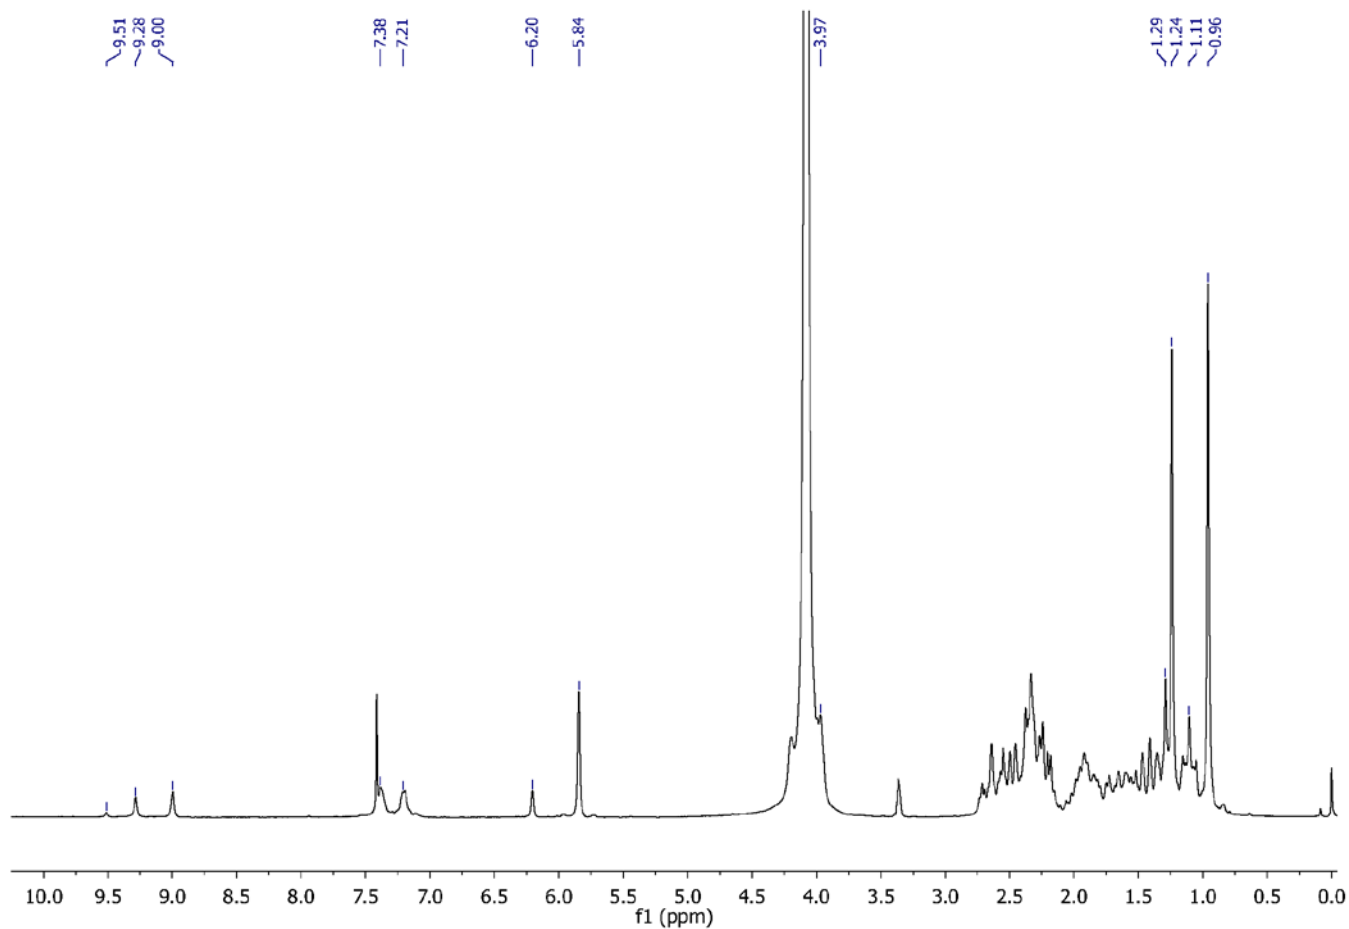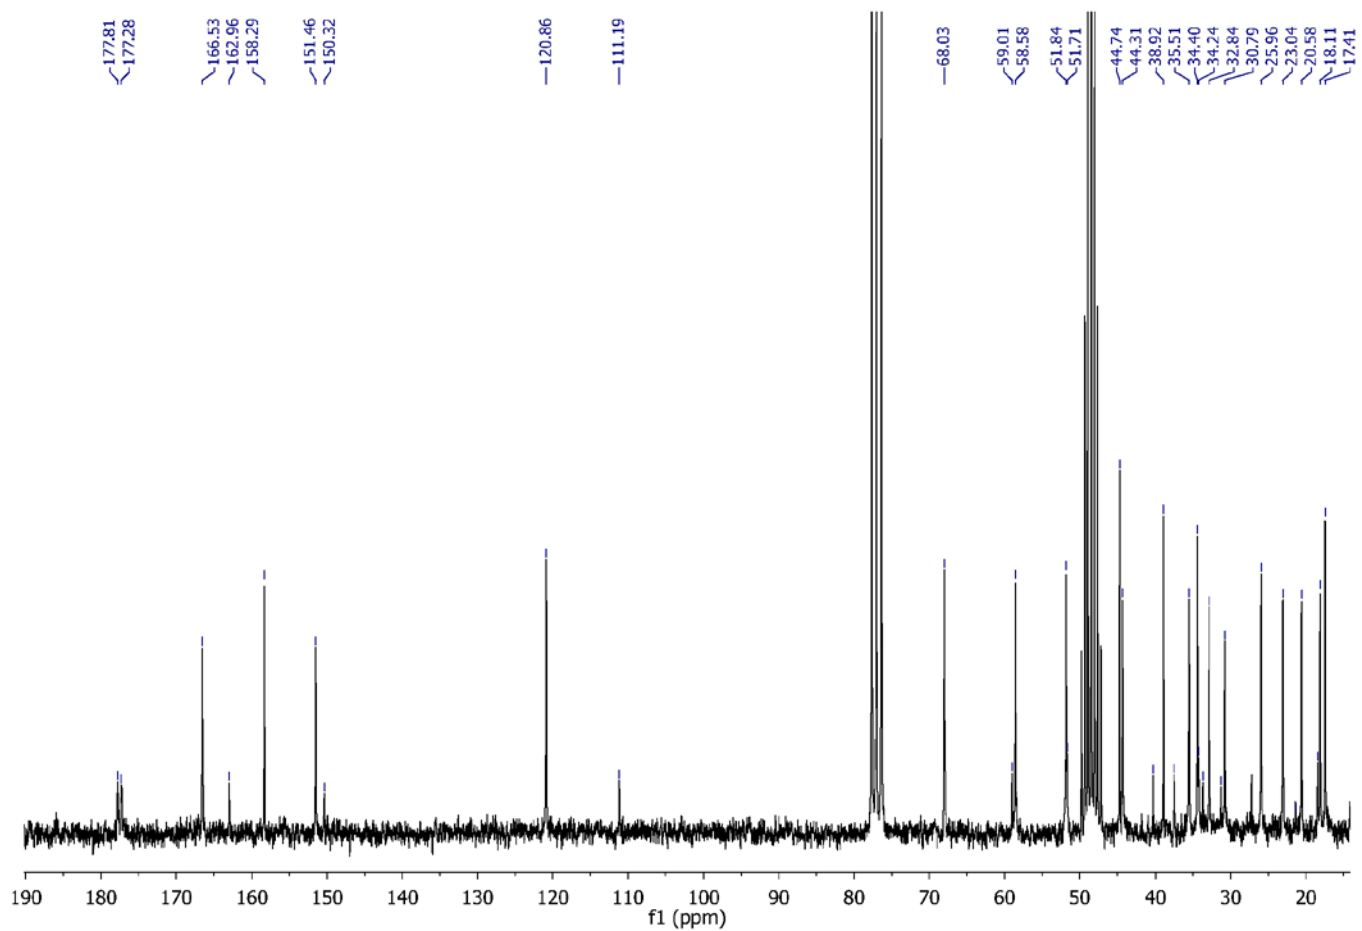

Sample Name: MZ10 Sample Location: P1-D2 Sample Id: Operator: Milka  
 Data File Name: D:\PE Sciex Data\Projects\Sladic\Data\MZ10\_AF70V\_pos1.wiff Acq Time: May 07 2015, 11:23:36 AM  
 Method: d:\TOF\_Data\damethods\Night\_Seq\_Comp\_ident1.anm\efc.xml

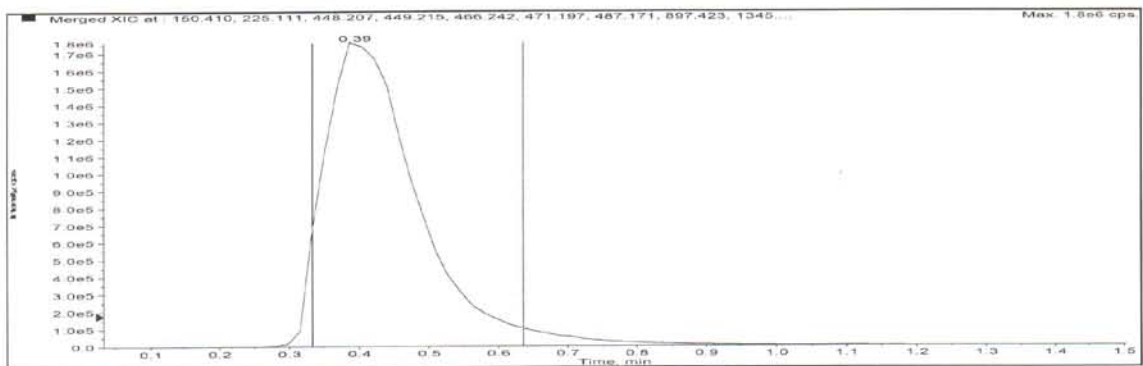

Merged XIC, Period# : 1 Experiment# : 1

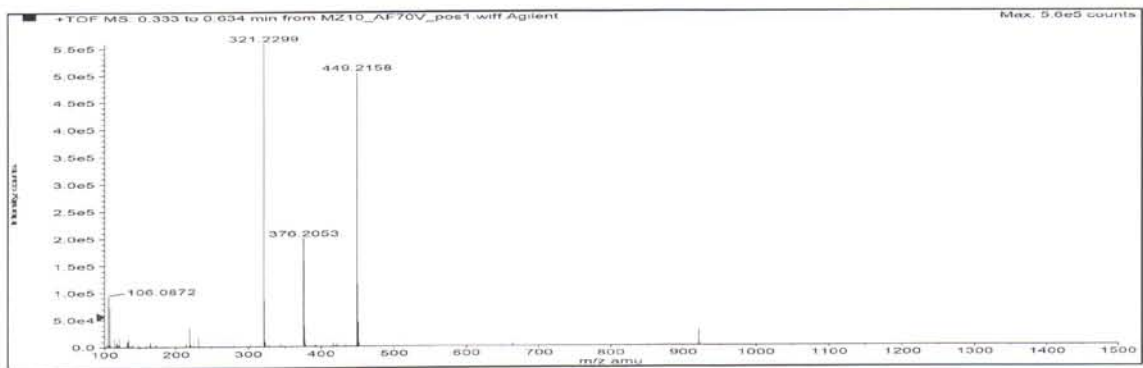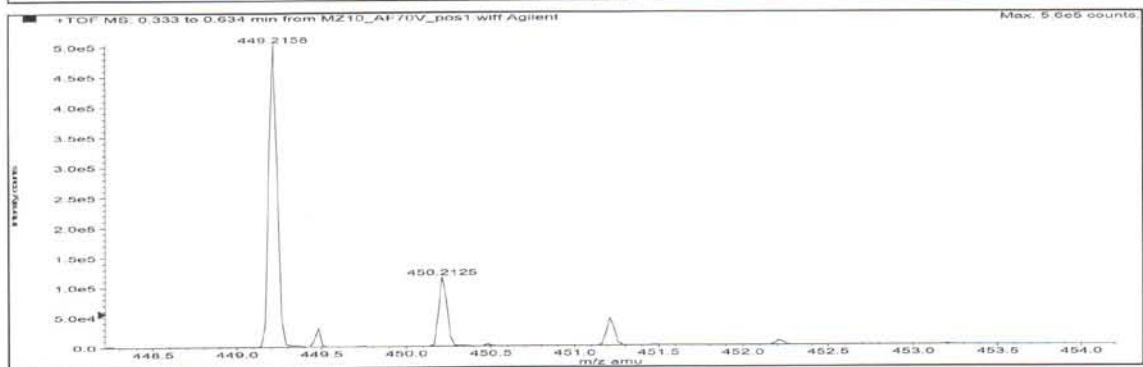

| Formula     | Compound name | Mass      | Peak RT (min) | Peak area  | Description |
|-------------|---------------|-----------|---------------|------------|-------------|
| C21H32N6OS2 | —             | 448.20790 | 0.39          | 1.63724 E7 | —           |

| Species            | Abundance (counts) | Ion Mass  | Measured Mass | Error (mDa) | Error (ppm) | Ret. Time Error (min) |
|--------------------|--------------------|-----------|---------------|-------------|-------------|-----------------------|
| [M+H] <sup>+</sup> | 505028.62          | 449.21518 | 449.21447     | -0.70987    | -1.58       | —                     |

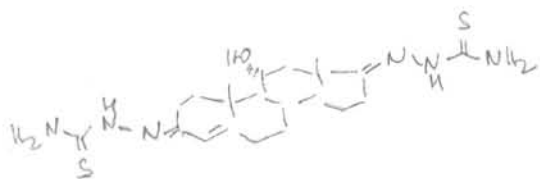

## Compound **4d-OAc**

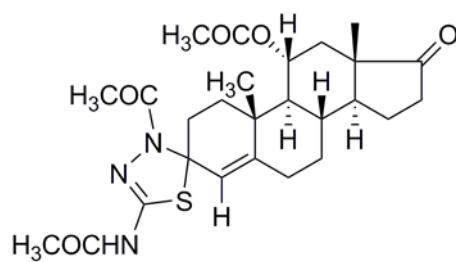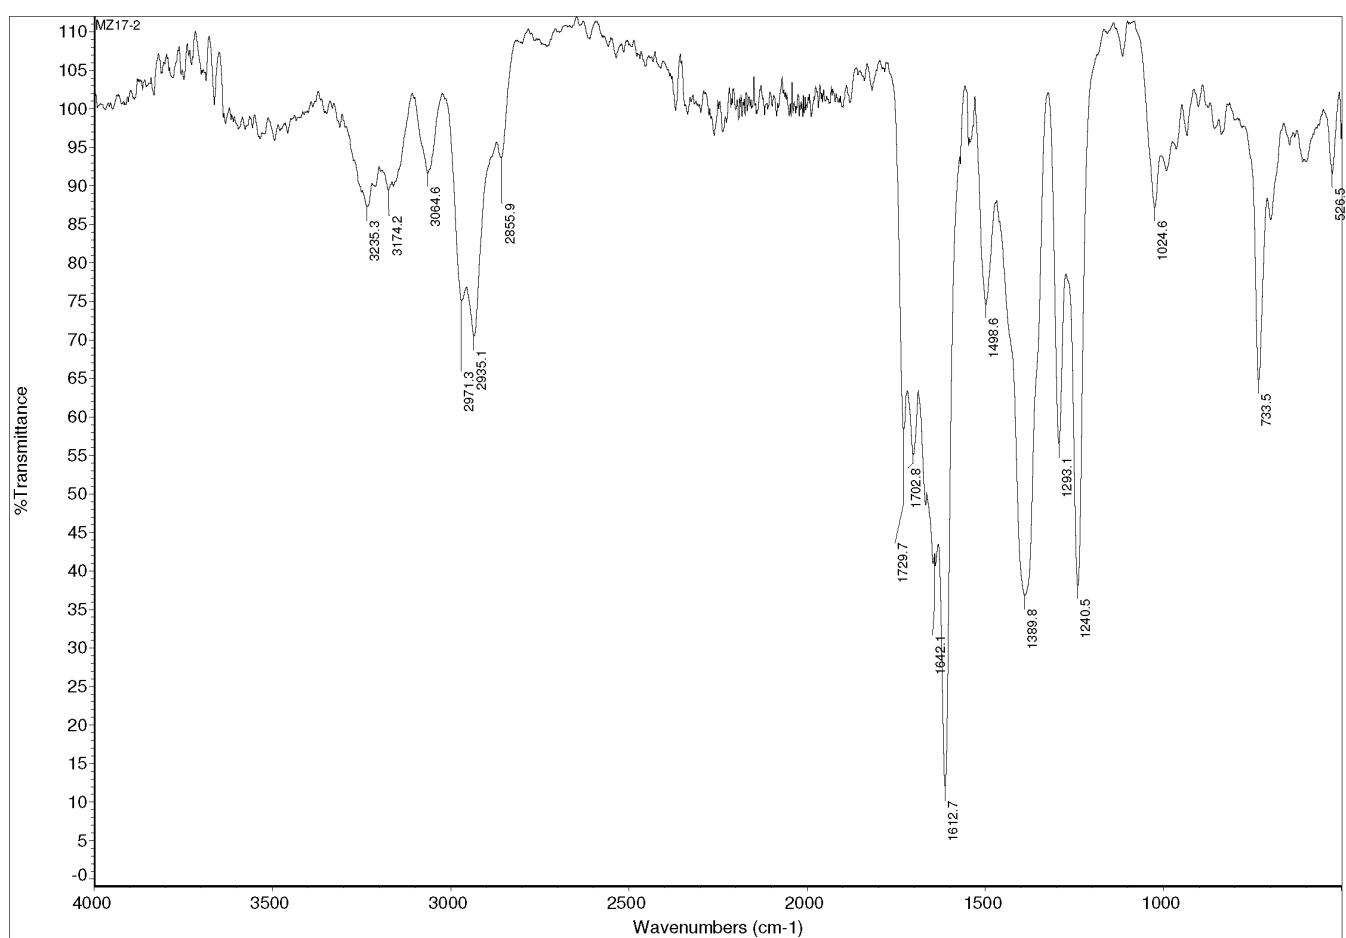

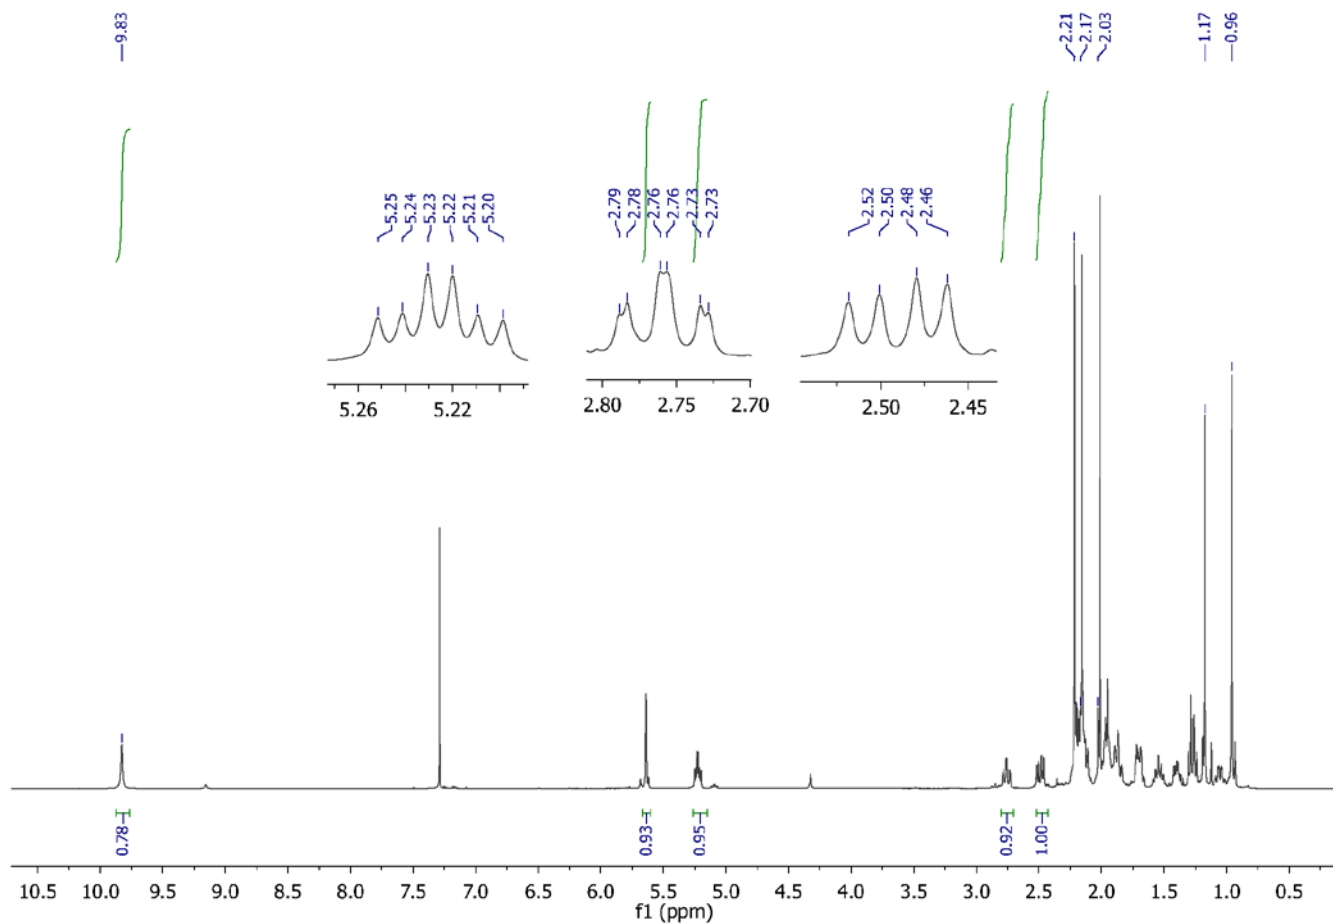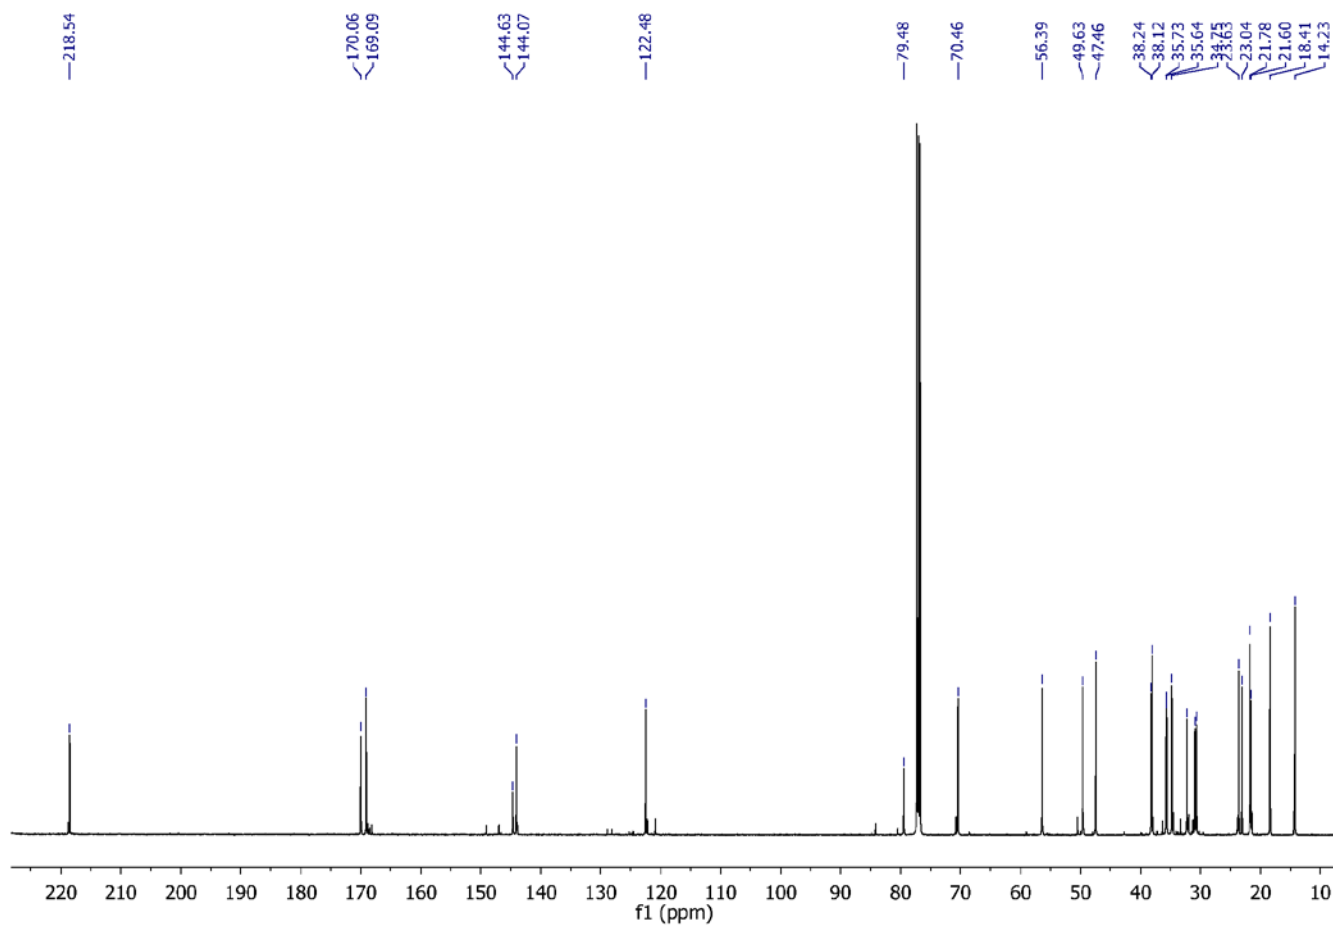

Sample Name: MZ17-2 Sample Location: P1-C7 Sample Id: Operator: Milka  
 Data File Name: D:\PE Sciex Data\Projects\Sladic\Data\MZ17-2\_MK70V\_pos1.wiff Acq Time: August 05 2014, 11:30:24 AM  
 Method: d:\TOF\_Data\damethods\Night\_Seq\_Comp\_ident1.an\lfe.c.xml

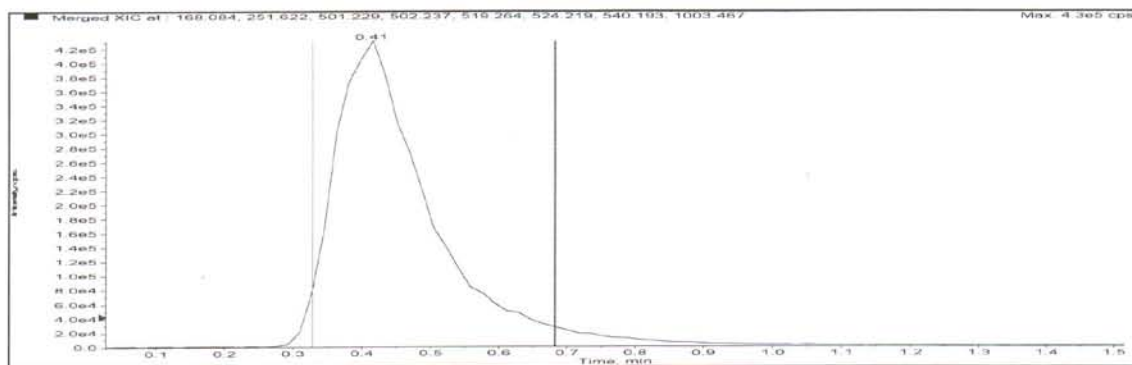

Merged XIC, Period# : 1 Experiment# : 1

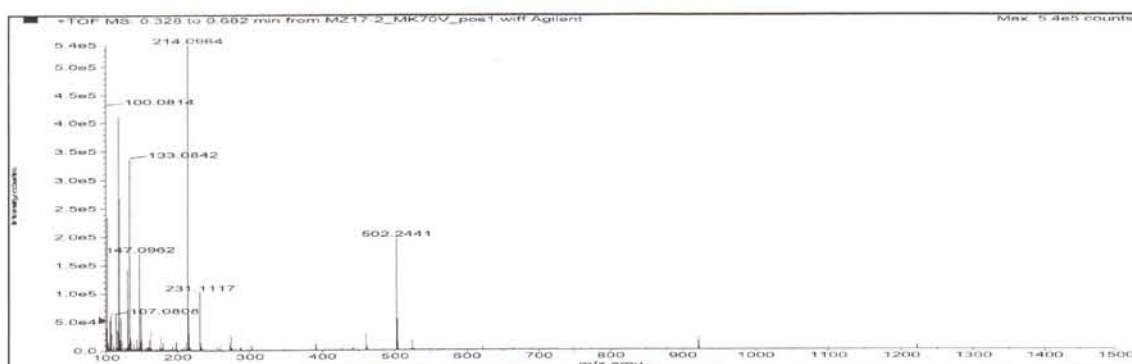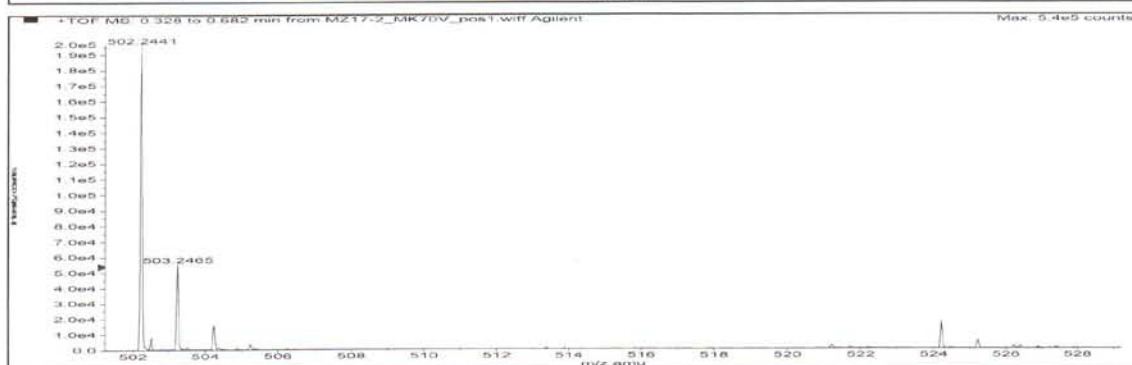

| Formula     | Compound name | Mass      | Peak RT (min) | Peak area  | Description |
|-------------|---------------|-----------|---------------|------------|-------------|
| C26H35N3O5S | —             | 501.22974 | 0.41          | 4.14084 E6 | —           |

| Species             | Abundance (counts) | Ion Mass  | Measured Mass | Error (mDa) | Error (ppm) | Ret. Time Error (min) |
|---------------------|--------------------|-----------|---------------|-------------|-------------|-----------------------|
| [M+H] <sup>+</sup>  | 201169.49          | 502.23702 | 502.23678     | -0.23730    | -0.47       | —                     |
| [M+Na] <sup>+</sup> | 17471.65           | 524.21896 | 524.21936     | 0.39577     | 0.75        | —                     |

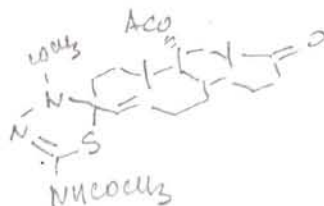

## Compound **4d-OH**

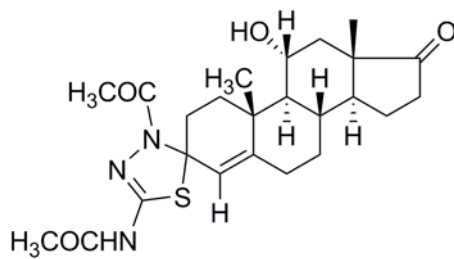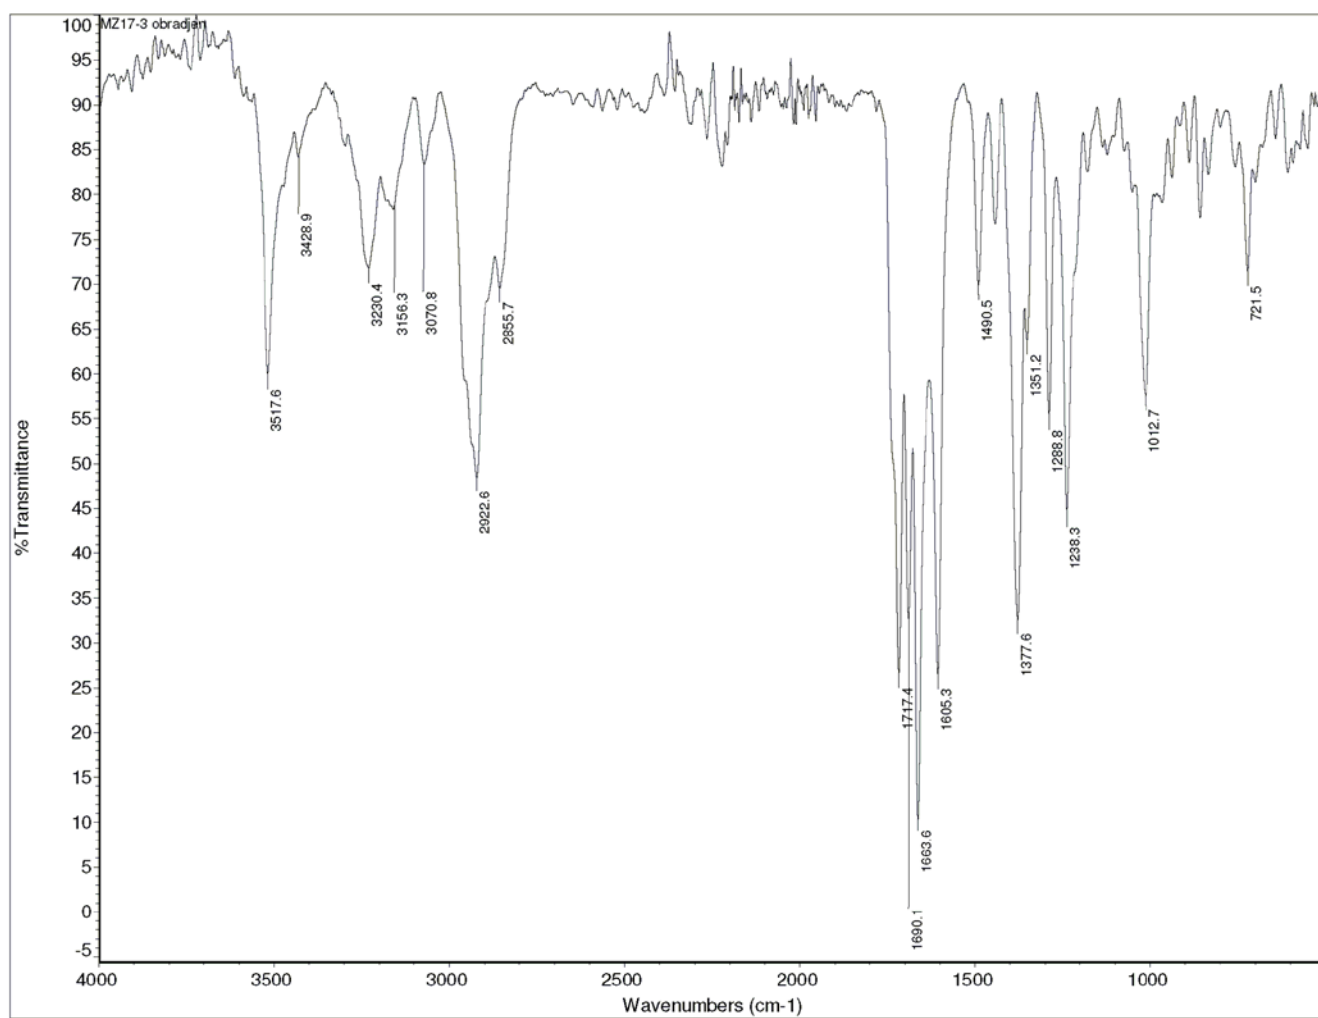

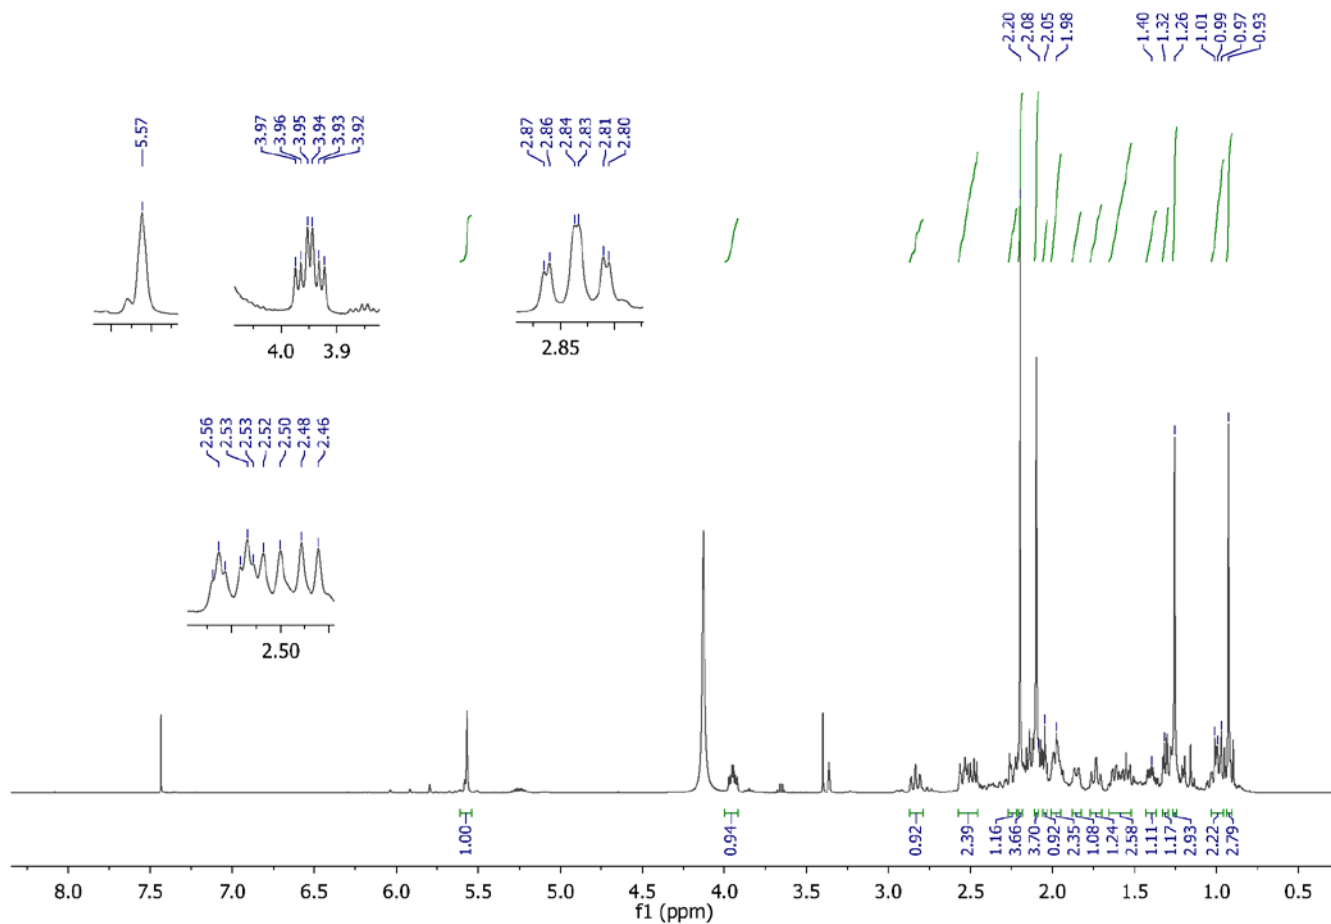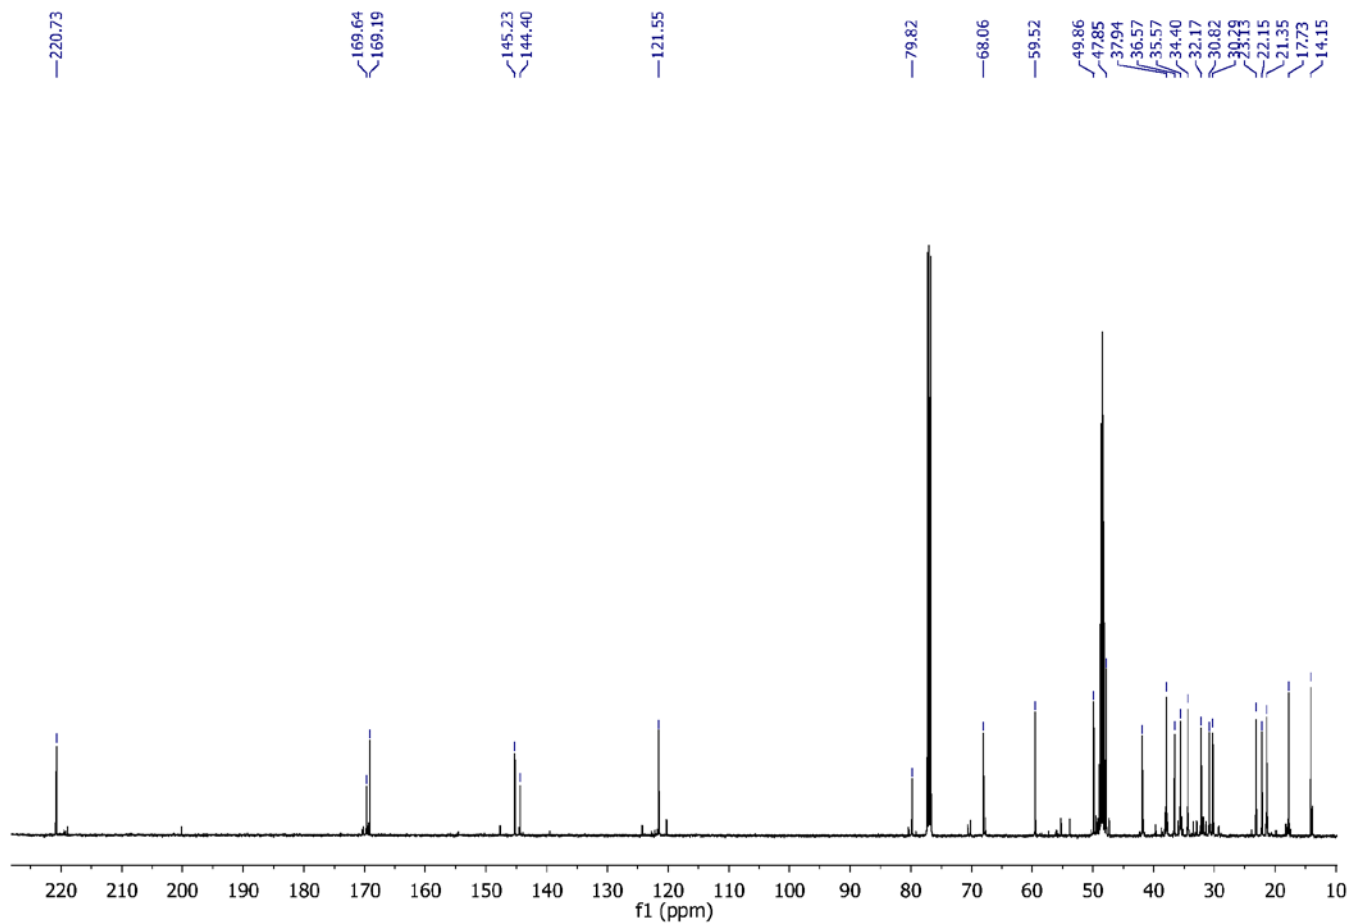

Sample Name: MZ17-3 Sample Location: P1-D3 Sample Id: Operator: Milka  
 Data File Name: D:\PE Sclex Data\Projects\SladlcData\MZ17-3\_AF70V\_pos1.wiff Acq Time: May 07 2015, 11:26:09 AM  
 Method: d:\TOF\_Data\damethods\Night\_Seq\_Comp\_ident1.anmlefc.xml

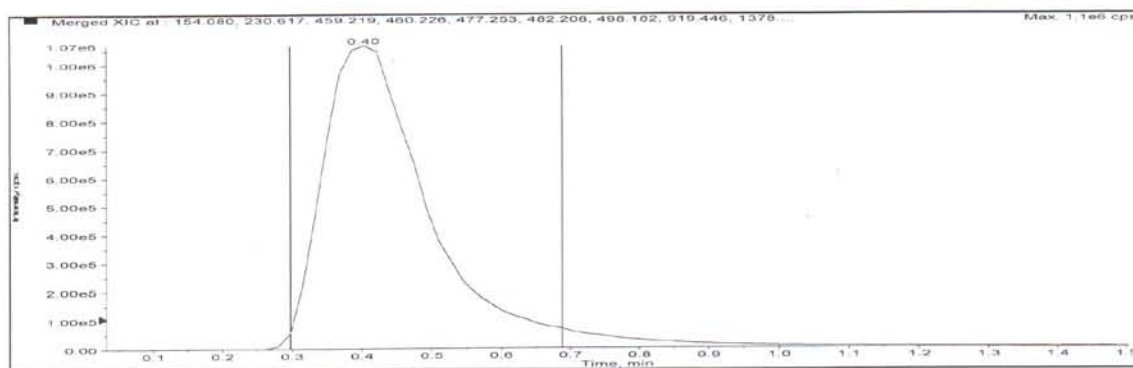

Merged XIC, Period# : 1 Experiment# : 1

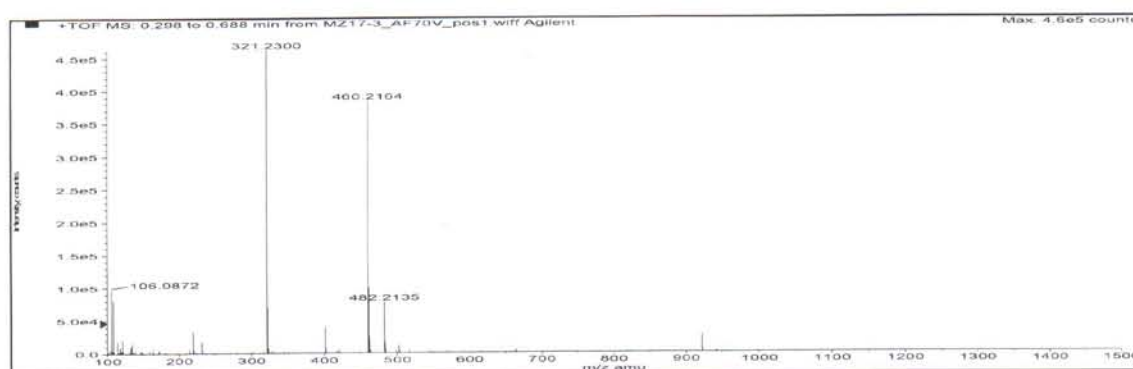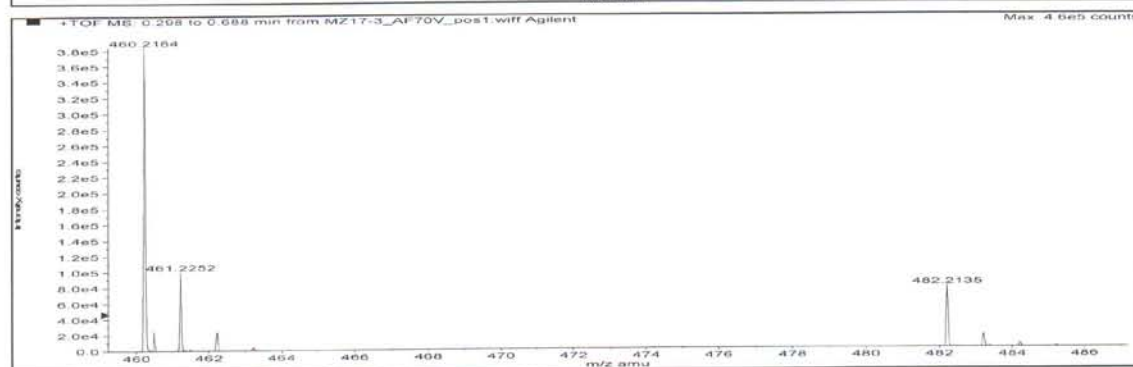

| Formula     | Compound name | Mass      | Peak RT (min) | Peak area  | Description |
|-------------|---------------|-----------|---------------|------------|-------------|
| C24H33N3O4S | --            | 459.21918 | 0.40          | 1.11991 E7 | --          |

| Species             | Abundance (counts) | Ion Mass  | Measured Mass | Error (mDa) | Error (ppm) | Ret. Time Error (min) |
|---------------------|--------------------|-----------|---------------|-------------|-------------|-----------------------|
| [M+H] <sup>+</sup>  | 401111.19          | 460.22645 | 460.22563     | -0.82686    | -1.80       | --                    |
| [M+Na] <sup>+</sup> | 78642.74           | 482.20840 | 482.20780     | -0.59397    | -1.23       | --                    |

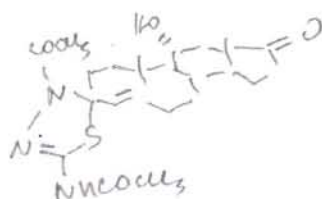

## Compound 5d

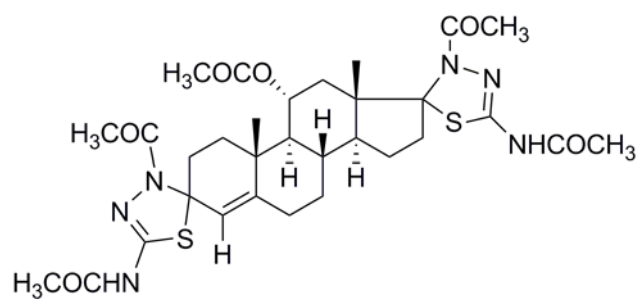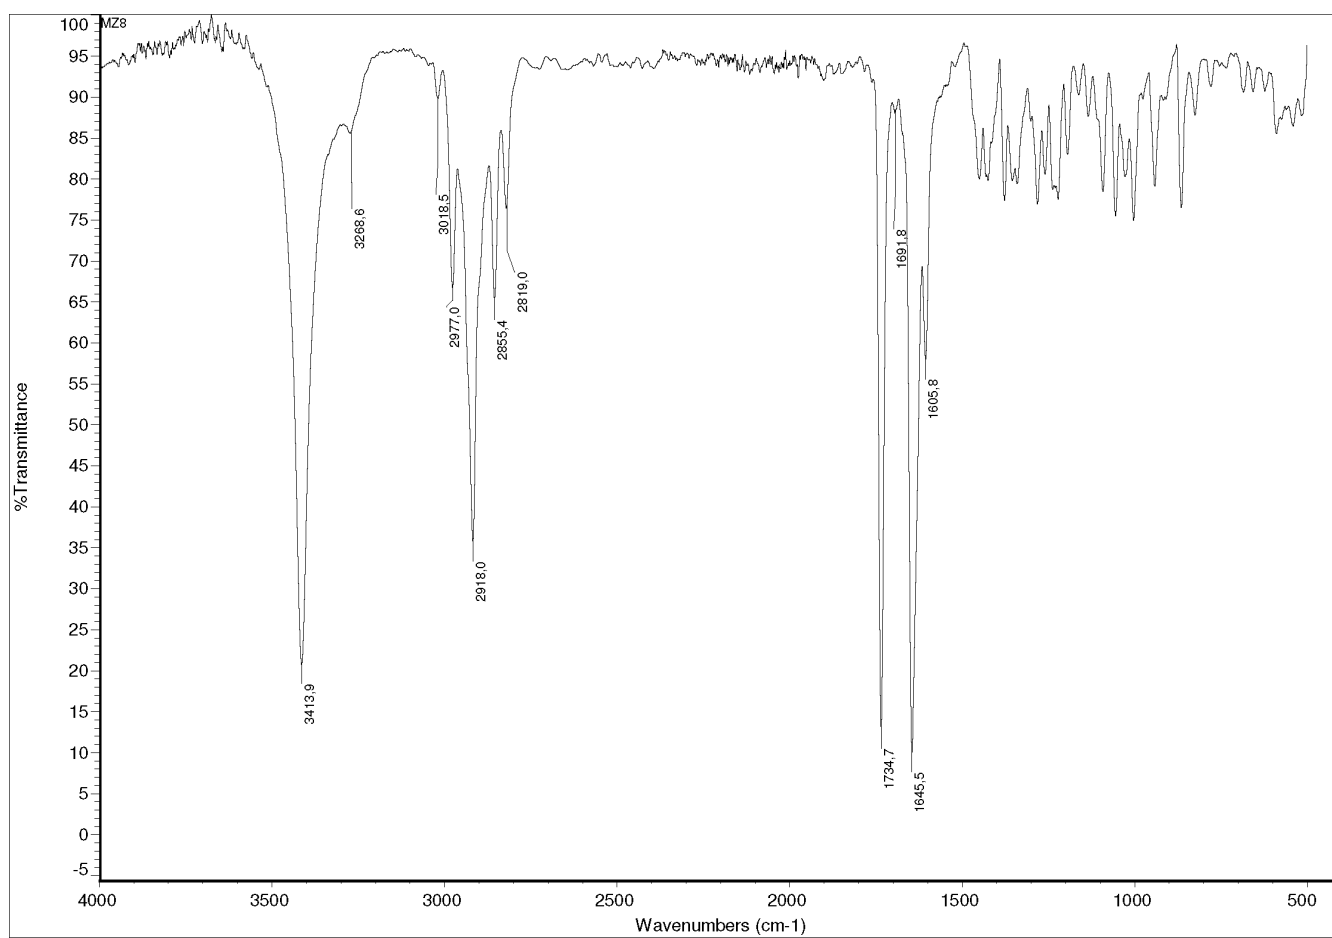

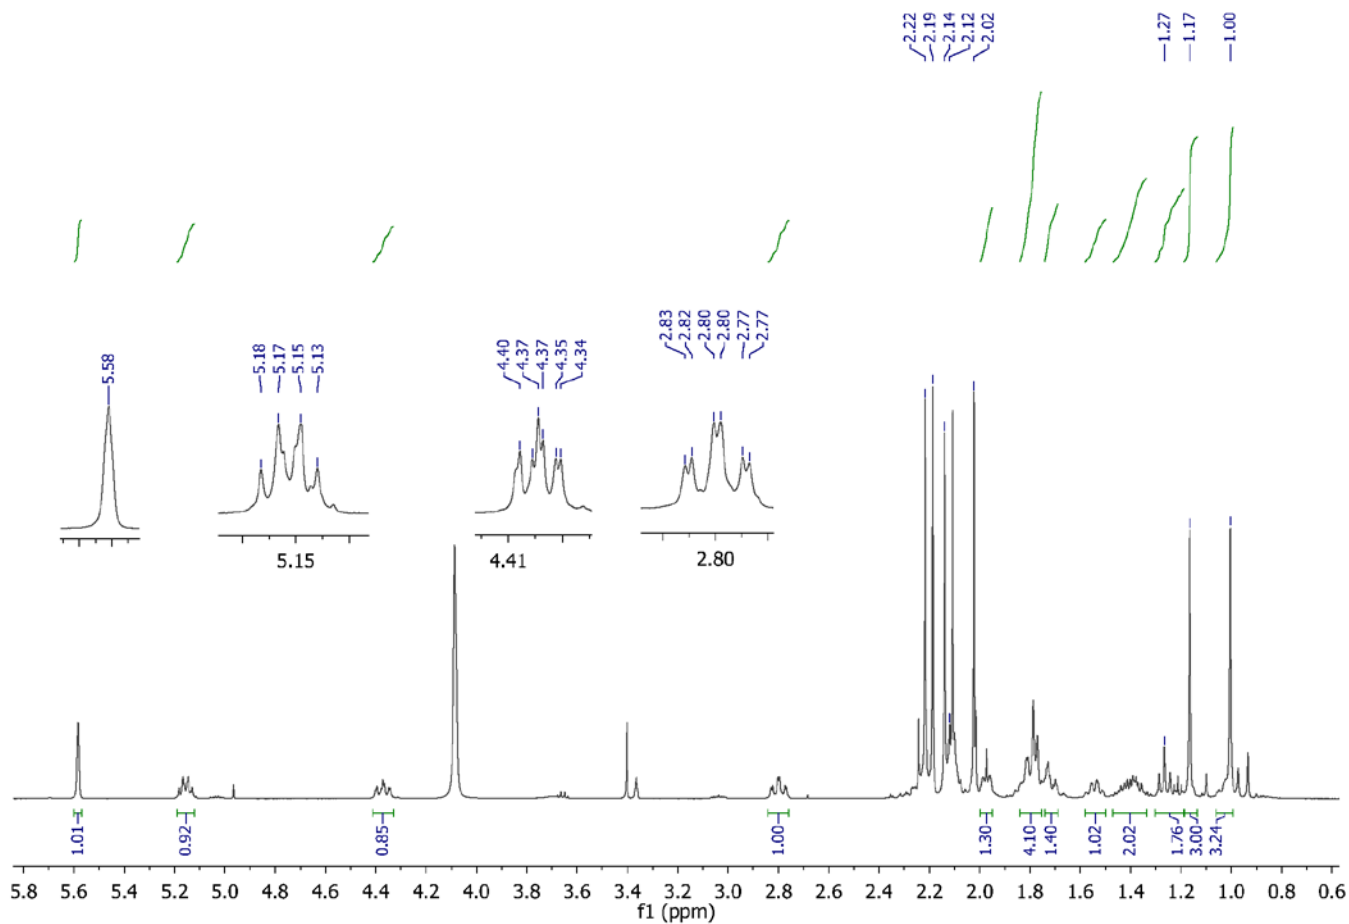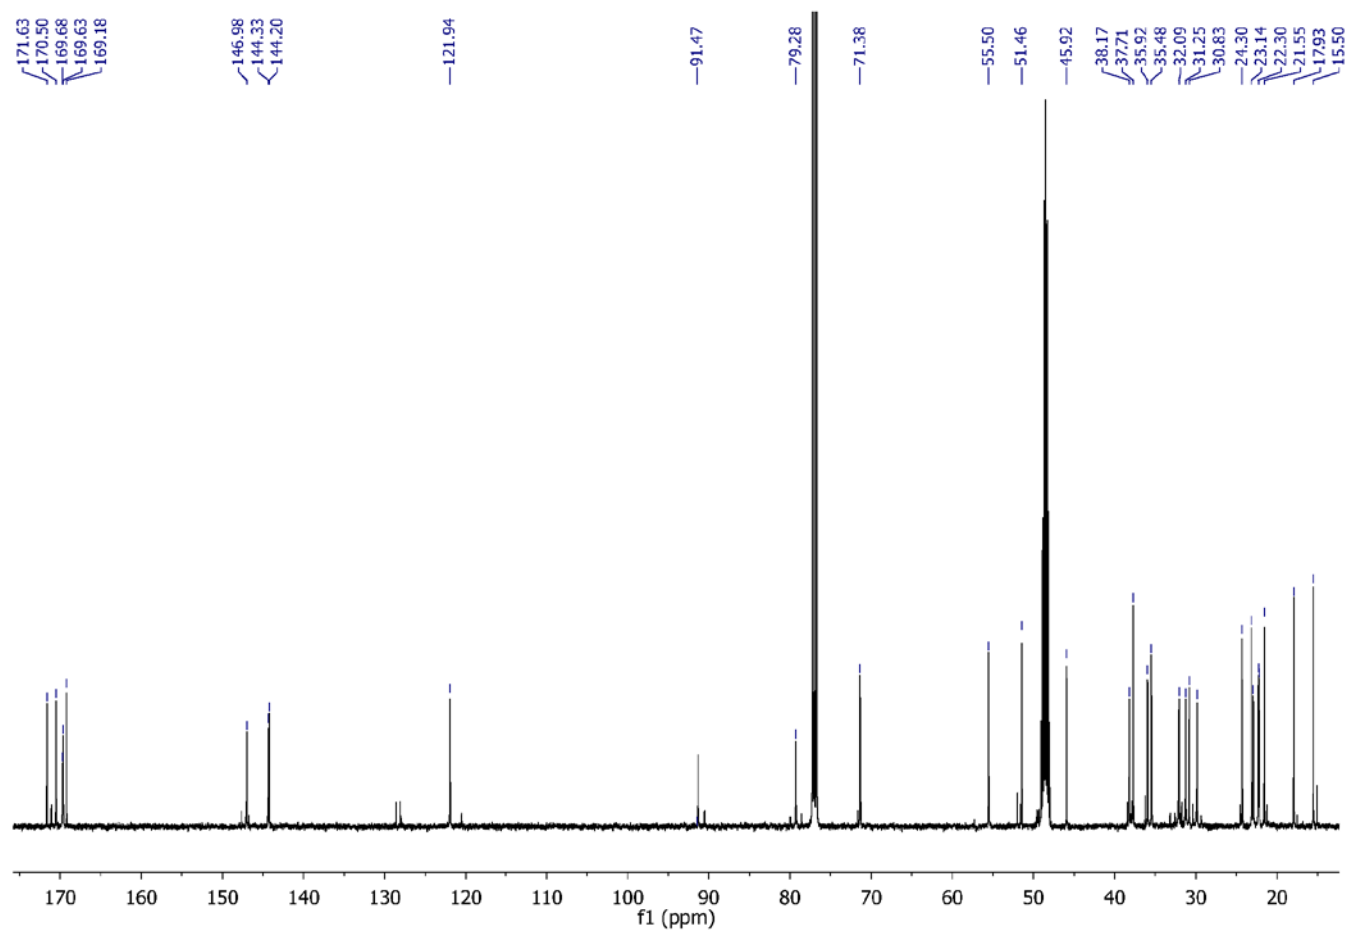

Sample Name: MZ18-2 Sample Location: P1-C8 Sample Id: Operator: Milka  
 Data File Name: D:\PE Sciex Data\Projects\Sladic\Data\MZ18-2\_MK70V\_pos1.wiff Acq Time: August 05 2014, 11:32:53 AM  
 Method: d:\TOF\_Data\damethods\Night Seq Comp\_ident1.anmlefc.xml

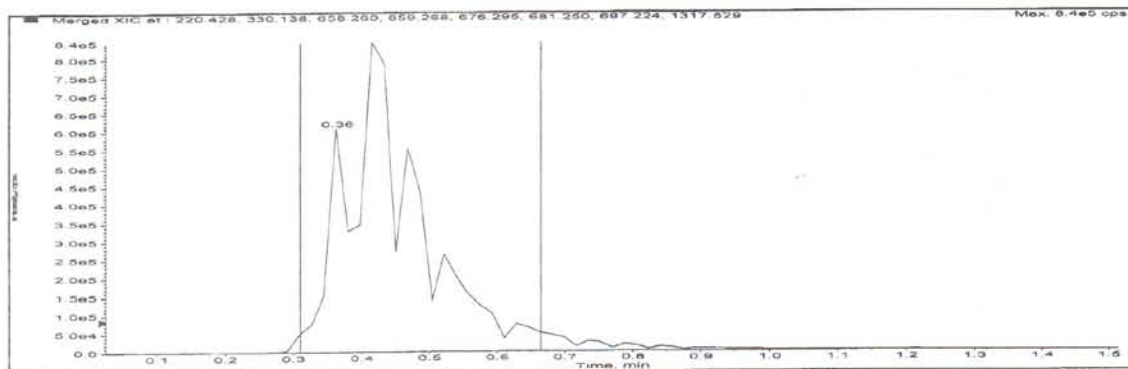

Merged XIC, Period# : 1 Experiment# : 1

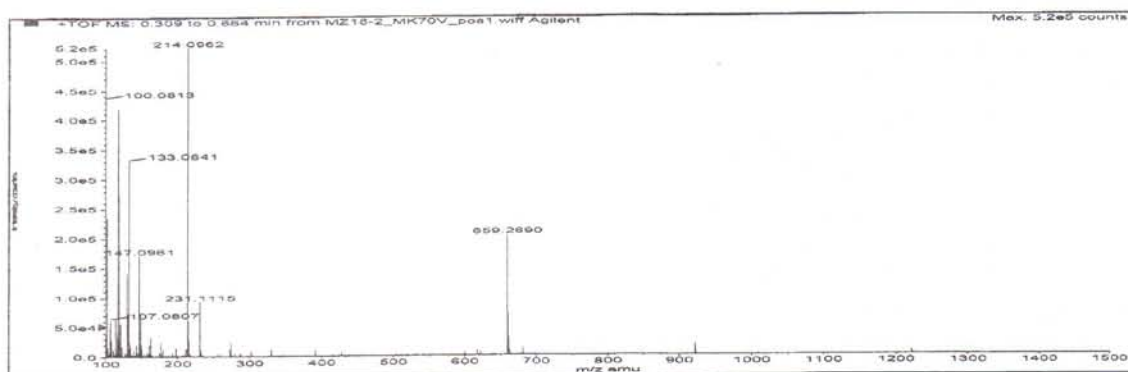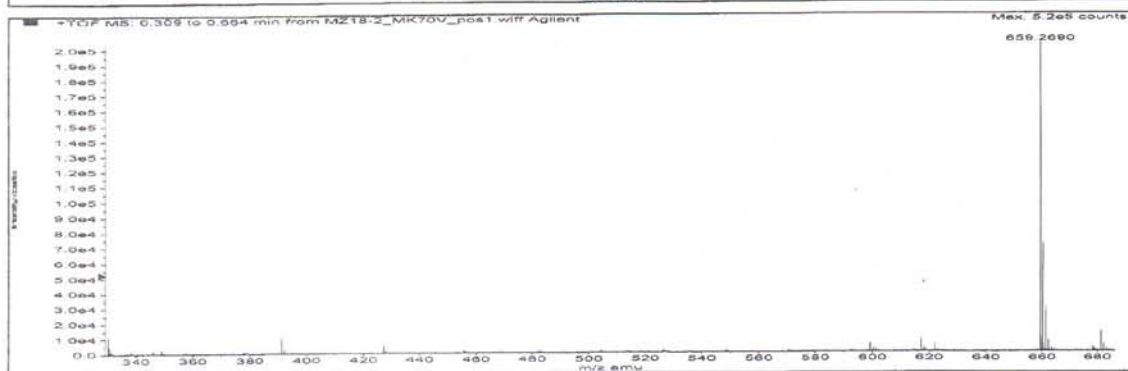

| Formula                                                                      | Compound name | Mass      | Peak RT (min) | Peak area  | Description |
|------------------------------------------------------------------------------|---------------|-----------|---------------|------------|-------------|
| C <sub>31</sub> H <sub>42</sub> N <sub>6</sub> O <sub>6</sub> S <sub>2</sub> | --            | 658.26072 | 0.42          | 6.22477 E6 | --          |

| Species              | Abundance (counts) | Ion Mass  | Measured Mass | Error (mDa) | Error (ppm) | Ret. Time Error (min) |
|----------------------|--------------------|-----------|---------------|-------------|-------------|-----------------------|
| [M+2H] <sup>2+</sup> | 11227.02           | 330.13764 | 330.13822     | 0.57808     | 1.75        | --                    |
| [M+H] <sup>+</sup>   | 203144.82          | 659.26800 | 659.26750     | -0.50395    | -0.76       | --                    |
| [M+Na] <sup>+</sup>  | 13686.55           | 681.24995 | 681.24989     | -0.05726    | -0.08       | --                    |

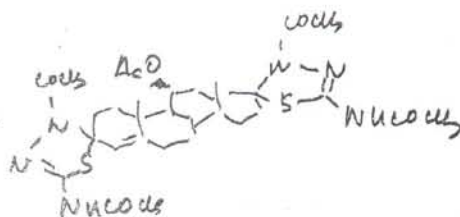

## Compound 2e

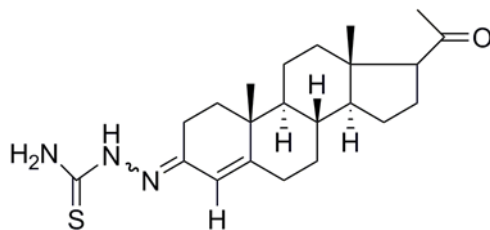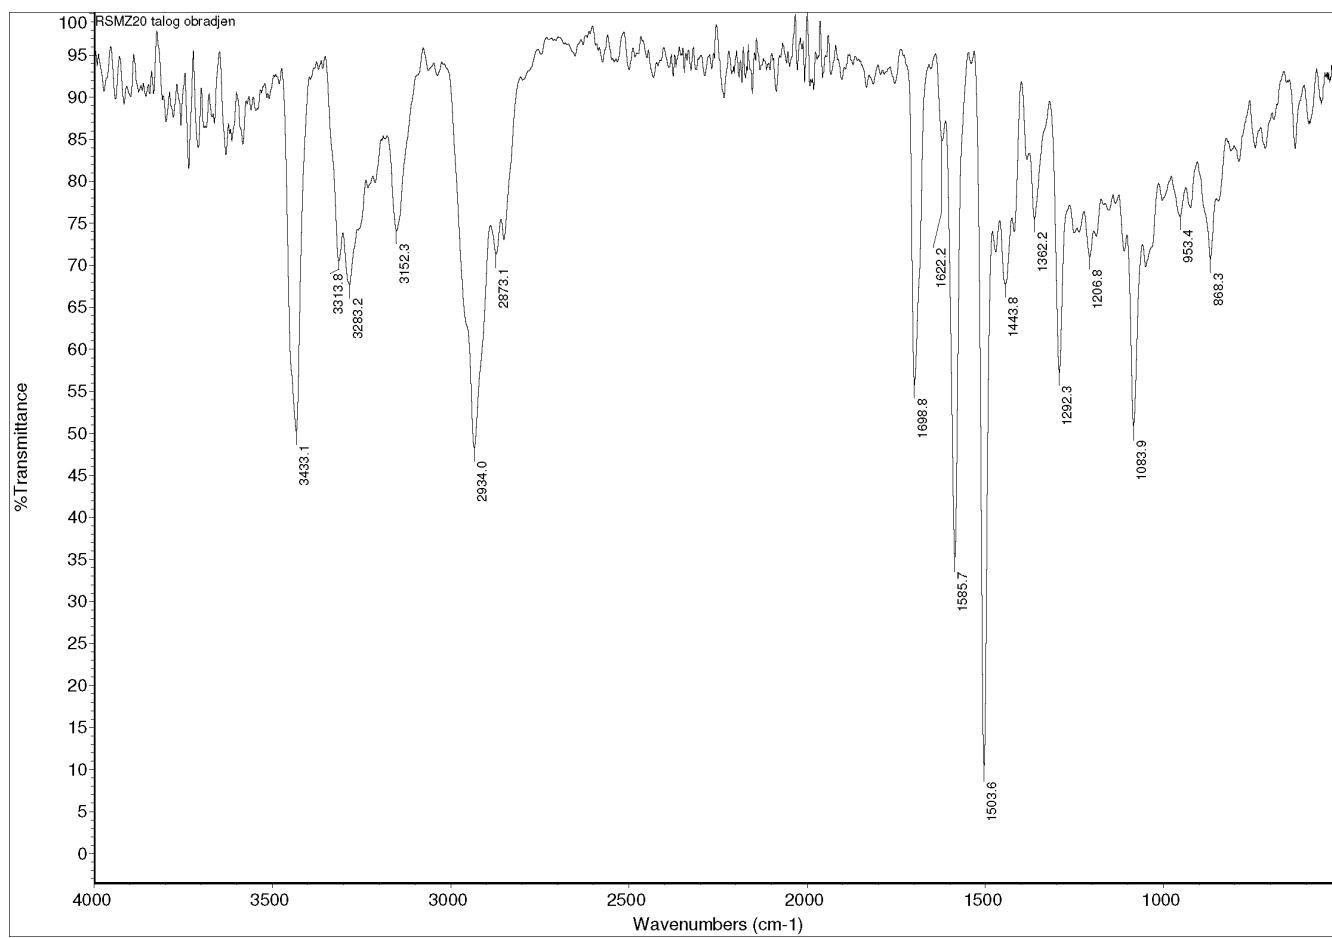

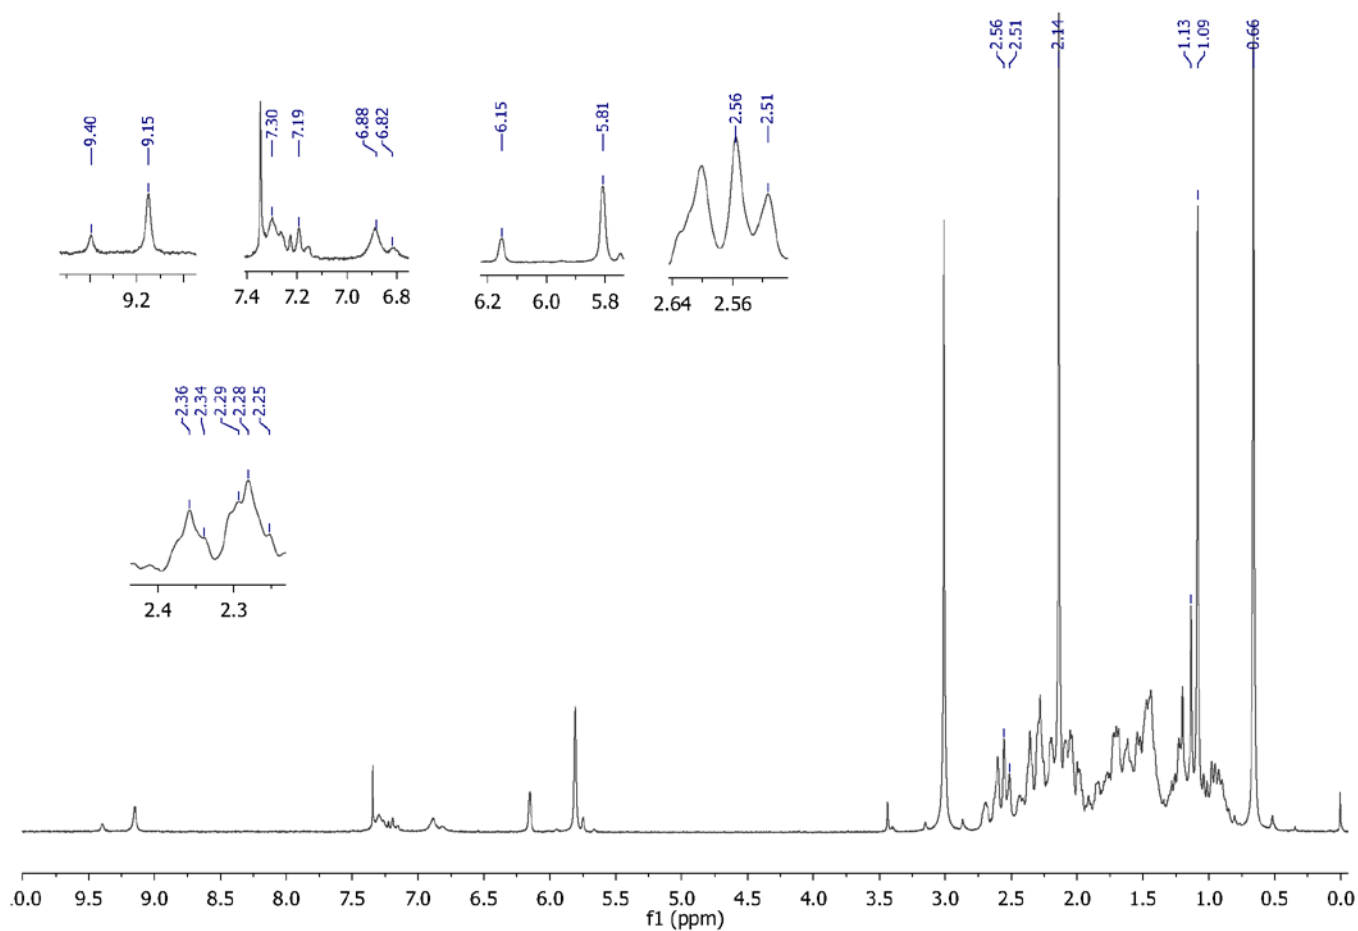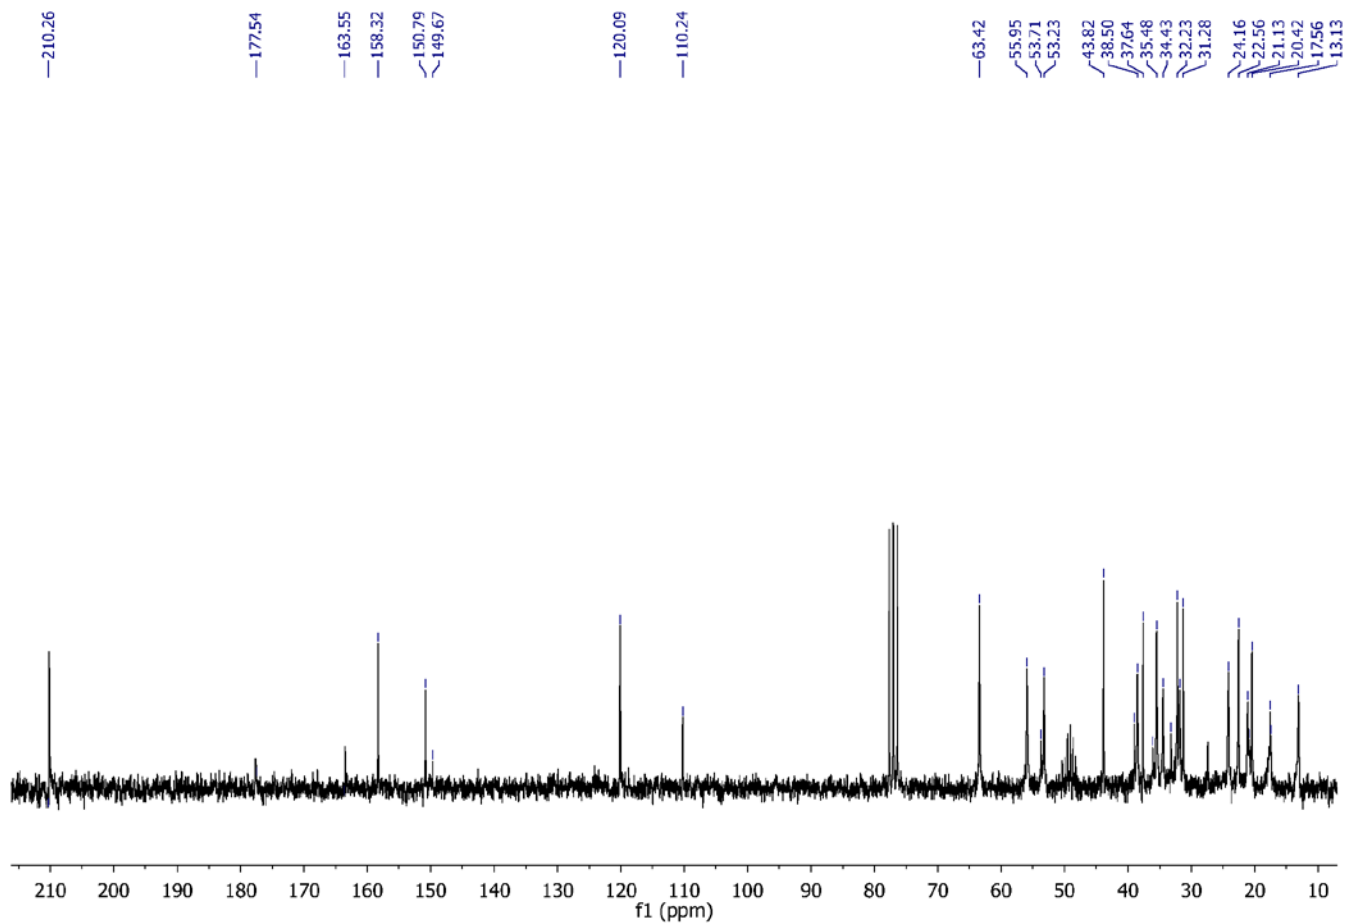

Sample Name: MZ20 Sample Location: P1-D4 Sample Id: Operator: Milka  
 Data File Name: D:\PE Sclex Data\Projects\Sladic\Data\MZ20\_AF70V\_pos1.wiff Acq Time: May 07 2015, 11:28:41 AM  
 Method: d:\TOF\_Data\damethods\Night\_Seq\_Comp\_ident1.anm\efc.xml

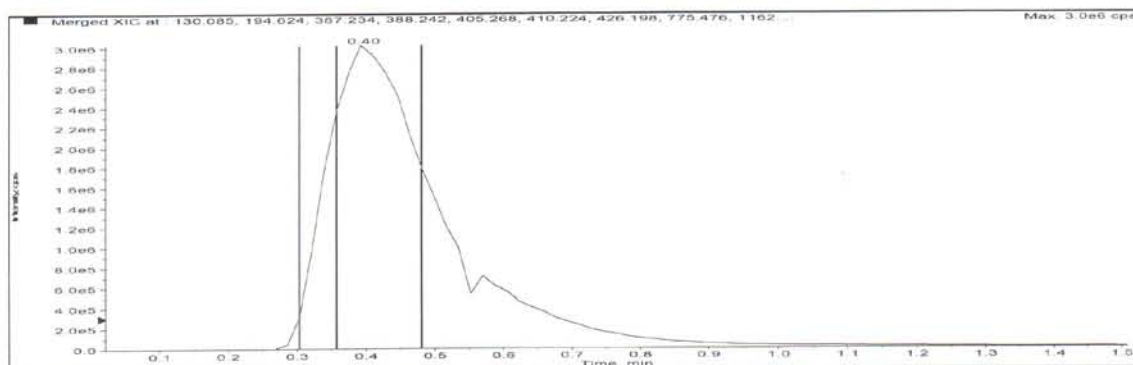

Merged XIC, Period# : 1 Experiment# : 1

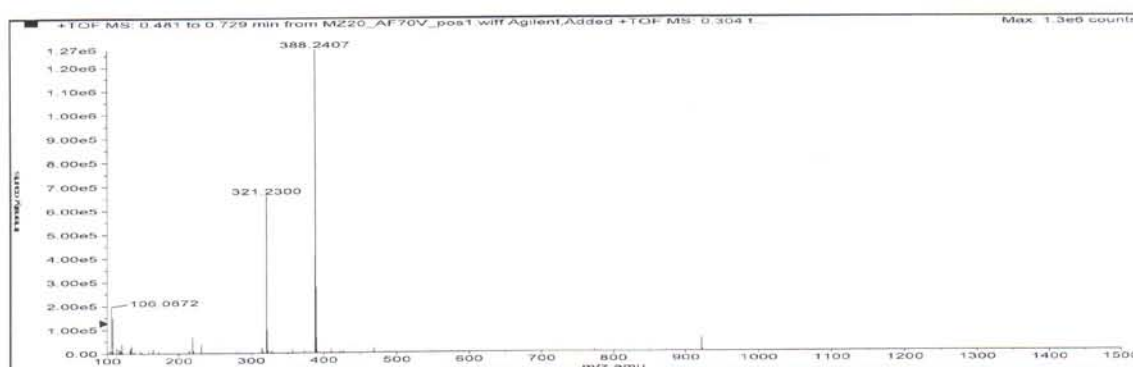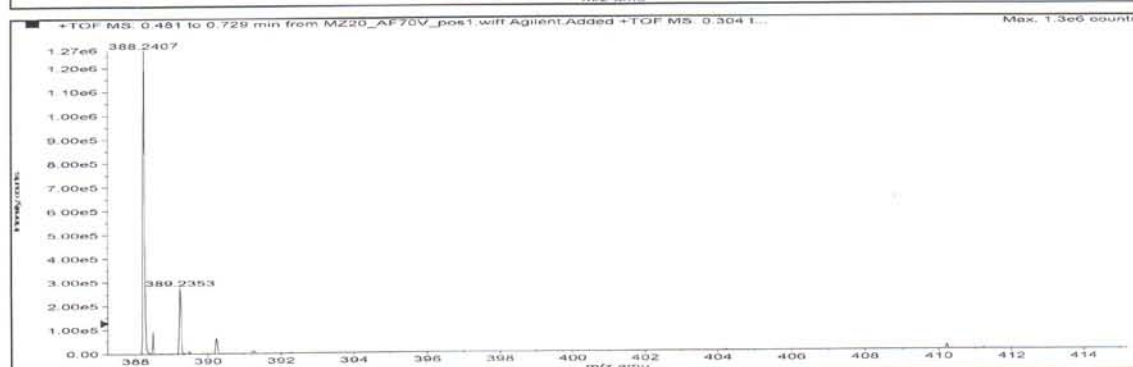

| Formula    | Compound name | Mass      | Peak RT (min) | Peak area  | Description |
|------------|---------------|-----------|---------------|------------|-------------|
| C22H33N3OS | --            | 387.23443 | 0.40          | 3.43590 E7 | --          |

| Species             | Abundance (counts) | Ion Mass  | Measured Mass | Error (mDa) | Error (ppm) | Ret. Time Error (min) |
|---------------------|--------------------|-----------|---------------|-------------|-------------|-----------------------|
| [M+H] <sup>+</sup>  | 1274663.73         | 388.24171 | 388.24102     | -0.68812    | -1.77       | --                    |
| [M+Na] <sup>+</sup> | 18648.17           | 410.22365 | 410.22379     | 0.13069     | 0.32        | --                    |

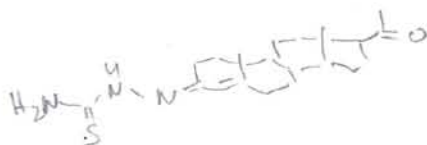

## Compound 3e

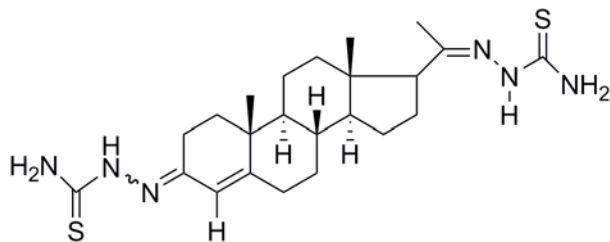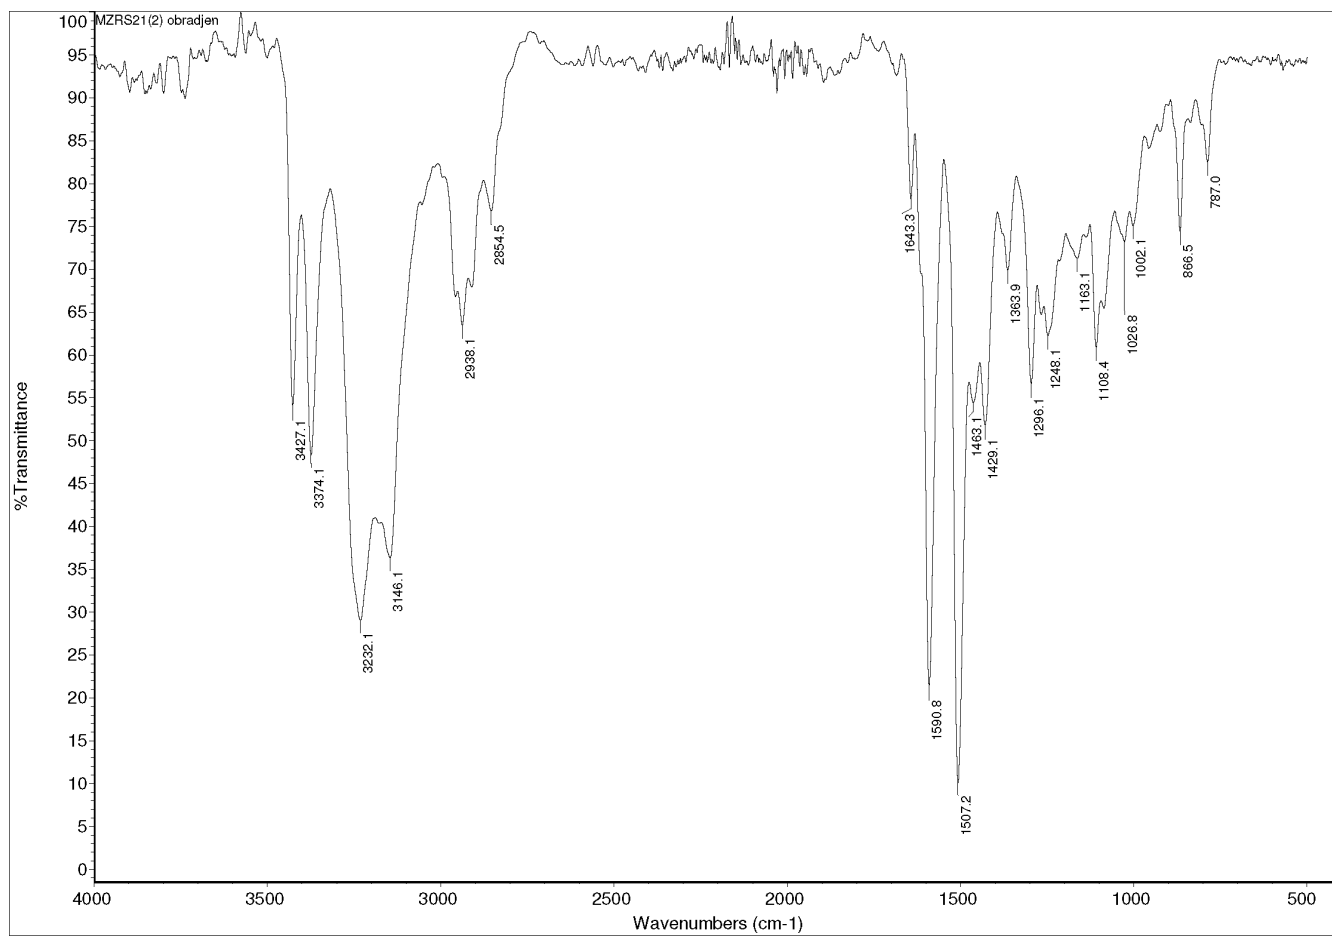

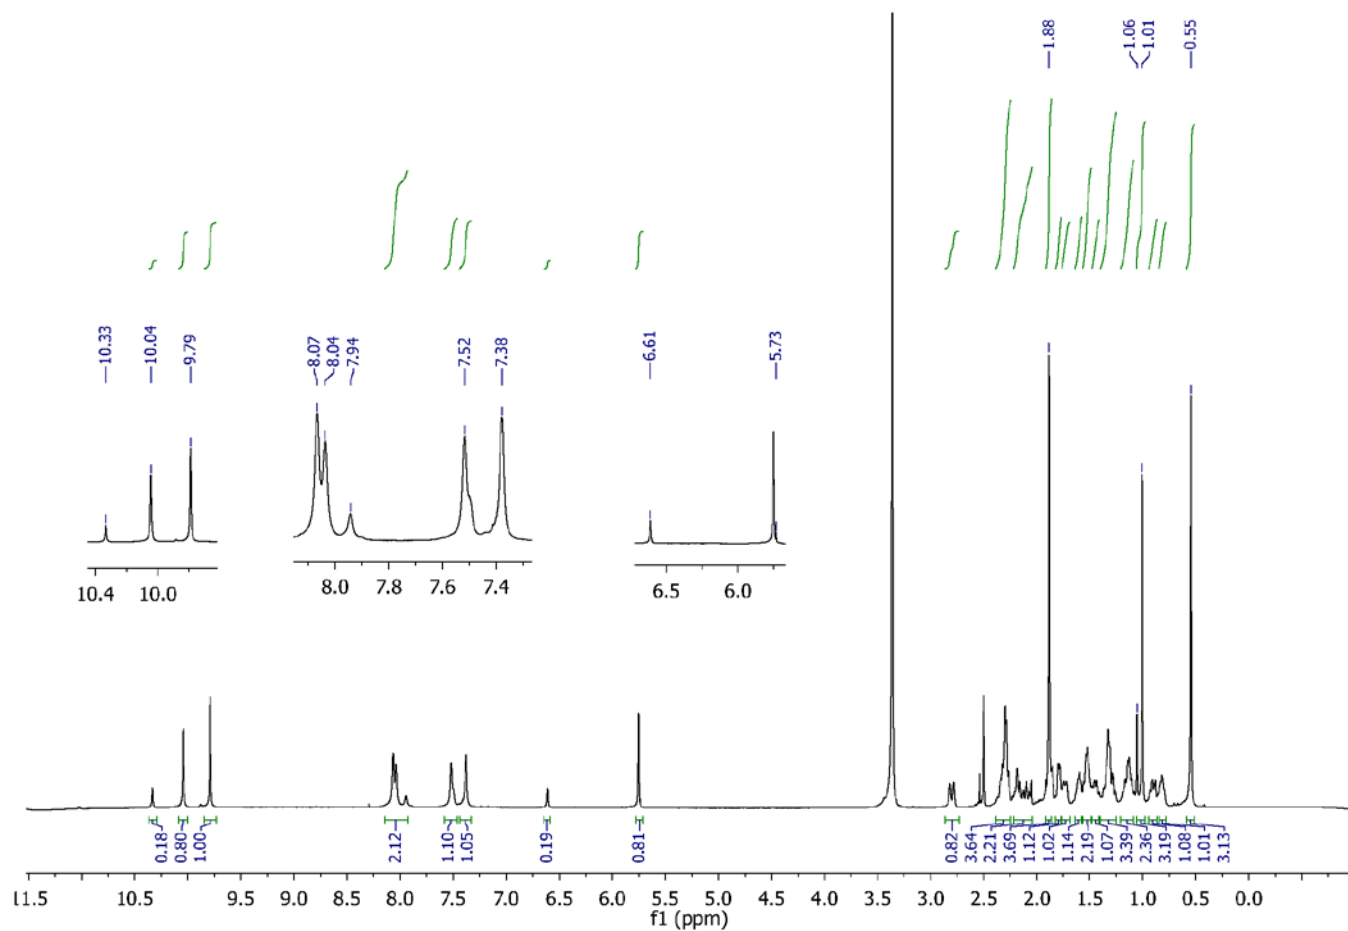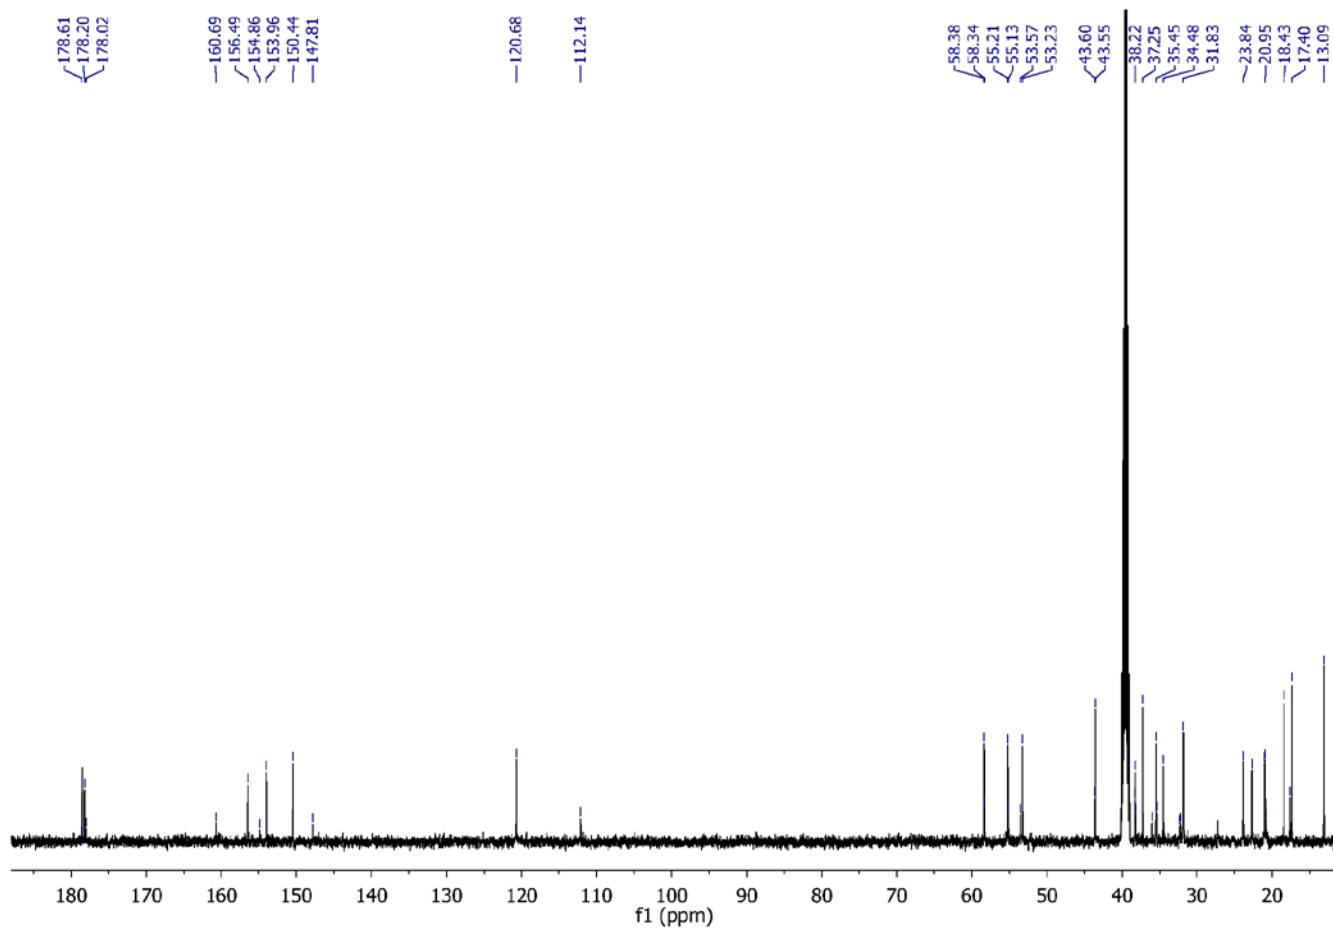

Sample Name: MZ21 Sample Location: P1-D5 Sample Id: Operator: Milka  
 Data File Name: D:\PE Sciex Data\Projects\Sladic\Data\MZ21\_AF70V\_pos1.wiff Acq Time: May 07 2015, 11:42:07 AM  
 Method: d:\TOF\_Data\damethods\Night\_Seq\_Comp\_ident1.anm\efc.xml

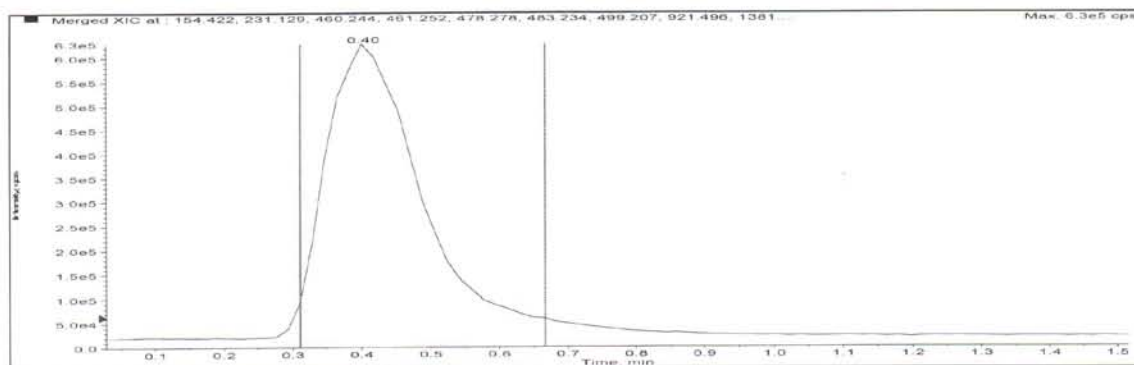

Merged XIC, Period# : 1 Experiment# : 1

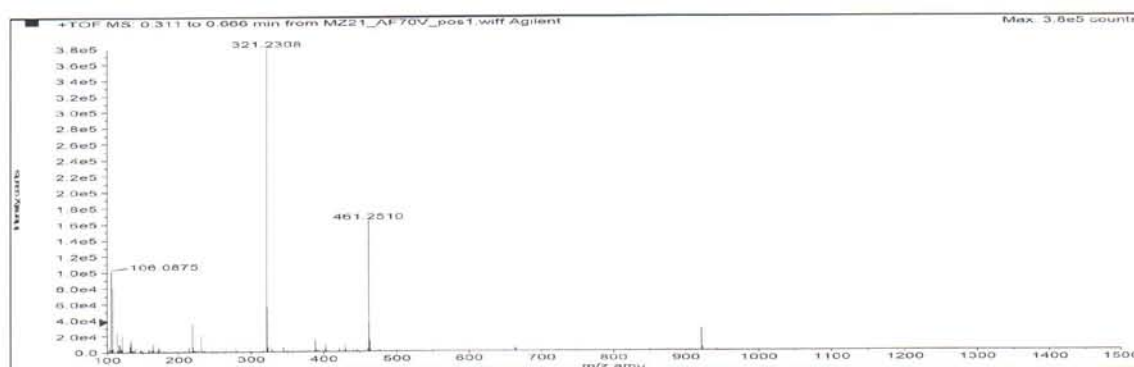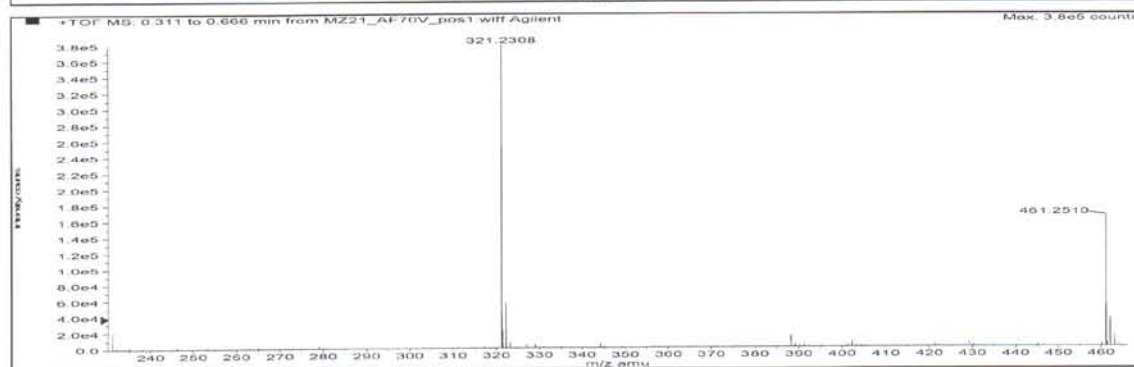

| Formula    | Compound name | Mass      | Peak RT (min) | Peak area  | Description |
|------------|---------------|-----------|---------------|------------|-------------|
| C23H36N6S2 | --            | 460.24429 | 0.40          | 6.00059 E6 | --          |

| Species              | Abundance (counts) | Ion Mass  | Measured Mass | Error (mDa) | Error (ppm) | Ret. Time Error (min) |
|----------------------|--------------------|-----------|---------------|-------------|-------------|-----------------------|
| [M+2H] <sup>2+</sup> | 21283.91           | 231.12942 | 231.11850     | -10.92236   | -47.26      | --                    |
| [M+H] <sup>+</sup>   | 163573.95          | 461.25156 | 461.25130     | -0.25807    | -0.56       | --                    |

OK! JG

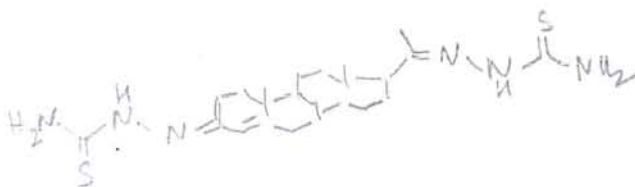

## Compound 4e

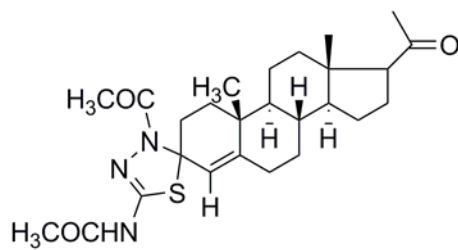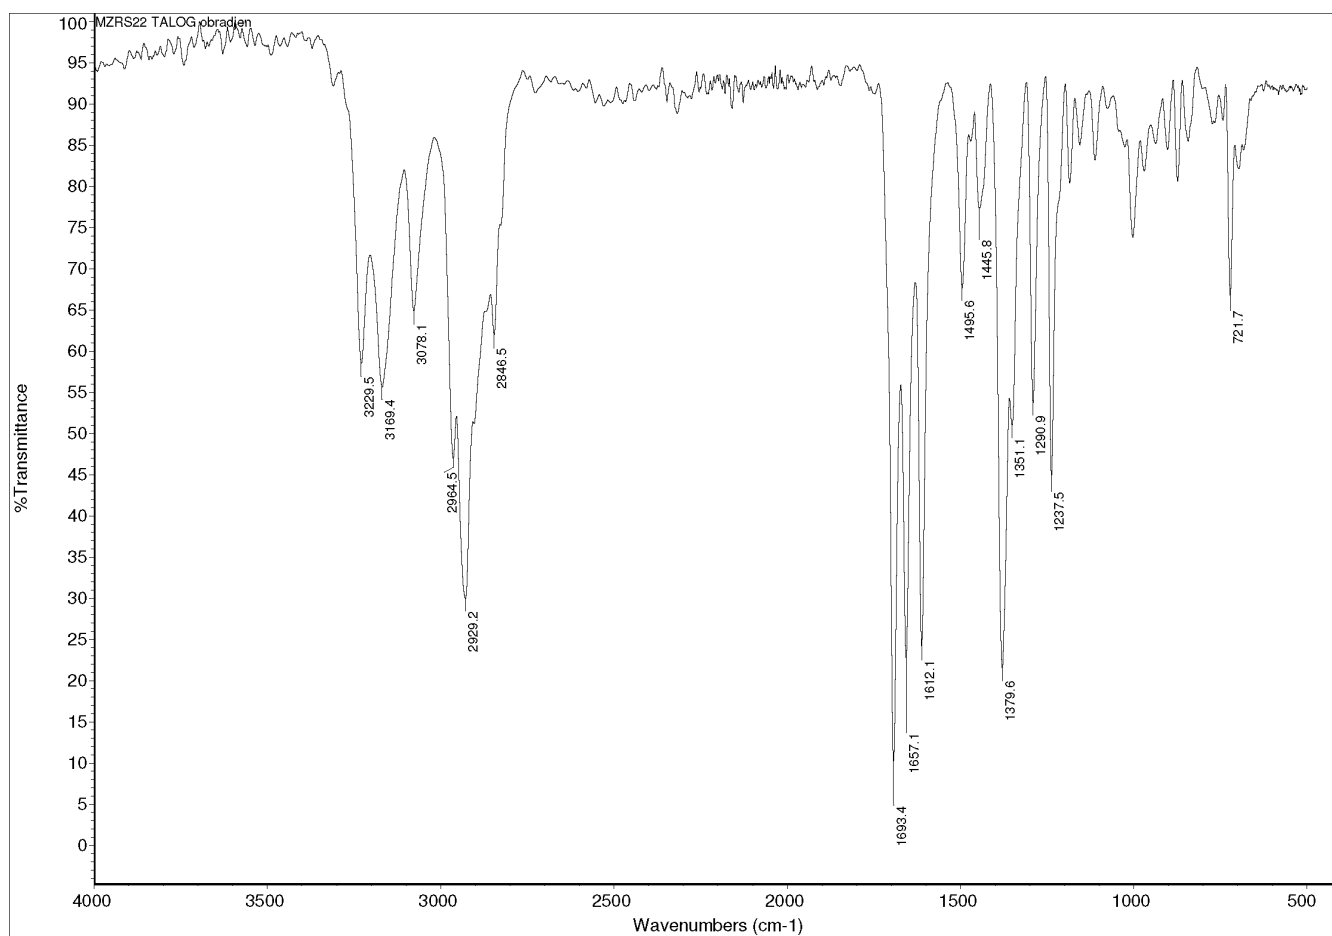

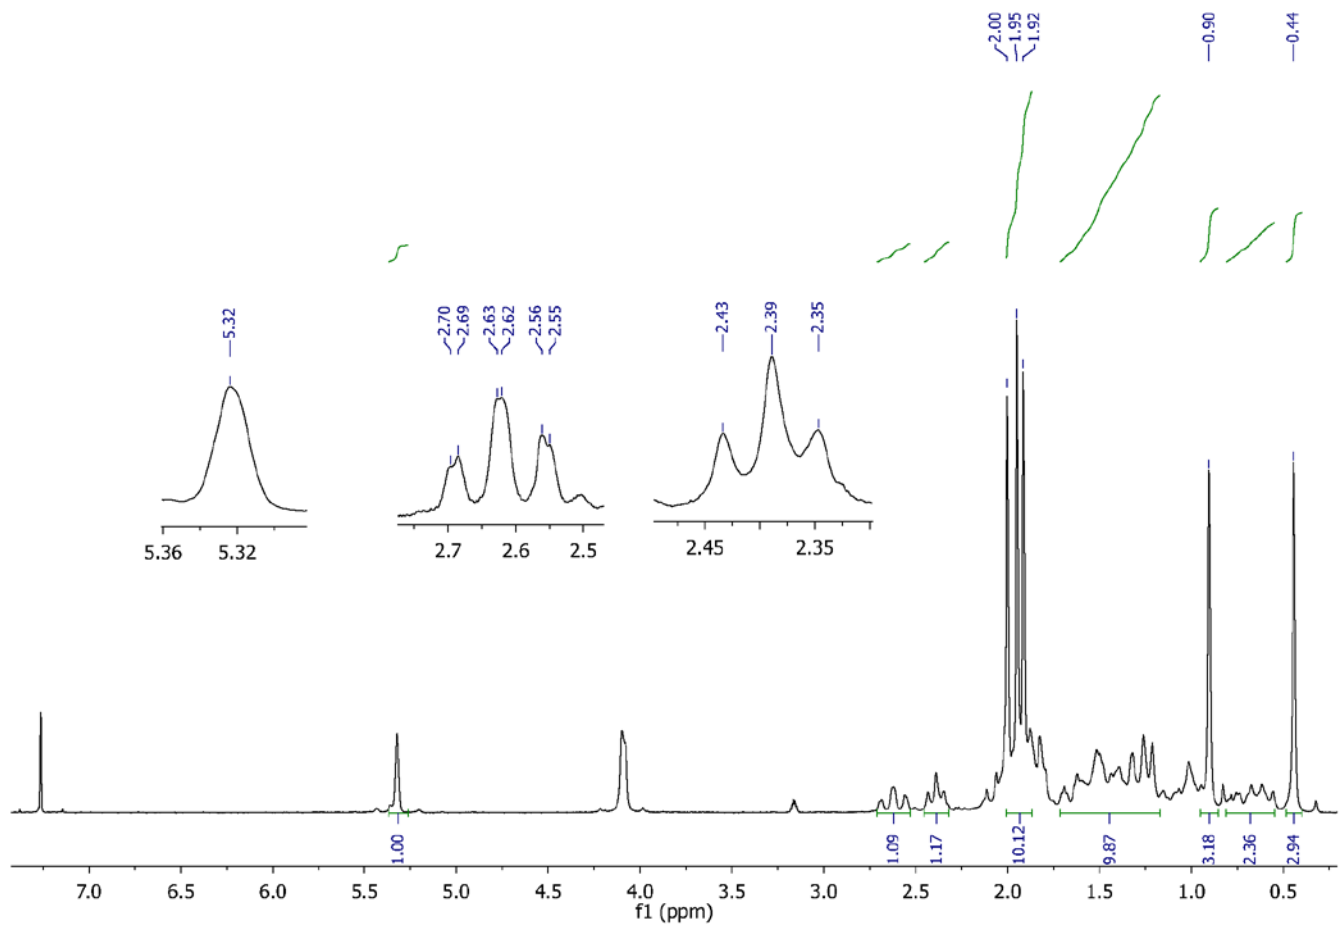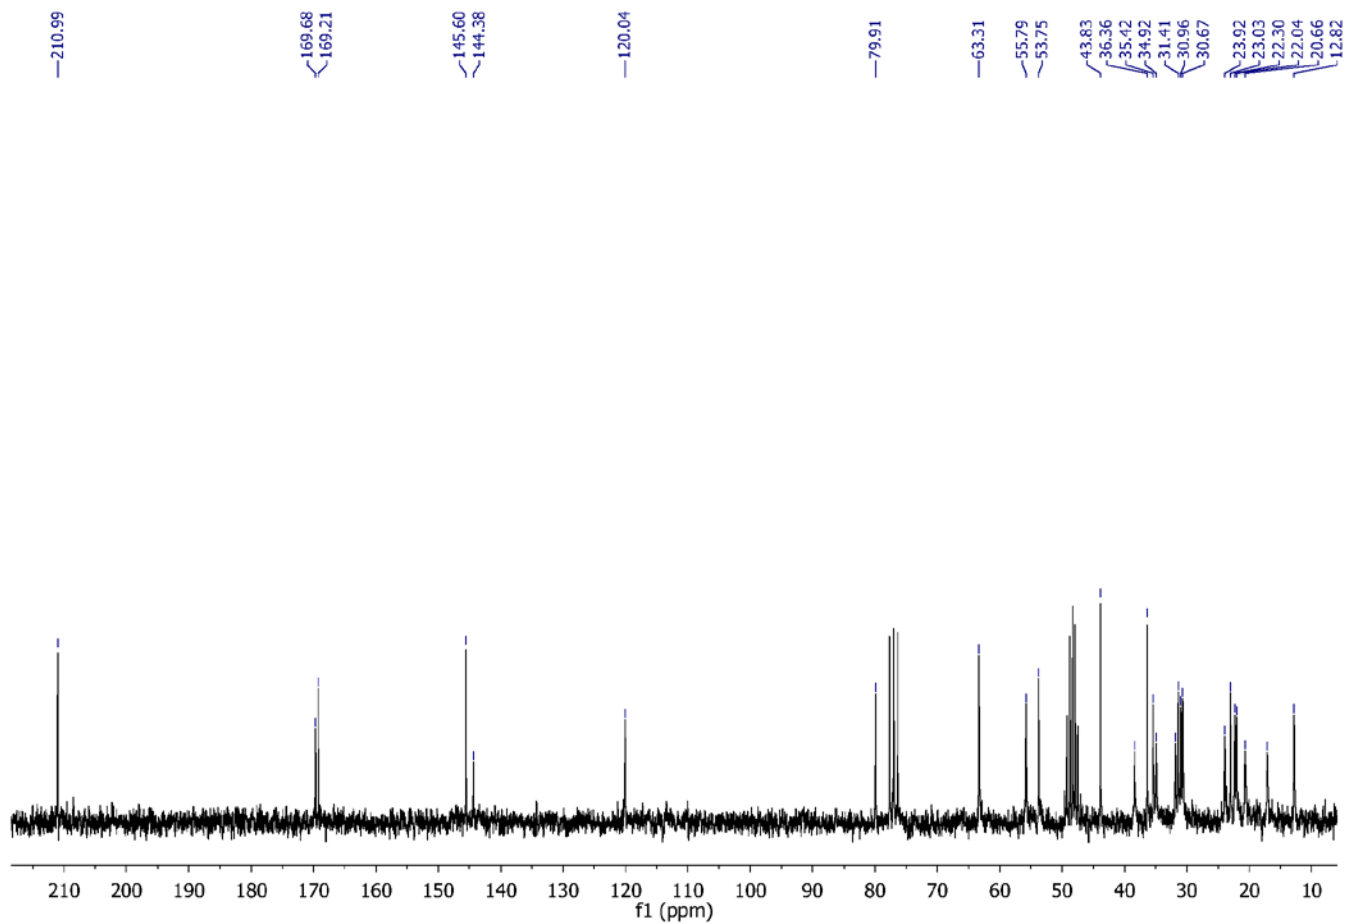

Sample Name: **MZ22** Sample Location: **P1-D6** Sample Id: Operator: **Milka**  
 Data File Name: **D:\PE Sclex Data\Projects\SladiciData\MZ22\_AF70V\_pos1.wiff** Acq Time: **May 07 2015, 11:44:39 AM**  
 Method: **d:\TOF\_Data\damethods\Night\_Seq\_Comp\_Ident1.anm\lefc.xml**

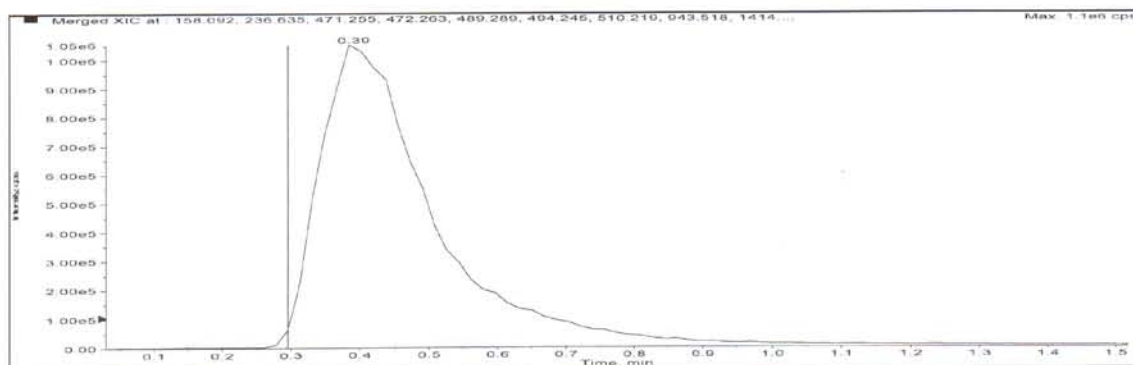

Merged XIC, Period# : 1 Experiment# : 1

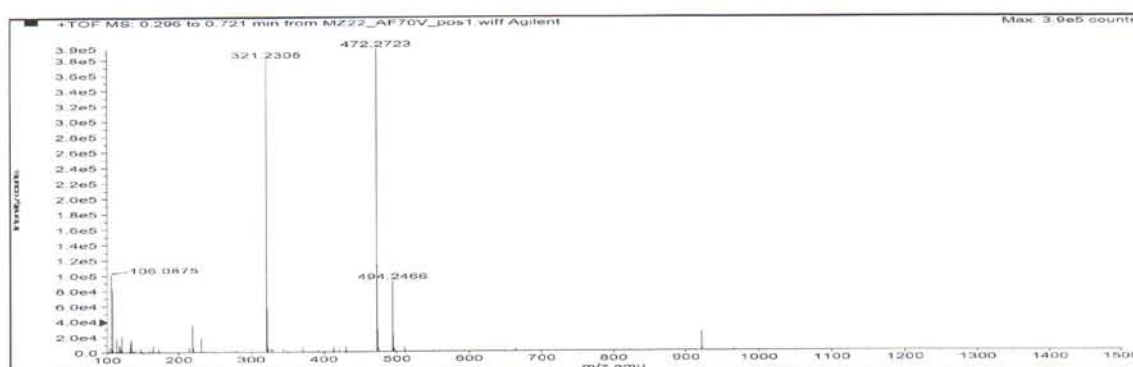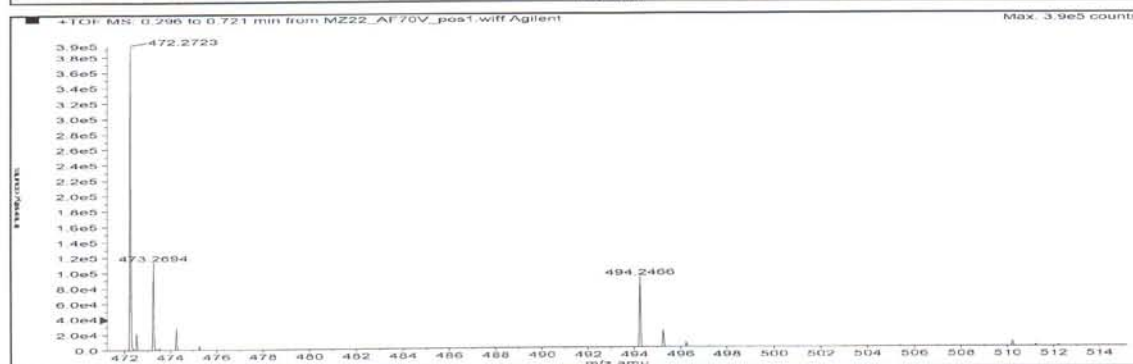

| Formula                                                         | Compound name | Mass      | Peak RT (min) | Peak area  | Description |
|-----------------------------------------------------------------|---------------|-----------|---------------|------------|-------------|
| C <sub>26</sub> H <sub>37</sub> N <sub>3</sub> O <sub>3</sub> S | --            | 471.25556 | 0.39          | 1.16231 E7 | --          |

| Species             | Abundance (counts) | Ion Mass  | Measured Mass | Error (mDa) | Error (ppm) | Ret. Time Error (min) |
|---------------------|--------------------|-----------|---------------|-------------|-------------|-----------------------|
| [M+H] <sup>+</sup>  | 417053.04          | 472.26284 | 472.26186     | -0.97699    | -2.07       | --                    |
| [M+Na] <sup>+</sup> | 92126.24           | 494.24478 | 494.24438     | -0.40077    | -0.81       | --                    |
| [M+K] <sup>+</sup>  | 6330.56            | 510.21872 | 510.21919     | 0.47390     | 0.93        | --                    |

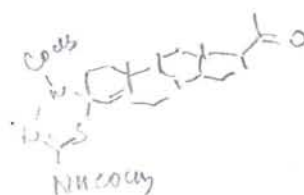

## Compound 5e

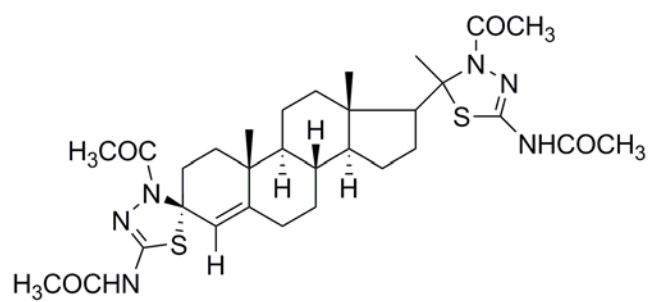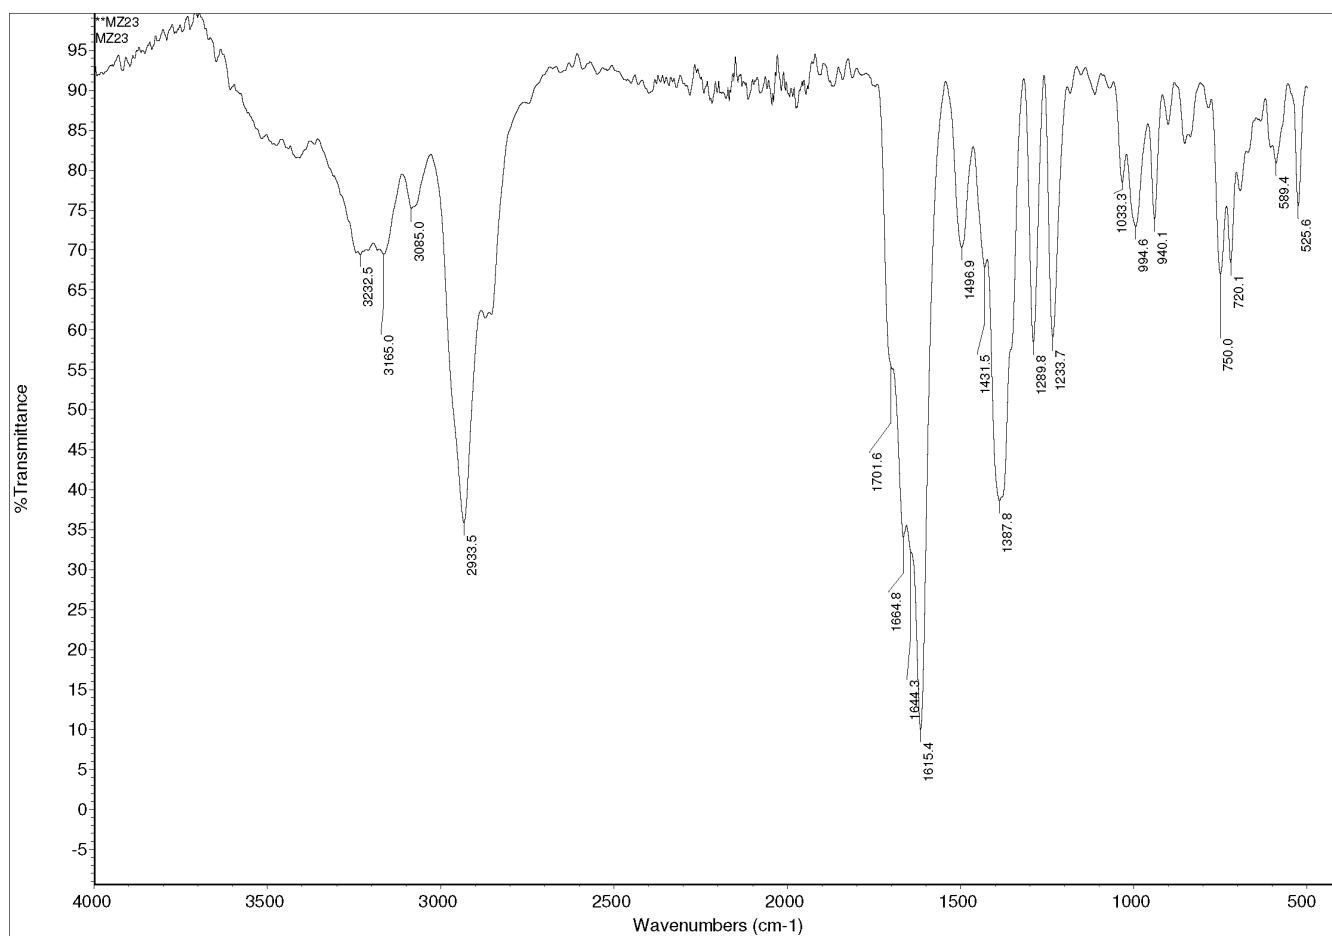

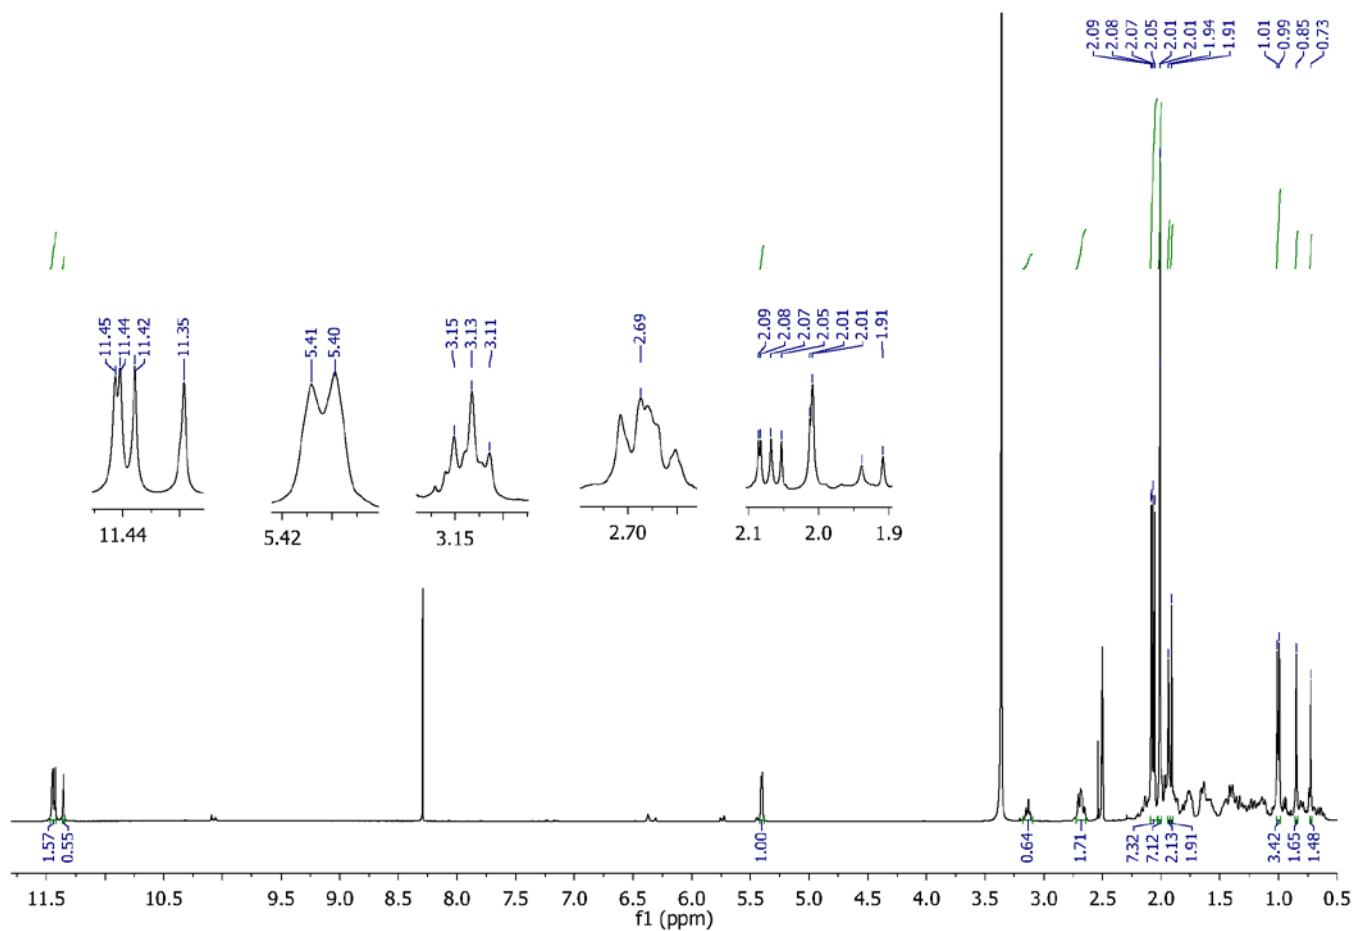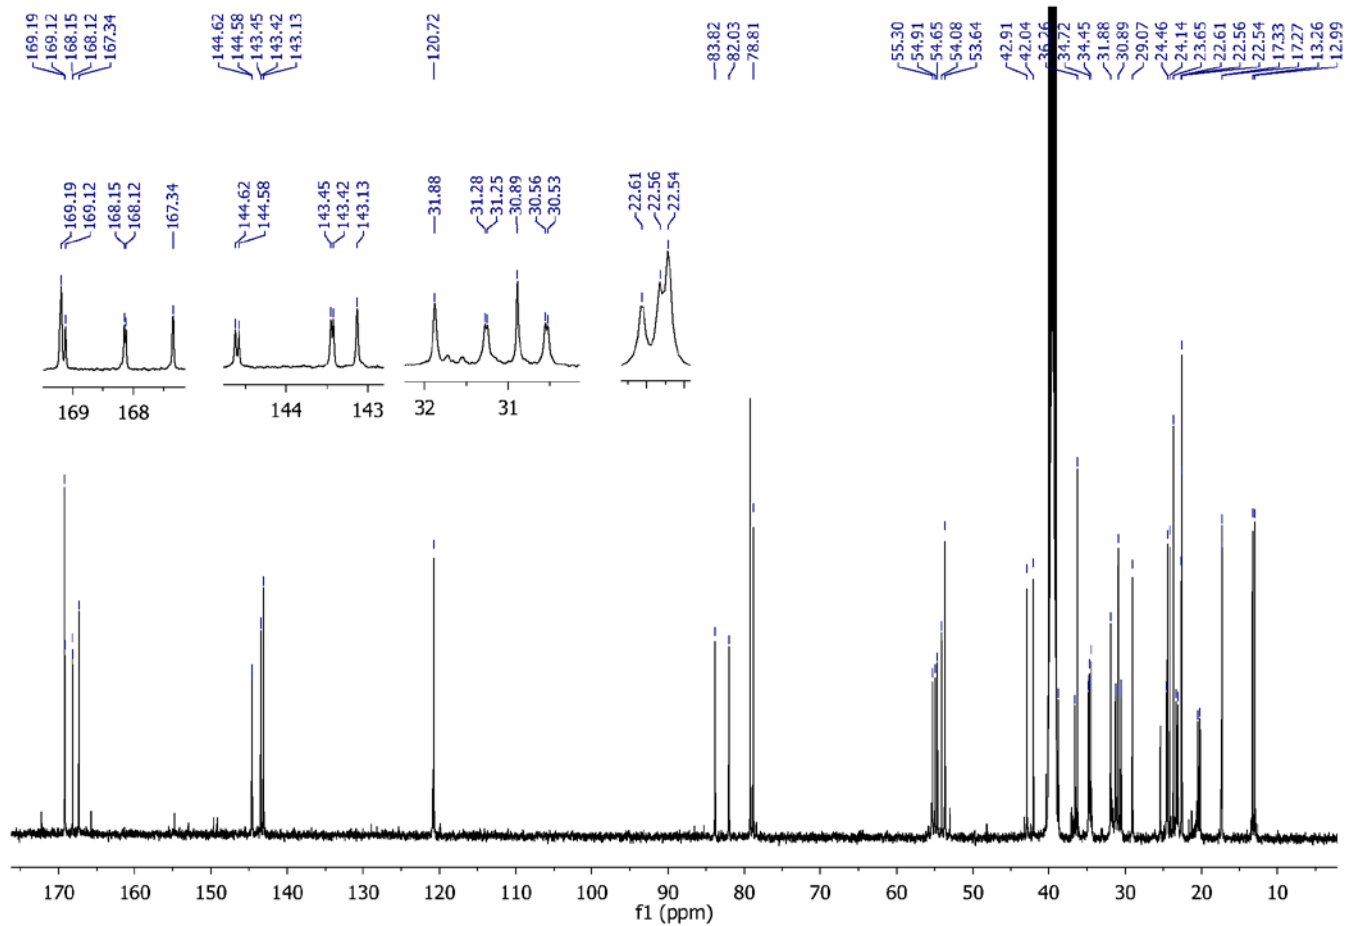

Sample Name: MZ23 Sample Location: P1-F6 Sample Id: Operator: Milka  
 Data File Name: D:\PE Sciex Data\Projects\Sladici\Data\MZ23\_AF70V\_pos1.wiff Acq Time: May 08 2015, 01:31:35 PM  
 Method: d:\TOF\_Data\damethods\Night\_Seq\_Comp\_Ident1.an\lefc.xml

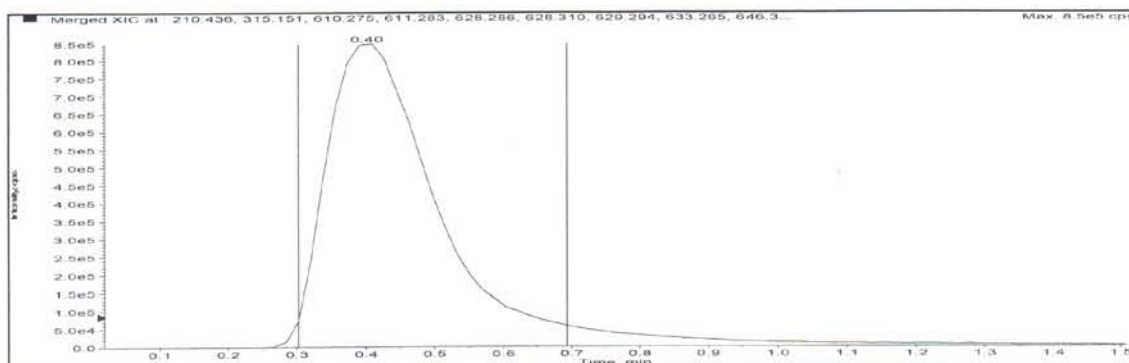

Merged XIC, Period# : 1 Experiment# : 1

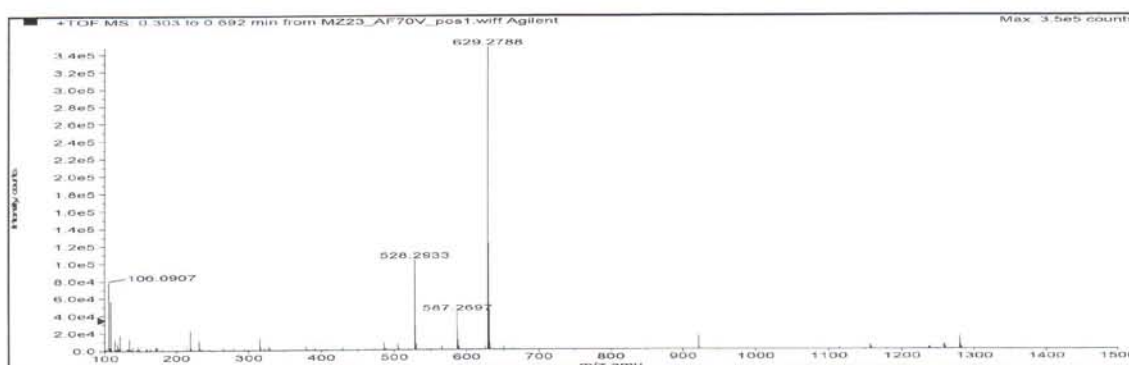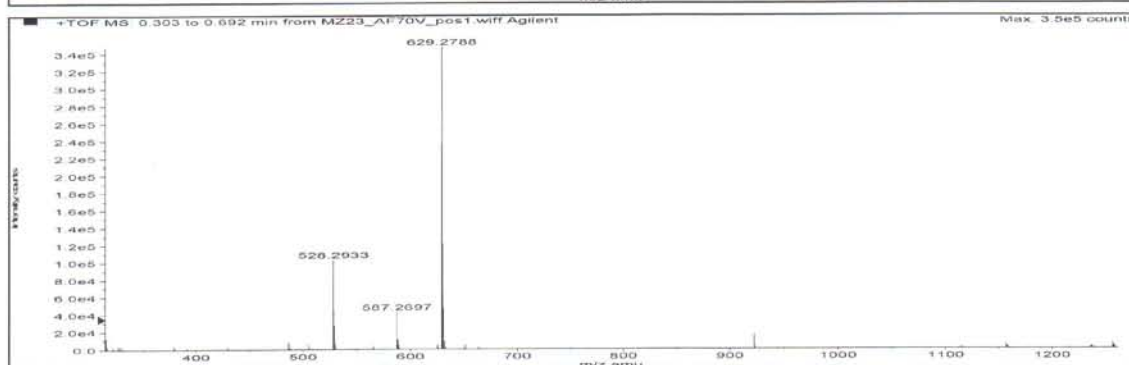

| Formula      | Compound name | Mass      | Peak RT (min) | Peak area  | Description |
|--------------|---------------|-----------|---------------|------------|-------------|
| C31H44N6O4S2 | --            | 628.28655 | 0.40          | 9.40326 E6 | --          |

| Species              | Abundance (counts) | Ion Mass   | Measured Mass | Error (mDa) | Error (ppm) | Ret. Time Error (min) |
|----------------------|--------------------|------------|---------------|-------------|-------------|-----------------------|
| [M+2H] <sup>2+</sup> | 12959.73           | 315.15055  | 315.15006     | -0.48824    | -1.55       | --                    |
| [M+H] <sup>+</sup>   | 369767.78          | 629.29382  | 629.29187     | -1.94983    | -3.10       | --                    |
| [M+Na] <sup>+</sup>  | 4818.21            | 651.27577  | 651.27484     | -0.93039    | -1.43       | --                    |
| [2M+H] <sup>+</sup>  | 6238.23            | 1257.58037 | 1257.57804    | -2.32970    | -1.85       | --                    |

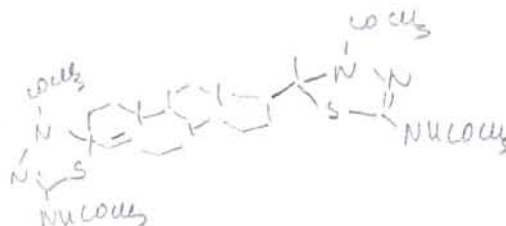

Supplement: c6ra01516f1.pdf [file c6ra01516f1.pdf]
